# Supplementary material for: Chitinase 3-like-1 contributes to acetaminophen-induced liver injury by promoting hepatic platelet recruitment
Source: eLife. 2021 Jun 10;10:e68571. doi: 10.7554/eLife.68571 (PMC8233036; doi:10.7554/eLife.68571)
Supplement: Source data 1. [file elife-68571-data1.xlsx]

## Sheet: Figure 1
Figure 1B Chi3l1 in serum(ng/ml)			Figure 1C Relative Chil1 mRNA expression fold change over PBS							Figure 1D Chi3l1 in serum (ng/ml)			Figure 1E ALT(IU/L)
Normal	Patient		PBS	APAP						PBS	APAP			Chil1-/-
37.3655	380.247		1.10272	3.84308						13.54	49.99		WT	PBS	rmChi3l1
21.3952	564.131		0.897277	3.83598						27.88	59.32		8364.5	3297.81	5626.4
33.2603	448.57		1.33194	4.04887						36	50.21		7687.5	2737.83	7125.05
22.0696	327.578		0.608713	2.37567							39.86		8221.55	3827.4	5986.65
40.0238	203.134												8713.65	1146.57	5852.7
28.5783	514.6													651.111	7364.2
	104.895													3383.71	6070.65
	235.67													642.975
	206.558													152.956
	283.777													214.808
	1114.48													232.911
	319.65
	1288.64
	168.864
	579.74
	138.31
	159.131
	139.916
	149.297
	448.268
	977.943
	617.24
	532.217
	109.74
	163.426
	295.808
	654.556
	297.121
	339.58

## Sheet: Figure 2
Figure 2A Platelets count/mm2				Figure 2B Platelet count/mm2			Figure 2 C ALT(IU/L)					Figure 2E Platelets count/mm2
Normal	Patient			PBS	APAP		Pre-		Post-				Chil1-/-
184.889	654.222			71.1111	3200		Ctrl IgG	α-CD41 Ab	Ctrl IgG	α-CD41 Ab		WT	PBS	rmChi3l1
135.111	1265.78			35.5556	3086.22		5952.8	73.88	8832.3	488		52.9624	158.887	3901.56
263.111	1422.22			149.333	3633.78		6030.02	100.72	14596	2023.4		35.3082	52.9624	794.435
220.444	995.556			42.6667	2225.78		9187.5	1719.94	13868.5	706.35		88.2706	176.541	4590.07
56.8889	1045.33				2247.11		10200.7	543.81	7083.45	3291.32				1429.98
184.889	1358.22				2695.11		6699.31	743.28		1957.53
163.556	974.222									4398.38
341.333	1024
320	832
113.778	1073.78

## Sheet: Figure 3
Figure 3B Responsive Unit							Figure 3D ALT(IU/L)
nM Radiolgiand	Specific binding						WT	Cd44-/-
0.01	0.000397	0.003189	-0.00068	0.000288				PBS	rmChi3l1
0.21	0.002998	0.003401	-0.00034	0.001318			10046.8	4589.2	5834.62
0.41	0.005928	0.003741	-0.00052	0.002304			8048.05	3911.2	1457.86
0.61	0.009192	0.004181	-0.00046	0.003474			8857.15	5234.68	2719.94
0.81	0.012718	0.00475	-9.3e-05	0.004804			9402.51	2982.97	2307.94
1.01	0.016408	0.005254	4.7e-05	0.006611			7976.1	3742.26	1650.15
1.21	0.020084	0.00566	0.000161	0.007981				3913.68	3357.78
1.41	0.023306	0.006151	0.00031	0.009102				5163.4	5412.02
1.61	0.026558	0.006948	0.000598	0.01048				4345.08
1.81	0.029289	0.006874	0.000407	0.011394				3331.23
2.01	0.031891	0.007243	0.000466	0.012396
2.21	0.03423	0.007839	0.000703	0.013405
2.41	0.03607	0.007594	0.000568	0.01386
2.61	0.038207	0.007935	0.000785	0.014773
2.81	0.040183	0.008355	0.001279	0.015713
3.01	0.041949	0.00796	0.001279	0.016187
3.21	0.04379	0.007842	0.001169	0.016673
3.41	0.045495	0.007949	0.00117	0.017376
3.61	0.047597	0.008708	0.001669	0.018176
3.81	0.048513	0.008368	0.001775	0.018564
4.01	0.050225	0.00852	0.001809	0.019425
4.21	0.051381	0.008259	0.001664	0.019672
4.41	0.053031	0.008589	0.001591	0.020087
4.61	0.054792	0.008895	0.001665	0.020795
4.81	0.056277	0.009081	0.001993	0.021613
5.01	0.057406	0.009273	0.002057	0.022469
5.21	0.058832	0.009701	0.00242	0.022878
5.41	0.059644	0.009968	0.002597	0.023486
5.61	0.06078	0.00997	0.002693	0.023806
5.81	0.061843	0.009628	0.002263	0.023856
6.01	0.063573	0.010371	0.002166	0.024425
6.21	0.064551	0.010416	0.001635	0.024603
6.41	0.065644	0.010652	0.00147	0.025087
6.61	0.066992	0.01095	0.001639	0.025207
6.81	0.068843	0.011355	0.001565	0.025851
7.01	0.069751	0.011266	0.000908	0.026207
7.21	0.070706	0.011482	0.001087	0.026698
7.41	0.071444	0.011619	0.001388	0.027246
7.61	0.0727	0.012266	0.001841	0.027894
7.81	0.07268	0.011588	0.001935	0.02806
8.01	0.072926	0.011676	0.001672	0.028905
8.21	0.074088	0.012108	0.001488	0.029203
8.41	0.075146	0.012254	0.001862	0.029961
8.61	0.076241	0.012507	0.002176	0.030876
8.81	0.077171	0.012894	0.002894	0.031578
9.01	0.07774	0.013335	0.003459	0.032112
9.21	0.079352	0.014049	0.003924	0.032764
9.41	0.080367	0.014739	0.004223	0.033415
9.61	0.081081	0.014749	0.004097	0.033522
9.81	0.082243	0.015293	0.003588	0.03382
10.01	0.083275	0.015689	0.003342	0.034302
10.21	0.083879	0.015748	0.003033	0.034374
10.41	0.085458	0.016587	0.003305	0.035152
10.61	0.086782	0.016777	0.003107	0.035706
10.81	0.087562	0.016461	0.002959	0.035881
11.01	0.088312	0.017133	0.003484	0.036836
11.21	0.089126	0.017359	0.003869	0.037144
11.41	0.089306	0.017149	0.003832	0.037182
11.61	0.090112	0.017196	0.00407	0.037455
11.81	0.090358	0.016809	0.004154	0.037691
12.01	0.090549	0.017103	0.004011	0.03766
12.21	0.091409	0.017073	0.004005	0.037033
12.41	0.091397	0.016196	0.00376	0.036962
12.61	0.092399	0.016554	0.004368	0.037221
12.81	0.092754	0.016548	0.003944	0.037001
13.01	0.092899	0.016876	0.004295	0.037163
13.21	0.094431	0.017577	0.004604	0.037771
13.41	0.095213	0.018049	0.005179	0.038794
13.61	0.095826	0.018012	0.004798	0.039254
13.81	0.096417	0.018221	0.004953	0.039667
14.01	0.09741	0.018445	0.005454	0.040697
14.21	0.09823	0.01833	0.00495	0.041291
14.41	0.099461	0.018326	0.004917	0.041701
14.61	0.100055	0.018377	0.005073	0.042879
14.81	0.100966	0.018279	0.005144	0.043106
15.01	0.102055	0.018481	0.00501	0.043883
15.21	0.102905	0.018471	0.004733	0.043735
15.41	0.103082	0.017879	0.004683	0.043961
15.61	0.104075	0.018188	0.004879	0.044226
15.81	0.10471	0.018452	0.004736	0.044278
16.01	0.10478	0.018156	0.004237	0.043626
16.21	0.105115	0.017968	0.003933	0.043299
16.41	0.105994	0.0183	0.003913	0.044122
16.61	0.10636	0.018321	0.004095	0.044277
16.81	0.106275	0.018647	0.003779	0.044061
17.01	0.106426	0.019107	0.004293	0.044285
17.21	0.106758	0.019027	0.003868	0.044271
17.41	0.106841	0.018918	0.004115	0.044516
17.61	0.106981	0.018655	0.003861	0.044288
17.81	0.106952	0.018398	0.004184	0.044265
18.01	0.107708	0.018344	0.004154	0.044283
18.21	0.10839	0.018471	0.003676	0.044628
18.41	0.108962	0.018311	0.003667	0.044419
18.61	0.109061	0.018577	0.004091	0.044906
18.81	0.110161	0.018882	0.004134	0.045016
19.01	0.110455	0.018366	0.003746	0.045074
19.21	0.110561	0.018516	0.003714	0.045071
19.41	0.110759	0.018304	0.003689	0.045238
19.61	0.111437	0.018788	0.003439	0.045178
19.81	0.112024	0.01908	0.003132	0.045462
20.01	0.11237	0.018917	0.002824	0.04574
20.21	0.112968	0.019221	0.002739	0.046402
20.41	0.113196	0.019097	0.002717	0.047208
20.61	0.113372	0.019222	0.002851	0.047502
20.81	0.114378	0.019684	0.003088	0.048242
21.01	0.114984	0.019685	0.00323	0.048827
21.21	0.1154	0.019586	0.002953	0.049148
21.41	0.116404	0.01976	0.003542	0.049652
21.61	0.117403	0.020082	0.003972	0.050085
21.81	0.118181	0.020511	0.003827	0.050524
22.01	0.11875	0.020546	0.003963	0.050755
22.21	0.119457	0.021119	0.003942	0.05142
22.41	0.119839	0.021032	0.003802	0.05099
22.61	0.120255	0.021609	0.004202	0.051399
22.81	0.120225	0.021488	0.003535	0.051518
23.01	0.119999	0.021018	0.002743	0.051201
23.21	0.119505	0.020685	0.002247	0.05038
23.41	0.119981	0.020871	0.001935	0.050643
23.61	0.120202	0.021138	0.001398	0.051168
23.81	0.12025	0.020897	0.001465	0.051325
24.01	0.120275	0.020738	0.001297	0.051444
24.21	0.12029	0.020746	0.001277	0.051577
24.41	0.120504	0.020618	0.001545	0.051724
24.61	0.121733	0.021587	0.002214	0.05243
24.81	0.123161	0.021956	0.002643	0.05304
25.01	0.123774	0.021907	0.002808	0.053651
25.21	0.12431	0.02215	0.002787	0.053837
25.41	0.125459	0.022351	0.003677	0.054189
25.61	0.126344	0.022586	0.003899	0.054549
25.81	0.12675	0.022565	0.003576	0.054618
26.01	0.127314	0.022742	0.003965	0.05488
26.21	0.127728	0.023102	0.0037	0.054865
26.41	0.128587	0.023576	0.003434	0.054957
26.61	0.128832	0.023525	0.003034	0.055211
26.81	0.128702	0.023011	0.002284	0.054991
27.01	0.129509	0.023284	0.002255	0.05533
27.21	0.129462	0.022948	0.001851	0.055254
27.41	0.130047	0.02336	0.001911	0.056048
27.61	0.130406	0.023373	0.001851	0.05604
27.81	0.130492	0.023257	0.002311	0.055652
28.01	0.130502	0.023499	0.002238	0.05569
28.21	0.130486	0.023359	0.002548	0.056056
28.41	0.130929	0.023998	0.002913	0.056661
28.61	0.131702	0.024315	0.003644	0.057356
28.81	0.132459	0.024536	0.003638	0.057811
29.01	0.132958	0.02448	0.003709	0.058734
29.21	0.133292	0.025039	0.004141	0.059142
29.41	0.134133	0.025563	0.005055	0.05993
29.61	0.134498	0.025834	0.004794	0.060279
29.81	0.134888	0.026084	0.005304	0.060688
30.01	0.135472	0.02651	0.005635	0.061337
30.21	0.135798	0.026505	0.00544	0.061419
30.41	0.136416	0.026595	0.005387	0.061581
30.61	0.136717	0.026024	0.005098	0.061473
30.81	0.136724	0.02584	0.004767	0.061435
31.01	0.136867	0.025861	0.005103	0.061397
31.21	0.13706	0.025832	0.004675	0.061196
31.41	0.137547	0.025767	0.004496	0.061014
31.61	0.137408	0.025326	0.004158	0.060704
31.81	0.137161	0.025056	0.004128	0.060458
32.01	0.13692	0.024923	0.003754	0.060297
32.21	0.136929	0.024812	0.003761	0.060439
32.41	0.137614	0.025288	0.003921	0.060601
32.61	0.138164	0.025069	0.0041	0.060726
32.81	0.13863	0.025287	0.003537	0.060728
33.01	0.139173	0.025255	0.003726	0.060979
33.21	0.139763	0.025654	0.004124	0.061537
33.41	0.140373	0.026059	0.004936	0.061674
33.61	0.140976	0.0263	0.005176	0.061982
33.81	0.141344	0.026071	0.005254	0.062396
34.01	0.141228	0.026029	0.005174	0.062586
34.21	0.141664	0.02631	0.005528	0.062988
34.41	0.141874	0.026227	0.005642	0.063032
34.61	0.142065	0.026374	0.005452	0.063375
34.81	0.142409	0.026801	0.005791	0.063898
35.01	0.14308	0.027404	0.006526	0.064741
35.21	0.143856	0.027653	0.006073	0.064581
35.41	0.143815	0.027137	0.005334	0.064406
35.61	0.143629	0.027102	0.004817	0.064521
35.81	0.143602	0.026865	0.004504	0.064134
36.01	0.143877	0.027143	0.004104	0.064157
36.21	0.144397	0.027246	0.004241	0.064349
36.41	0.145015	0.027032	0.004142	0.064288
36.61	0.145174	0.027071	0.004054	0.064681
36.81	0.145104	0.026606	0.003816	0.064429
37.01	0.145886	0.027011	0.00459	0.065106
37.21	0.146315	0.027209	0.004612	0.065714
37.41	0.146516	0.027168	0.004947	0.065931
37.61	0.146761	0.027205	0.004887	0.06635
37.81	0.146772	0.027168	0.004657	0.066394
38.01	0.147029	0.027616	0.005476	0.066735
38.21	0.147617	0.027795	0.005939	0.066902
38.41	0.147681	0.027702	0.006392	0.066905
38.61	0.148297	0.0278	0.007	0.067399
38.81	0.148872	0.028324	0.007785	0.067645
39.01	0.149227	0.028649	0.007756	0.067744
39.21	0.14919	0.028436	0.007169	0.067257
39.41	0.149188	0.028437	0.006668	0.067308
39.61	0.14923	0.028458	0.006664	0.067225
39.81	0.1494	0.028449	0.006643	0.067234
40.01	0.15006	0.028799	0.006376	0.067426
40.21	0.150562	0.028618	0.006019	0.067609
40.41	0.150898	0.02859	0.005561	0.067613
40.61	0.15101	0.028755	0.005389	0.067838
40.81	0.151681	0.028738	0.005335	0.068057
41.01	0.152423	0.02866	0.005458	0.06878
41.21	0.15314	0.028774	0.005047	0.069126
41.41	0.153472	0.028416	0.005051	0.069328
41.61	0.153826	0.028391	0.005023	0.069376
41.81	0.15439	0.028611	0.005059	0.069535
42.01	0.154805	0.028654	0.005354	0.069636
42.21	0.154831	0.028422	0.005539	0.069371
42.41	0.154708	0.028828	0.005829	0.069604
42.61	0.155192	0.028899	0.00596	0.069804
42.81	0.154715	0.029013	0.005474	0.069431
43.01	0.154188	0.029022	0.004877	0.068877
43.21	0.153881	0.029065	0.004915	0.068986
43.41	0.153913	0.029172	0.004891	0.068626
43.61	0.153693	0.029248	0.005251	0.068629
43.81	0.153558	0.02926	0.005497	0.068837
44.01	0.153779	0.029113	0.005448	0.068936
44.21	0.153849	0.028911	0.005157	0.068661
44.41	0.153781	0.028781	0.004989	0.068719
44.61	0.154154	0.028688	0.004808	0.068814
44.81	0.154669	0.028541	0.004874	0.069213
45.01	0.154944	0.028295	0.004527	0.070062
45.21	0.155726	0.028902	0.004823	0.070299
45.41	0.155861	0.028709	0.004824	0.070641
45.61	0.156441	0.029217	0.004902	0.07121
45.81	0.156951	0.029735	0.005251	0.071861
46.01	0.157011	0.029939	0.005566	0.072432
46.21	0.156914	0.030051	0.005622	0.072805
46.41	0.156767	0.03039	0.005269	0.072824
46.61	0.156921	0.03019	0.004822	0.07214
46.81	0.1566	0.029718	0.004207	0.071437
47.01	0.156547	0.029994	0.004185	0.071114
47.21	0.156856	0.030042	0.004555	0.071175
47.41	0.157209	0.03015	0.004509	0.070814
47.61	0.157167	0.030152	0.00463	0.07048
47.81	0.15769	0.030005	0.004767	0.070496
48.01	0.158216	0.029558	0.004522	0.070009
48.21	0.158424	0.029027	0.004282	0.069505
48.41	0.158758	0.028971	0.004146	0.069706
48.61	0.159799	0.029309	0.004419	0.069936
48.81	0.160112	0.029466	0.004482	0.070133
49.01	0.160526	0.029709	0.004622	0.070337
49.21	0.161432	0.030482	0.005223	0.071075
49.41	0.161725	0.030453	0.004789	0.071497
49.61	0.162145	0.030638	0.005117	0.072165
49.81	0.162236	0.030592	0.005461	0.073114
50.01	0.161873	0.030719	0.005369	0.073413
50.21	0.16177	0.030992	0.005098	0.073582
50.41	0.161971	0.03079	0.004971	0.073629
50.61	0.16201	0.030949	0.004857	0.073682
50.81	0.162111	0.030707	0.004845	0.074184
51.01	0.162202	0.030716	0.005006	0.074457
51.21	0.162351	0.030689	0.004956	0.074421
51.41	0.16286	0.03069	0.0048	0.074417
51.61	0.162951	0.030862	0.005092	0.074616
51.81	0.163227	0.030596	0.005449	0.074592
52.01	0.163225	0.030191	0.005854	0.074267
52.21	0.163303	0.030096	0.006382	0.074209
52.41	0.163553	0.030782	0.006827	0.074042
52.61	0.164305	0.031224	0.007312	0.074226
52.81	0.164028	0.031174	0.006767	0.073738
53.01	0.164424	0.031323	0.006457	0.073633
53.21	0.165378	0.032211	0.006053	0.074506
53.41	0.16509	0.031848	0.005297	0.074199
53.61	0.165624	0.032719	0.005467	0.074616
53.81	0.165501	0.033193	0.005183	0.075037
54.01	0.165282	0.03325	0.004827	0.074723
54.21	0.165521	0.03332	0.004654	0.074949
54.41	0.166023	0.033406	0.004811	0.075356
54.61	0.165592	0.033533	0.004582	0.075127
54.81	0.165635	0.033244	0.004195	0.075293
55.01	0.166081	0.033441	0.00415	0.075753
55.21	0.166553	0.033945	0.004146	0.075973
55.41	0.167045	0.034192	0.004516	0.076263
55.61	0.167151	0.03459	0.004827	0.076597
55.81	0.166936	0.034011	0.00491	0.075874
56.01	0.166866	0.033959	0.005447	0.075714
56.21	0.167225	0.03395	0.005951	0.075635
56.41	0.167226	0.033939	0.00584	0.075256
56.61	0.167658	0.033892	0.005977	0.075418
56.81	0.167809	0.033557	0.0058	0.075473
57.01	0.168591	0.033788	0.005823	0.075784
57.21	0.169024	0.0341	0.005912	0.076193
57.41	0.169111	0.033481	0.005528	0.076347
57.61	0.169484	0.033546	0.005587	0.07652
57.81	0.169547	0.033489	0.006035	0.076795
58.01	0.169652	0.03265	0.006143	0.076963
58.21	0.169598	0.032388	0.005661	0.076822
58.41	0.169485	0.031956	0.005263	0.076709
58.61	0.16954	0.031797	0.005003	0.077077
58.81	0.170093	0.031842	0.004701	0.077766
59.01	0.170456	0.032109	0.004478	0.078033
59.21	0.170366	0.031996	0.004295	0.077985
59.41	0.170107	0.031902	0.003958	0.077993
59.61	0.170186	0.031756	0.003939	0.077896
59.81	0.170241	0.031668	0.004201	0.077906
60.01	0.170009	0.03175	0.004222	0.077878
60.21	0.170483	0.032123	0.004205	0.078379
60.41	0.170643	0.032158	0.004051	0.07861
60.61	0.171394	0.032356	0.004562	0.079164
60.81	0.171681	0.032523	0.005291	0.079469
61.01	0.172324	0.032855	0.00536	0.079863
61.21	0.172635	0.032977	0.005411	0.080135
61.41	0.172967	0.032797	0.005432	0.080401
61.61	0.173384	0.033319	0.006154	0.081057
61.81	0.173624	0.033788	0.00659	0.081158
62.01	0.173578	0.033837	0.006634	0.081214
62.21	0.173617	0.033884	0.006502	0.080813
62.41	0.173883	0.033871	0.006675	0.080802
62.61	0.174356	0.03426	0.007166	0.081276
62.81	0.174479	0.034309	0.006936	0.081224
63.01	0.174451	0.034585	0.006654	0.080977
63.21	0.174139	0.034312	0.005995	0.080758
63.41	0.174155	0.034163	0.005628	0.080814
63.61	0.174517	0.034043	0.005717	0.08071
63.81	0.17456	0.034814	0.005563	0.080827
64.01	0.174376	0.034681	0.004913	0.080483
64.21	0.174338	0.034802	0.004718	0.080733
64.41	0.174654	0.034778	0.004977	0.08079
64.61	0.174794	0.034762	0.005477	0.080887
64.81	0.174445	0.034853	0.005744	0.080504
65.01	0.17489	0.034981	0.005706	0.080769
65.21	0.174804	0.034889	0.005504	0.080466
65.41	0.175192	0.03495	0.005681	0.081092
65.61	0.175465	0.03531	0.005814	0.081726
65.81	0.175294	0.035381	0.00621	0.081833
66.01	0.175236	0.035577	0.006472	0.081694
66.21	0.175379	0.034937	0.00644	0.082061
66.41	0.175732	0.035079	0.006617	0.08253
66.61	0.176054	0.035297	0.006846	0.082739
66.81	0.176322	0.035286	0.006766	0.083117
67.01	0.176682	0.035057	0.006576	0.083066
67.21	0.17667	0.034575	0.006104	0.083048
67.41	0.176654	0.034872	0.006308	0.083222
67.61	0.17728	0.035226	0.006695	0.083301
67.81	0.177603	0.035732	0.00664	0.083137
68.01	0.17751	0.035727	0.006291	0.083302
68.21	0.177495	0.035963	0.006177	0.083007
68.41	0.177801	0.036118	0.006401	0.082957
68.61	0.178231	0.03638	0.006968	0.083378
68.81	0.178582	0.036478	0.00705	0.083081
69.01	0.179288	0.036962	0.007361	0.083252
69.21	0.179434	0.036877	0.006908	0.083102
69.41	0.179778	0.036562	0.006448	0.083269
69.61	0.180144	0.036902	0.006775	0.08335
69.81	0.180254	0.037333	0.00722	0.083469
70.01	0.180483	0.037244	0.006831	0.083068
70.21	0.18102	0.03672	0.006918	0.083546
70.41	0.181428	0.036861	0.007384	0.083419
70.61	0.181298	0.036916	0.007294	0.083293
70.81	0.181276	0.036615	0.007375	0.083503
71.01	0.18152	0.036494	0.00752	0.083599
71.21	0.180781	0.035915	0.007046	0.083121
71.41	0.18058	0.035801	0.006852	0.082997
71.61	0.180577	0.035381	0.006252	0.083104
71.81	0.179971	0.034977	0.005422	0.082419
72.01	0.179643	0.035021	0.00496	0.082566
72.21	0.179553	0.034835	0.004514	0.082488
72.41	0.179412	0.034911	0.00452	0.082698
72.61	0.179441	0.034719	0.00454	0.083026
72.81	0.179441	0.034514	0.004044	0.082959
73.01	0.179368	0.034289	0.00418	0.082925
73.21	0.179806	0.034484	0.004298	0.083493
73.41	0.18002	0.034404	0.004373	0.083869
73.61	0.180592	0.035258	0.005338	0.084378
73.81	0.1812	0.035664	0.005751	0.085032
74.01	0.181545	0.035348	0.005526	0.0849
74.21	0.181725	0.035185	0.005783	0.085066
74.41	0.1818	0.035563	0.006079	0.085546
74.61	0.181936	0.035689	0.006515	0.085972
74.81	0.182012	0.03549	0.006578	0.085627
75.01	0.181946	0.035115	0.006596	0.085266
75.21	0.18224	0.034767	0.006525	0.084827
75.41	0.182117	0.034797	0.006302	0.084377
75.61	0.182294	0.034972	0.006283	0.084061
75.81	0.182653	0.035005	0.006366	0.084063
76.01	0.182778	0.034713	0.006437	0.084005
76.21	0.182906	0.034439	0.006467	0.084119
76.41	0.183317	0.034374	0.006354	0.083665
76.61	0.183363	0.033937	0.006055	0.083548
76.81	0.18364	0.033947	0.005834	0.083809
77.01	0.183741	0.033743	0.00602	0.083891
77.21	0.184337	0.034755	0.006485	0.084924
77.41	0.184715	0.035105	0.00658	0.085371
77.61	0.185105	0.03543	0.006679	0.085562
77.81	0.185475	0.035601	0.006545	0.086088
78.01	0.185249	0.035949	0.006378	0.086159
78.21	0.184822	0.035707	0.006209	0.086538
78.41	0.184608	0.036139	0.00634	0.086885
78.61	0.184756	0.036391	0.006276	0.087258
78.81	0.184255	0.036091	0.005479	0.087022
79.01	0.183931	0.036008	0.005346	0.086853
79.21	0.184227	0.036425	0.005202	0.087006
79.41	0.184006	0.036446	0.004915	0.086838
79.61	0.184394	0.035934	0.005055	0.086688
79.81	0.184949	0.035888	0.005151	0.087348
80.01	0.184769	0.034897	0.004892	0.086506
80.21	0.184787	0.034743	0.004458	0.08612
80.41	0.185279	0.034959	0.003902	0.086178
80.61	0.185349	0.034897	0.003707	0.08597
80.81	0.18543	0.035105	0.003796	0.086167
81.01	0.185699	0.035631	0.004296	0.086649
81.21	0.185942	0.035859	0.004672	0.086585
81.41	0.186514	0.035862	0.004971	0.086324
81.61	0.186399	0.035469	0.004845	0.085861
81.81	0.186386	0.035742	0.005159	0.085738
82.01	0.185887	0.035765	0.005215	0.08529
82.21	0.185854	0.035581	0.005582	0.085205
82.41	0.186112	0.0362	0.005885	0.085427
82.61	0.18607	0.035743	0.00581	0.085739
82.81	0.185523	0.035079	0.005935	0.085267
83.01	0.185379	0.035127	0.005931	0.085088
83.21	0.185349	0.03494	0.005814	0.085065
83.41	0.185538	0.034706	0.006098	0.085282
83.61	0.185747	0.034337	0.006263	0.085253
83.81	0.185814	0.034486	0.006121	0.085544
84.01	0.185222	0.0338	0.005574	0.085246
84.21	0.185466	0.034092	0.00538	0.085654
84.41	0.186212	0.034437	0.005514	0.086143
84.61	0.186539	0.034822	0.005642	0.086469
84.81	0.186692	0.035009	0.005488	0.087166
85.01	0.187177	0.034993	0.005708	0.087052
85.21	0.187842	0.034889	0.005883	0.086634
85.41	0.188636	0.035229	0.005933	0.086721
85.61	0.189411	0.036092	0.006165	0.087179
85.81	0.190127	0.036825	0.006167	0.08724
86.01	0.190591	0.036886	0.006522	0.087277
86.21	0.191466	0.037623	0.006949	0.087723
86.41	0.191696	0.037773	0.006907	0.087969
86.61	0.191115	0.037222	0.006915	0.087305
86.81	0.190861	0.037352	0.006567	0.08708
87.01	0.190182	0.037348	0.006316	0.08688
87.21	0.189901	0.037152	0.006248	0.086673
87.41	0.190349	0.037495	0.006856	0.087221
87.61	0.190396	0.037337	0.006697	0.087108
87.81	0.19016	0.036882	0.006159	0.086858
88.01	0.19012	0.03683	0.006077	0.086966
88.21	0.189984	0.037069	0.005927	0.087028
88.41	0.189539	0.03662	0.005451	0.086763
88.61	0.189297	0.036693	0.005462	0.087383
88.81	0.189102	0.036173	0.005527	0.087534
89.01	0.189525	0.035856	0.005732	0.08743
89.21	0.190095	0.036455	0.006056	0.088132
89.41	0.190396	0.036605	0.005817	0.088659
89.61	0.190803	0.036731	0.005674	0.088859
89.81	0.191025	0.03661	0.005658	0.088821
90.01	0.191272	0.036744	0.006068	0.089259
90.21	0.191297	0.036606	0.005599	0.088944
90.41	0.190704	0.036322	0.005321	0.088406
90.61	0.189733	0.035919	0.004534	0.087558
90.81	0.189646	0.035981	0.004353	0.087798
91.01	0.189189	0.035789	0.004347	0.087703
91.21	0.189896	0.035771	0.004467	0.088025
91.41	0.190279	0.036277	0.004678	0.088395
91.61	0.190625	0.03612	0.003947	0.088079
91.81	0.191147	0.036508	0.003921	0.088169
92.01	0.191103	0.037336	0.00424	0.088296
92.21	0.190884	0.03745	0.004203	0.088448
92.41	0.191137	0.037431	0.004394	0.088669
92.61	0.191251	0.037809	0.004858	0.089052
92.81	0.191574	0.037865	0.004745	0.089386
93.01	0.192152	0.038053	0.004745	0.089601
93.21	0.192566	0.03838	0.005308	0.089945
93.41	0.193021	0.038289	0.005602	0.09026
93.61	0.193028	0.03797	0.005665	0.090003
93.81	0.193417	0.038477	0.006279	0.090186
94.01	0.193808	0.038854	0.006617	0.090744
94.21	0.193643	0.038772	0.006252	0.090112
94.41	0.19329	0.038877	0.006431	0.089742
94.61	0.193212	0.038953	0.006375	0.089599
94.81	0.193724	0.038819	0.006504	0.090186
95.01	0.193303	0.038676	0.006276	0.089804
95.21	0.193607	0.03877	0.006283	0.089723
95.41	0.193549	0.038961	0.006047	0.089713
95.61	0.193759	0.038582	0.005442	0.089315
95.81	0.193963	0.038978	0.005213	0.089669
96.01	0.193985	0.039249	0.005017	0.089282
96.21	0.193908	0.038828	0.004695	0.089032
96.41	0.194284	0.038595	0.004946	0.089303
96.61	0.194195	0.038988	0.004969	0.089506
96.81	0.194407	0.038821	0.004784	0.089407
97.01	0.194777	0.038952	0.005113	0.089439
97.21	0.194865	0.038887	0.005656	0.08966
97.41	0.195177	0.038981	0.006137	0.089922
97.61	0.194664	0.038665	0.005736	0.089905
97.81	0.194679	0.038886	0.006015	0.090194
98.01	0.194648	0.038912	0.006251	0.090579
98.21	0.194933	0.039361	0.00627	0.09036
98.41	0.195282	0.039487	0.006486	0.090571
98.61	0.195154	0.039482	0.006043	0.090569
98.81	0.19529	0.039184	0.005821	0.090842
99.01	0.194715	0.039083	0.005435	0.090142
99.21	0.194659	0.039122	0.005272	0.090596
99.41	0.195118	0.038799	0.005096	0.09114
99.61	0.195074	0.038472	0.004888	0.09087
99.81	0.195423	0.038873	0.004928	0.091412
100.01	0.195347	0.038726	0.004684	0.091217
100.21	0.194834	0.038361	0.004576	0.091197
100.41	0.194725	0.038262	0.004986	0.091428
100.61	0.194285	0.038235	0.004497	0.090978
100.81	0.194147	0.037546	0.004394	0.090411
101.01	0.194242	0.03777	0.004958	0.090641
101.21	0.194178	0.03721	0.005216	0.090425
101.41	0.194234	0.036824	0.005385	0.090159
101.61	0.193854	0.036423	0.004757	0.09001
101.81	0.194069	0.036187	0.005032	0.090161
102.01	0.194529	0.036183	0.005009	0.090209
102.21	0.195338	0.036921	0.005466	0.09056
102.41	0.196017	0.036897	0.005911	0.091202
102.61	0.195445	0.036319	0.005546	0.090556
102.81	0.1959	0.03644	0.006199	0.090954
103.01	0.196145	0.036367	0.006197	0.090845
103.21	0.196504	0.036466	0.00675	0.091677
103.41	0.197106	0.036443	0.007065	0.091561
103.61	0.196994	0.036897	0.00736	0.091591
103.81	0.196947	0.036995	0.006701	0.091602
104.01	0.196762	0.037165	0.006138	0.091564
104.21	0.196664	0.037458	0.005841	0.091522
104.41	0.196785	0.037345	0.005874	0.091262
104.61	0.196923	0.037239	0.005394	0.090905
104.81	0.197166	0.037047	0.005157	0.090879
105.01	0.197553	0.037599	0.005039	0.091146
105.21	0.197925	0.038067	0.005063	0.09119
105.41	0.197827	0.038018	0.004664	0.090751
105.61	0.197411	0.037898	0.003888	0.090642
105.81	0.197656	0.038262	0.003758	0.090784
106.01	0.198018	0.038492	0.003936	0.090922
106.21	0.198408	0.039331	0.005102	0.091504
106.41	0.198635	0.039406	0.005615	0.091649
106.61	0.19811	0.039169	0.005247	0.091185
106.81	0.198473	0.039265	0.005781	0.091571
107.01	0.19858	0.039169	0.005568	0.091833
107.21	0.198446	0.038805	0.00551	0.091858
107.41	0.198266	0.038543	0.005204	0.091238
107.61	0.198286	0.038563	0.004653	0.091577
107.81	0.198574	0.038413	0.003824	0.091439
108.01	0.198871	0.038444	0.003791	0.09189
108.21	0.199528	0.039026	0.004223	0.09252
108.41	0.199637	0.038651	0.00418	0.09228
108.61	0.200013	0.038755	0.004536	0.092874
108.81	0.200374	0.038894	0.00509	0.093143
109.01	0.200667	0.039305	0.005849	0.093696
109.21	0.200656	0.039448	0.006006	0.093606
109.41	0.200851	0.038957	0.005592	0.093219
109.61	0.200993	0.038982	0.005919	0.093137
109.81	0.201521	0.039209	0.006161	0.092997
110.01	0.201811	0.039386	0.006942	0.093446
110.21	0.20198	0.039703	0.007323	0.093695
110.41	0.20226	0.039929	0.007327	0.093911
110.61	0.202347	0.040001	0.006814	0.094162
110.81	0.202393	0.039671	0.006478	0.094069
111.01	0.202091	0.039084	0.005615	0.093812
111.21	0.201667	0.038287	0.005015	0.093269
111.41	0.201615	0.038495	0.004352	0.093383
111.61	0.201708	0.038624	0.004012	0.093814
111.81	0.201366	0.038154	0.003733	0.094071
112.01	0.200659	0.037736	0.003527	0.094275
112.21	0.200208	0.037872	0.00343	0.093999
112.41	0.199616	0.037771	0.003204	0.093988
112.61	0.199597	0.037886	0.003947	0.094124
112.81	0.199009	0.037633	0.004084	0.093732
113.01	0.198931	0.037705	0.003892	0.093976
113.21	0.199137	0.037686	0.003882	0.093775
113.41	0.199124	0.037145	0.004079	0.09352
113.61	0.199097	0.037056	0.004098	0.093481
113.81	0.198878	0.036876	0.003923	0.09308
114.01	0.198916	0.036931	0.004144	0.09336
114.21	0.199184	0.037058	0.003782	0.093001
114.41	0.199619	0.037086	0.003726	0.092732
114.61	0.200288	0.037037	0.003569	0.092635
114.81	0.20056	0.037086	0.003655	0.09258
115.01	0.200604	0.037008	0.00384	0.092526
115.21	0.201022	0.03726	0.004296	0.092889
115.41	0.201505	0.038007	0.004825	0.093503
115.61	0.201085	0.037477	0.004954	0.093315
115.81	0.200923	0.036821	0.004882	0.09345
116.01	0.20112	0.037126	0.004909	0.093637
116.21	0.20129	0.03712	0.004751	0.093397
116.41	0.201618	0.0378	0.005527	0.0943
116.61	0.202255	0.038357	0.005992	0.094318
116.81	0.201714	0.038395	0.00559	0.094089
117.01	0.201816	0.03883	0.005528	0.094037
117.21	0.202096	0.038573	0.005414	0.093914
117.41	0.201757	0.038443	0.005193	0.09369
117.61	0.201742	0.038761	0.004981	0.093495
117.81	0.201476	0.038663	0.004541	0.092584
118.01	0.201395	0.038838	0.004517	0.092401
118.21	0.201465	0.039021	0.004319	0.092038
118.41	0.201881	0.039044	0.004548	0.092102
118.61	0.201937	0.038866	0.004544	0.092137
118.81	0.20183	0.039311	0.004553	0.091869
119.01	0.201789	0.03888	0.004444	0.091751
119.21	0.201447	0.038601	0.004358	0.091558
119.41	0.201577	0.038886	0.004621	0.09187
119.61	0.201098	0.038531	0.003901	0.091465
119.81	0.201419	0.038633	0.00402	0.092038
120.01	0.201839	0.039202	0.004624	0.092973
120.21	0.201832	0.039147	0.004654	0.093022
120.41	0.202035	0.03974	0.004978	0.093645
120.61	0.202439	0.039992	0.004778	0.093603
120.81	0.202324	0.039882	0.00451	0.093414
121.01	0.202939	0.040057	0.00503	0.09362
121.21	0.203981	0.040257	0.005486	0.094256
121.41	0.204593	0.040643	0.006127	0.094875
121.61	0.205046	0.040667	0.006459	0.095013
121.81	0.205781	0.040839	0.006873	0.095225
122.01	0.206232	0.040847	0.007415	0.095388
122.21	0.206473	0.0407	0.007902	0.09553
122.41	0.206535	0.04055	0.007995	0.095667
122.61	0.206723	0.039911	0.007251	0.095127
122.81	0.206846	0.040336	0.007165	0.095291
123.01	0.206589	0.039672	0.007083	0.095222
123.21	0.206045	0.039462	0.006925	0.095363
123.41	0.20575	0.039551	0.006843	0.095541
123.61	0.205463	0.039486	0.006781	0.095458
123.81	0.205427	0.039931	0.006675	0.096126
124.01	0.205116	0.039574	0.00633	0.095947
124.21	0.204752	0.039646	0.005937	0.096147
124.41	0.204832	0.039695	0.005446	0.096232
124.61	0.205323	0.039884	0.005673	0.096271
124.81	0.205691	0.040156	0.005771	0.09634
125.01	0.205523	0.039451	0.00548	0.096095
125.21	0.205918	0.040113	0.005734	0.096575
125.41	0.206405	0.040576	0.005873	0.097001
125.61	0.206353	0.040578	0.006105	0.096851
125.81	0.206926	0.041094	0.006203	0.096775
126.01	0.206632	0.040945	0.005898	0.096011
126.21	0.206096	0.040696	0.005806	0.096116
126.41	0.206056	0.040663	0.005384	0.095938
126.61	0.20642	0.041027	0.005335	0.095554
126.81	0.205765	0.040458	0.004923	0.095236
127.01	0.205572	0.03991	0.004926	0.095125
127.21	0.205533	0.040017	0.005073	0.095231
127.41	0.205828	0.04013	0.005626	0.095538
127.61	0.205703	0.040161	0.005322	0.095355
127.81	0.205467	0.040479	0.004643	0.095254
128.01	0.205051	0.039422	0.004399	0.094569
128.21	0.205233	0.039633	0.004679	0.095485
128.41	0.205484	0.039629	0.004557	0.095245
128.61	0.205785	0.039829	0.00507	0.095596
128.81	0.205895	0.039808	0.005127	0.095891
129.01	0.205819	0.039749	0.005056	0.095768
129.21	0.206074	0.040744	0.005452	0.096069
129.41	0.206482	0.040582	0.0055	0.096342
129.61	0.206615	0.040996	0.005763	0.096422
129.81	0.206454	0.0408	0.005536	0.096068
130.01	0.206152	0.040162	0.005897	0.095527
130.21	0.206298	0.040066	0.005826	0.095856
130.41	0.206178	0.039977	0.005787	0.095258
130.61	0.206216	0.039951	0.005863	0.094631
130.81	0.206074	0.039605	0.005497	0.094493
131.01	0.206376	0.039725	0.006067	0.094859
131.21	0.20687	0.039801	0.006549	0.094828
131.41	0.206775	0.039302	0.00633	0.094905
131.61	0.206275	0.038911	0.005875	0.09417
131.81	0.20658	0.039076	0.006194	0.094164
132.01	0.206529	0.038924	0.006278	0.094534
132.21	0.206529	0.03934	0.006087	0.094788
132.41	0.207146	0.039694	0.006008	0.094709
132.61	0.207702	0.040132	0.006041	0.095515
132.81	0.207878	0.040499	0.006063	0.095789
133.01	0.208185	0.040772	0.005978	0.095708
133.21	0.208468	0.041079	0.005893	0.096034
133.41	0.208633	0.041094	0.006028	0.096301
133.61	0.209044	0.041803	0.006437	0.096819
133.81	0.208504	0.041528	0.006071	0.096726
134.01	0.208593	0.041429	0.006195	0.096785
134.21	0.208196	0.041666	0.005768	0.097214
134.41	0.208042	0.041998	0.005676	0.09702
134.61	0.208465	0.042437	0.005927	0.097372
134.81	0.208843	0.042854	0.006304	0.098433
135.01	0.208909	0.042533	0.006389	0.098653
135.21	0.209107	0.042058	0.006335	0.098428
135.41	0.208874	0.041879	0.005898	0.098483
135.61	0.208751	0.041715	0.00603	0.098355
135.81	0.208979	0.04204	0.00636	0.098577
136.01	0.20871	0.041782	0.006167	0.098718
136.21	0.209023	0.041773	0.00612	0.098661
136.41	0.209413	0.041838	0.005979	0.098693
136.61	0.210004	0.042085	0.006265	0.098792
136.81	0.210064	0.042168	0.006757	0.098471
137.01	0.21048	0.042206	0.007274	0.098298
137.21	0.210809	0.042408	0.007503	0.098483
137.41	0.210738	0.042131	0.007562	0.098249
137.61	0.210674	0.042049	0.007269	0.098254
137.81	0.20942	0.041232	0.006066	0.097324
138.01	0.209509	0.041136	0.00604	0.097249
138.21	0.209197	0.04101	0.005722	0.096888
138.41	0.209572	0.041561	0.00574	0.096652
138.61	0.209728	0.041838	0.005484	0.097151
138.81	0.209324	0.041364	0.004909	0.096773
139.01	0.208848	0.041362	0.004487	0.096015
139.21	0.208792	0.040861	0.004068	0.095686
139.41	0.208405	0.040429	0.003498	0.095393
139.61	0.208022	0.039883	0.003085	0.094973
139.81	0.208039	0.039464	0.002772	0.094984
140.01	0.207608	0.039207	0.002359	0.09496
140.21	0.208107	0.039756	0.002449	0.095391
140.41	0.207661	0.039251	0.002118	0.094755
140.61	0.207981	0.039193	0.002598	0.094745
140.81	0.207947	0.039574	0.003003	0.095036
141.01	0.208135	0.039582	0.003672	0.095564
141.21	0.208288	0.039897	0.00396	0.096302
141.41	0.208272	0.040012	0.003902	0.096483
141.61	0.208222	0.040192	0.004089	0.096927
141.81	0.208499	0.040021	0.004327	0.09724
142.01	0.209285	0.040599	0.004808	0.097612
142.21	0.209335	0.040737	0.005035	0.098021
142.41	0.210178	0.041919	0.005727	0.09873
142.61	0.211188	0.042458	0.006072	0.099328
142.81	0.211101	0.042341	0.006342	0.098949
143.01	0.211487	0.042915	0.007019	0.099493
143.21	0.211778	0.042326	0.007275	0.099193
143.41	0.211882	0.042009	0.006853	0.098715
143.61	0.211616	0.041224	0.006208	0.098203
143.81	0.211597	0.040481	0.005784	0.097905
144.01	0.211239	0.040222	0.005632	0.097677
144.21	0.211432	0.040547	0.005603	0.097566
144.41	0.210992	0.040018	0.005155	0.096894
144.61	0.210358	0.04	0.004713	0.096219
144.81	0.21003	0.039996	0.004244	0.096055
145.01	0.209387	0.039904	0.004008	0.096012
145.21	0.209158	0.04015	0.003824	0.096136
145.41	0.209234	0.040366	0.004143	0.095899
145.61	0.209587	0.040121	0.004201	0.095986
145.81	0.209918	0.039799	0.004361	0.095974
146.01	0.209982	0.03998	0.004406	0.095869
146.21	0.21056	0.040271	0.004895	0.096503
146.41	0.211212	0.040784	0.005009	0.096913
146.61	0.211602	0.040508	0.005413	0.096959
146.81	0.211321	0.040513	0.005651	0.097266
147.01	0.211464	0.040311	0.005999	0.09754
147.21	0.21143	0.039999	0.006128	0.097412
147.41	0.211924	0.040087	0.00603	0.097915
147.61	0.212359	0.039651	0.00596	0.098478
147.81	0.212669	0.03977	0.006056	0.098935
148.01	0.212797	0.040149	0.006197	0.099316
148.21	0.213099	0.040791	0.006159	0.099469
148.41	0.212948	0.040627	0.00599	0.099413
148.61	0.212532	0.040607	0.005795	0.099149
148.81	0.212802	0.040878	0.005858	0.099507
149.01	0.21298	0.041278	0.006208	0.099634
149.21	0.213461	0.04153	0.006794	0.099697
149.41	0.213794	0.041875	0.007365	0.099511
149.61	0.214226	0.042018	0.00735	0.09958
149.81	0.214251	0.042254	0.007711	0.099516
150.02	0.214251	0.042254	0.007711	0.099516
150.22	0.212608	0.042055	0.007595	0.098553
150.42	0.210863	0.04212	0.007545	0.098427
150.62	0.209206	0.042191	0.007827	0.097893
150.82	0.207197	0.042439	0.007986	0.097381
151.02	0.205145	0.042884	0.008239	0.096683
151.22	0.20303	0.04306	0.008431	0.096379
151.42	0.200575	0.043232	0.008406	0.0961
151.62	0.198287	0.043385	0.008418	0.095549
151.82	0.196441	0.043719	0.008588	0.095283
152.02	0.194312	0.043849	0.008774	0.09448
152.22	0.192727	0.044007	0.009144	0.09395
152.42	0.190527	0.043688	0.009267	0.093637
152.62	0.188072	0.042885	0.008962	0.091994
152.82	0.186343	0.042703	0.009026	0.091275
153.02	0.184547	0.041863	0.008268	0.090173
153.22	0.182842	0.041286	0.00792	0.089113
153.42	0.181303	0.041319	0.008036	0.088502
153.62	0.179432	0.040989	0.008255	0.087745
153.82	0.177566	0.040466	0.007612	0.086687
154.02	0.176096	0.039781	0.00729	0.086032
154.22	0.174151	0.038734	0.006771	0.084638
154.42	0.172773	0.038128	0.006656	0.084308
154.62	0.171623	0.037524	0.006803	0.083772
154.82	0.170441	0.037428	0.006626	0.083273
155.02	0.169503	0.037095	0.006554	0.082886
155.22	0.168154	0.036551	0.006324	0.082874
155.42	0.167198	0.036309	0.006121	0.082499
155.62	0.166247	0.035967	0.006064	0.081969
155.82	0.165676	0.036103	0.006575	0.0819
156.02	0.164701	0.03594	0.006938	0.081723
156.22	0.163796	0.035871	0.007397	0.08173
156.42	0.163229	0.036063	0.007588	0.082131
156.62	0.16257	0.036137	0.007572	0.081811
156.82	0.161836	0.036424	0.007369	0.081464
157.02	0.160901	0.036483	0.007099	0.080968
157.22	0.160242	0.036984	0.007503	0.080457
157.42	0.159439	0.037117	0.007562	0.080074
157.62	0.15839	0.036957	0.007352	0.079642
157.82	0.157508	0.036932	0.006775	0.078886
158.02	0.15721	0.037228	0.006614	0.078494
158.22	0.156099	0.037072	0.005988	0.077684
158.42	0.155578	0.036767	0.005911	0.077263
158.62	0.155166	0.036868	0.006109	0.077145
158.82	0.154556	0.03687	0.005837	0.076259
159.02	0.15374	0.036395	0.005586	0.075909
159.22	0.153041	0.036372	0.005627	0.075136
159.42	0.152332	0.036031	0.005486	0.074785
159.62	0.151853	0.035964	0.005776	0.074885
159.82	0.15123	0.035812	0.005762	0.07482
160.02	0.150297	0.035694	0.005668	0.074766
160.22	0.149557	0.035599	0.005986	0.07473
160.42	0.148873	0.035464	0.006298	0.074805
160.62	0.14805	0.035248	0.006829	0.074544
160.82	0.147021	0.034935	0.006999	0.073856
161.02	0.146222	0.034799	0.006977	0.073748
161.22	0.145536	0.034663	0.007327	0.073431
161.42	0.144136	0.034132	0.006831	0.072369
161.62	0.14354	0.033947	0.006649	0.072064
161.82	0.143387	0.034194	0.006544	0.071688
162.02	0.142263	0.033908	0.006369	0.071296
162.22	0.141207	0.033785	0.006296	0.071028
162.42	0.140721	0.033612	0.006521	0.071057
162.62	0.140428	0.034135	0.00731	0.071267
162.82	0.139965	0.034077	0.007272	0.071087
163.02	0.139804	0.034193	0.007745	0.071138
163.22	0.139348	0.034424	0.007792	0.070844
163.42	0.13886	0.034541	0.007743	0.071037
163.62	0.139231	0.035	0.00794	0.071306
163.82	0.138549	0.034599	0.007476	0.070885
164.02	0.137996	0.034578	0.007608	0.070681
164.22	0.137796	0.034611	0.007867	0.071031
164.42	0.137102	0.034263	0.007846	0.071017
164.62	0.137105	0.034084	0.008077	0.070516
164.82	0.136894	0.033839	0.007571	0.070039
165.02	0.136335	0.033789	0.007212	0.069225
165.22	0.135209	0.033379	0.006696	0.068112
165.42	0.134912	0.033328	0.006047	0.067299
165.62	0.134792	0.033044	0.006026	0.067077
165.82	0.134242	0.032839	0.00585	0.066629
166.02	0.133367	0.032258	0.005946	0.066373
166.22	0.13298	0.031857	0.006092	0.065978
166.42	0.132516	0.031901	0.006333	0.065733
166.62	0.132571	0.032133	0.007187	0.065838
166.82	0.131964	0.032045	0.007306	0.065599
167.02	0.131375	0.032353	0.007563	0.065327
167.22	0.13047	0.032158	0.006748	0.065289
167.42	0.129957	0.032273	0.007346	0.06537
167.62	0.129511	0.031815	0.007221	0.065438
167.82	0.128546	0.031386	0.007106	0.065131
168.02	0.127569	0.031163	0.007032	0.06518
168.22	0.12725	0.031364	0.006832	0.0651
168.42	0.126969	0.03104	0.006556	0.064928
168.62	0.126998	0.030946	0.007006	0.064326
168.82	0.126771	0.03129	0.006844	0.064206
169.02	0.126345	0.031168	0.006607	0.063804
169.22	0.126154	0.031163	0.006508	0.063957
169.42	0.126521	0.03126	0.006988	0.063987
169.62	0.126214	0.030647	0.007253	0.063798
169.82	0.126369	0.030293	0.0076	0.06372
170.02	0.12617	0.029945	0.007623	0.063736
170.22	0.126246	0.030289	0.007768	0.063629
170.42	0.126035	0.030182	0.00761	0.063525
170.62	0.126092	0.030078	0.007716	0.063789
170.82	0.125415	0.030317	0.007469	0.063469
171.02	0.125013	0.030275	0.007465	0.063136
171.22	0.124608	0.029558	0.007203	0.063187
171.42	0.124463	0.029472	0.007943	0.063318
171.62	0.123939	0.028877	0.00724	0.062731
171.82	0.12389	0.029261	0.007609	0.062569
172.02	0.12333	0.028615	0.006966	0.062055
172.22	0.123278	0.028642	0.006868	0.061469
172.42	0.123059	0.029175	0.00717	0.061711
172.62	0.122316	0.02928	0.007527	0.061188
172.82	0.122035	0.029149	0.007393	0.060604
173.02	0.121711	0.029302	0.007534	0.060441
173.22	0.121402	0.02936	0.007909	0.060545
173.42	0.121086	0.029709	0.008174	0.060481
173.62	0.120123	0.029749	0.00781	0.060252
173.82	0.119778	0.029915	0.007762	0.060199
174.02	0.119047	0.030051	0.00749	0.060183
174.22	0.118639	0.03017	0.007499	0.059876
174.42	0.118155	0.029565	0.007325	0.059583
174.62	0.117723	0.029665	0.007643	0.059497
174.82	0.117335	0.029519	0.007889	0.059443
175.02	0.11724	0.02916	0.008355	0.059842
175.22	0.117064	0.028743	0.00808	0.059596
175.42	0.116926	0.029135	0.008186	0.059768
175.62	0.116477	0.028751	0.007774	0.059366
175.82	0.116425	0.029265	0.008062	0.05919
176.02	0.115981	0.029194	0.007394	0.058712
176.22	0.115272	0.029553	0.007254	0.058379
176.42	0.114745	0.029741	0.007589	0.058336
176.62	0.114513	0.029462	0.007573	0.05766
176.82	0.114804	0.029349	0.008317	0.057607
177.02	0.114394	0.029586	0.008528	0.057556
177.22	0.114742	0.029638	0.00862	0.057665
177.42	0.114588	0.02954	0.008547	0.057327
177.62	0.114092	0.029015	0.008213	0.056676
177.82	0.114286	0.029039	0.00841	0.056805
178.02	0.114274	0.028509	0.008775	0.056645
178.22	0.114379	0.028039	0.008435	0.056398
178.42	0.11428	0.027587	0.007995	0.056417
178.62	0.114402	0.027398	0.007767	0.056548
178.82	0.114481	0.027212	0.007592	0.056787
179.02	0.114418	0.027384	0.007248	0.05698
179.22	0.114264	0.027601	0.007227	0.056906
179.42	0.113923	0.027896	0.006868	0.056983
179.62	0.113138	0.027487	0.006219	0.056281
179.82	0.112149	0.027498	0.005841	0.056274
180.02	0.11189	0.027503	0.00532	0.056533
180.22	0.110736	0.027163	0.004865	0.056115
180.42	0.109927	0.026617	0.004989	0.055989
180.62	0.109258	0.026498	0.004397	0.055654
180.82	0.108828	0.026721	0.005195	0.055757
181.02	0.108343	0.026772	0.005176	0.055524
181.22	0.108154	0.026905	0.005446	0.055313
181.42	0.107544	0.026228	0.005766	0.055028
181.62	0.107601	0.026578	0.006351	0.054677
181.82	0.107146	0.026318	0.006094	0.054472
182.02	0.106965	0.025822	0.006152	0.054126
182.22	0.107324	0.026066	0.006233	0.054304
182.42	0.107451	0.026548	0.006312	0.054365
182.62	0.10787	0.027058	0.006602	0.054517
182.82	0.107689	0.026864	0.007028	0.054455
183.02	0.107544	0.026836	0.006794	0.054408
183.22	0.107741	0.026585	0.007268	0.054163
183.42	0.107406	0.026221	0.006879	0.053548
183.62	0.106553	0.025653	0.006671	0.053349
183.82	0.106724	0.025597	0.007083	0.053792
184.02	0.106824	0.025233	0.007046	0.053209
184.22	0.105446	0.024658	0.006348	0.052207
184.42	0.104405	0.024058	0.0059	0.051894
184.62	0.103991	0.024435	0.005903	0.051964
184.82	0.103936	0.024692	0.006763	0.05171
185.02	0.104084	0.025117	0.007002	0.051793
185.22	0.103734	0.024829	0.007138	0.051345
185.42	0.103622	0.024745	0.006977	0.050989
185.62	0.103957	0.025328	0.007113	0.051072
185.82	0.103258	0.02487	0.006404	0.050685
186.02	0.103736	0.025496	0.00755	0.051213
186.22	0.103878	0.026046	0.007865	0.051782
186.42	0.103099	0.026235	0.007713	0.05171
186.62	0.103146	0.026397	0.007789	0.051738
186.82	0.102851	0.026302	0.007698	0.051462
187.02	0.102553	0.026646	0.007403	0.051301
187.22	0.10239	0.026389	0.007641	0.051027
187.42	0.101852	0.02674	0.00738	0.051278
187.62	0.1013	0.026257	0.006933	0.051082
187.82	0.101402	0.026099	0.006993	0.051017
188.02	0.100802	0.025275	0.006493	0.050646
188.22	0.099607	0.024955	0.005707	0.050046
188.42	0.099653	0.025055	0.005878	0.049993
188.62	0.099413	0.025007	0.005891	0.049848
188.82	0.099829	0.024749	0.005938	0.049587
189.02	0.10007	0.02488	0.00559	0.049668
189.22	0.099712	0.024282	0.005079	0.049183
189.42	0.099543	0.024546	0.004994	0.049039
189.62	0.099481	0.02502	0.005273	0.049035
189.82	0.099288	0.024539	0.004909	0.048786
190.02	0.099512	0.025106	0.005604	0.049377
190.22	0.099068	0.024922	0.005481	0.049455
190.42	0.098837	0.024773	0.005436	0.049409
190.62	0.098817	0.024708	0.005504	0.049204
190.82	0.098495	0.024875	0.005714	0.049252
191.02	0.097843	0.024542	0.005494	0.049146
191.22	0.097547	0.024209	0.005505	0.048893
191.42	0.097083	0.023928	0.005121	0.049163
191.62	0.096733	0.023452	0.005198	0.048558
191.82	0.09683	0.023506	0.005844	0.048755
192.02	0.097153	0.023494	0.006243	0.048696
192.22	0.096746	0.02318	0.006213	0.048009
192.42	0.096993	0.023362	0.006249	0.047656
192.62	0.096956	0.023317	0.006055	0.047297
192.82	0.09746	0.024122	0.006373	0.047461
193.02	0.09746	0.024278	0.006353	0.047241
193.22	0.097563	0.024572	0.00605	0.047181
193.42	0.097794	0.025012	0.006724	0.047515
193.62	0.098079	0.025608	0.006532	0.047315
193.82	0.09803	0.025356	0.006327	0.047473
194.02	0.097999	0.025793	0.006691	0.047975
194.22	0.097766	0.025822	0.006861	0.048016
194.42	0.097494	0.025742	0.006739	0.04837
194.62	0.09682	0.025413	0.006698	0.048341
194.82	0.096831	0.025839	0.007082	0.048611
195.02	0.095831	0.025178	0.006404	0.048198
195.22	0.095439	0.025009	0.006911	0.048457
195.42	0.094381	0.024588	0.006909	0.048325
195.62	0.094053	0.024698	0.00756	0.048166
195.82	0.093958	0.024304	0.007934	0.048451
196.02	0.093895	0.024102	0.008072	0.048495
196.22	0.093375	0.023776	0.00767	0.048204
196.42	0.093216	0.023977	0.007651	0.047935
196.62	0.093565	0.024338	0.00786	0.047856
196.82	0.093527	0.02484	0.008346	0.04804
197.02	0.093399	0.024177	0.008287	0.04788
197.22	0.092999	0.023752	0.007825	0.047441
197.42	0.092968	0.023829	0.008429	0.047501
197.62	0.092758	0.024118	0.008183	0.047264
197.82	0.092289	0.023829	0.007869	0.047286
198.02	0.092476	0.024025	0.007629	0.047636
198.22	0.091944	0.024085	0.007545	0.047079
198.42	0.09151	0.023963	0.00719	0.046607
198.62	0.091047	0.023922	0.006909	0.046321
198.82	0.091192	0.024232	0.007128	0.04598
199.02	0.090463	0.023926	0.006866	0.045343
199.22	0.090205	0.023903	0.007363	0.045096
199.42	0.089685	0.02349	0.007529	0.044321
199.62	0.089926	0.023417	0.007607	0.044122
199.82	0.089927	0.023317	0.007368	0.043707
200.02	0.090172	0.023059	0.007308	0.043254
200.22	0.09032	0.023198	0.006931	0.04312
200.42	0.090441	0.023567	0.007054	0.043022
200.62	0.090721	0.023386	0.006703	0.042691
200.82	0.090216	0.023297	0.006809	0.042798
201.02	0.090026	0.022974	0.006359	0.042854
201.22	0.089622	0.022827	0.00626	0.042719
201.42	0.089999	0.023094	0.00639	0.04363
201.62	0.09021	0.023087	0.00608	0.043866
201.82	0.090127	0.022715	0.005675	0.044251
202.02	0.090253	0.022724	0.005699	0.044647
202.22	0.089797	0.022589	0.005988	0.044537
202.42	0.089779	0.022437	0.005534	0.044576
202.62	0.089565	0.022462	0.005617	0.044508
202.82	0.08926	0.022216	0.005732	0.044118
203.02	0.088891	0.022105	0.005815	0.043772
203.22	0.08894	0.021785	0.005838	0.043249
203.42	0.08894	0.021607	0.005976	0.042982
203.62	0.089002	0.02219	0.006002	0.042715
203.82	0.088774	0.022038	0.00607	0.042047
204.02	0.088981	0.022266	0.006475	0.041899
204.22	0.089117	0.022528	0.006444	0.042159
204.42	0.088659	0.022481	0.006355	0.041885
204.62	0.088602	0.02248	0.006755	0.042007
204.82	0.087882	0.023079	0.006909	0.042025
205.02	0.08757	0.023049	0.006799	0.041575
205.22	0.087268	0.023135	0.006892	0.041532
205.42	0.087127	0.022991	0.007096	0.041598
205.62	0.086938	0.023188	0.006936	0.041445
205.82	0.086433	0.022644	0.006806	0.041376
206.02	0.086035	0.022066	0.006591	0.041116
206.22	0.085267	0.021399	0.006123	0.041221
206.42	0.084698	0.020756	0.005704	0.040992
206.62	0.084308	0.020597	0.005954	0.04125
206.82	0.084014	0.020549	0.006155	0.041359
207.02	0.084226	0.020494	0.006336	0.041541
207.22	0.084357	0.02045	0.006456	0.041433
207.42	0.084019	0.020583	0.006711	0.04126
207.62	0.084371	0.020797	0.007029	0.041018
207.82	0.084574	0.020431	0.007238	0.041046
208.02	0.084628	0.020918	0.007415	0.041214
208.22	0.085171	0.020972	0.007608	0.041473
208.42	0.085102	0.021696	0.008004	0.041533
208.62	0.084883	0.0224	0.008255	0.041691
208.82	0.084217	0.022347	0.00763	0.04113
209.02	0.084175	0.022195	0.007517	0.040775
209.22	0.084367	0.022618	0.007592	0.041069
209.42	0.084122	0.022675	0.007676	0.041032
209.62	0.083902	0.022953	0.00726	0.041119
209.82	0.083551	0.022592	0.007057	0.041149
210.02	0.083154	0.021953	0.006959	0.041645
210.22	0.08284	0.021227	0.006976	0.041918
210.42	0.083237	0.021348	0.007215	0.042335
210.62	0.083224	0.021416	0.007272	0.042811
210.82	0.083321	0.021261	0.007848	0.042886
211.02	0.08348	0.020971	0.007703	0.042383
211.22	0.082991	0.020828	0.007571	0.04176
211.42	0.082966	0.020764	0.007476	0.041359
211.62	0.083354	0.02075	0.007757	0.041266
211.82	0.083023	0.020624	0.007683	0.040927
212.02	0.082777	0.021025	0.007615	0.040346
212.22	0.083065	0.021099	0.007442	0.040256
212.42	0.082446	0.021022	0.007074	0.039831
212.62	0.082089	0.021001	0.00664	0.039297
212.82	0.08215	0.02101	0.00698	0.039477
213.02	0.082496	0.021542	0.007436	0.039537
213.22	0.082575	0.021815	0.007525	0.039553
213.42	0.082085	0.021721	0.007753	0.039622
213.62	0.08201	0.021677	0.007914	0.039657
213.82	0.082158	0.021473	0.008017	0.039891
214.02	0.082497	0.021367	0.007928	0.040085
214.22	0.082858	0.021422	0.007673	0.040166
214.42	0.083217	0.021799	0.007615	0.040773
214.62	0.082739	0.021264	0.007382	0.040415
214.82	0.082791	0.021117	0.007419	0.040013
215.02	0.082694	0.020981	0.006612	0.039531
215.22	0.082575	0.020777	0.006506	0.039979
215.42	0.082807	0.020777	0.006204	0.040012
215.62	0.082464	0.020728	0.005924	0.039643
215.82	0.082046	0.020413	0.005502	0.03953
216.02	0.081898	0.019972	0.004925	0.039556
216.22	0.081582	0.019532	0.004445	0.039569
216.42	0.081268	0.01942	0.004399	0.039495
216.62	0.081024	0.019594	0.004528	0.039139
216.82	0.080802	0.01969	0.004675	0.039066
217.02	0.080415	0.019444	0.004481	0.038533
217.22	0.080123	0.019373	0.004656	0.038488
217.42	0.079905	0.019662	0.00501	0.038636
217.62	0.080159	0.020259	0.005041	0.038684
217.82	0.0801	0.020442	0.004931	0.038592
218.02	0.080232	0.021146	0.004998	0.03861
218.22	0.079974	0.021479	0.005373	0.038646
218.42	0.079953	0.021351	0.005934	0.038381
218.62	0.080001	0.021468	0.006	0.037813
218.82	0.080253	0.021653	0.00611	0.037874
219.02	0.080624	0.021774	0.006004	0.038117
219.22	0.080804	0.02208	0.006467	0.038302
219.42	0.080501	0.022177	0.00671	0.03817
219.62	0.080222	0.021993	0.006863	0.038134
219.82	0.080167	0.02202	0.006859	0.038446
220.02	0.080264	0.021692	0.006817	0.038446
220.22	0.079486	0.021387	0.006849	0.038148
220.42	0.079322	0.021236	0.006943	0.038197
220.62	0.079028	0.021197	0.007013	0.03836
220.82	0.078865	0.020537	0.006757	0.037858
221.02	0.078379	0.020291	0.007	0.037907
221.22	0.078124	0.020461	0.007291	0.038442
221.42	0.077978	0.020873	0.007556	0.038669
221.62	0.077893	0.021226	0.00751	0.038748
221.82	0.077932	0.021032	0.007451	0.038956
222.02	0.078083	0.021068	0.007504	0.038917
222.22	0.078039	0.021027	0.00801	0.039092
222.42	0.077982	0.020424	0.00771	0.0387
222.62	0.077908	0.020599	0.007583	0.038778
222.82	0.07786	0.020791	0.007323	0.038958
223.02	0.077589	0.020632	0.007008	0.038652
223.22	0.077444	0.020828	0.007196	0.038633
223.42	0.077022	0.020903	0.006994	0.038484
223.62	0.077056	0.020878	0.006506	0.038323
223.82	0.077058	0.021449	0.006472	0.038242
224.02	0.07684	0.021306	0.006818	0.037976
224.22	0.076361	0.021516	0.006793	0.03807
224.42	0.07652	0.021721	0.006766	0.038127
224.62	0.076627	0.021531	0.006711	0.038219
224.82	0.076181	0.020972	0.006597	0.037163
225.02	0.07601	0.021504	0.006826	0.037301
225.22	0.07622	0.021701	0.00711	0.037914
225.42	0.076897	0.021882	0.00727	0.037833
225.62	0.077023	0.021791	0.006963	0.037743
225.82	0.077461	0.021879	0.007314	0.038204
226.02	0.077016	0.021568	0.007337	0.037909
226.22	0.076614	0.021438	0.008084	0.038096
226.42	0.076047	0.021199	0.007729	0.038063
226.62	0.075639	0.021053	0.007874	0.038207
226.82	0.075199	0.0209	0.007588	0.037793
227.02	0.075305	0.0206	0.007801	0.037794
227.22	0.074957	0.020252	0.007766	0.037396
227.42	0.074392	0.019676	0.007415	0.036771
227.62	0.074293	0.019571	0.007154	0.036518
227.82	0.073589	0.019313	0.007086	0.036063
228.02	0.073736	0.01951	0.007162	0.036362
228.22	0.073599	0.019542	0.006985	0.036509
228.42	0.073689	0.019329	0.006586	0.036149
228.62	0.07379	0.019516	0.006422	0.035803
228.82	0.074599	0.020354	0.00681	0.035736
229.02	0.075618	0.02101	0.00717	0.036352
229.22	0.07584	0.021132	0.006866	0.036636
229.42	0.076296	0.021355	0.006591	0.036345
229.62	0.076491	0.021667	0.006842	0.036705
229.82	0.076279	0.021623	0.006941	0.036699
230.02	0.076	0.021492	0.007017	0.036605
230.22	0.075771	0.021454	0.007392	0.036759
230.42	0.075856	0.02155	0.007013	0.037026
230.62	0.0757	0.021072	0.006665	0.036702
230.82	0.075534	0.021009	0.006253	0.036338
231.02	0.075172	0.020835	0.006258	0.03612
231.22	0.073967	0.020162	0.00565	0.035366
231.42	0.073492	0.019584	0.005567	0.034927
231.62	0.073067	0.019577	0.00492	0.034718
231.82	0.072321	0.018944	0.004949	0.034506
232.02	0.072219	0.019171	0.005186	0.03449
232.22	0.071786	0.018677	0.005171	0.033871
232.42	0.07171	0.018964	0.005134	0.033762
232.62	0.071545	0.019158	0.005314	0.033669
232.82	0.072111	0.019622	0.005589	0.034148
233.02	0.071966	0.019385	0.005787	0.034548
233.22	0.071605	0.019056	0.0051	0.034148
233.42	0.071903	0.019047	0.005452	0.03454
233.62	0.07216	0.018822	0.006165	0.034985
233.82	0.07156	0.018466	0.006269	0.034527
234.02	0.072428	0.01898	0.00687	0.035231
234.22	0.072653	0.019302	0.007038	0.035723
234.42	0.073069	0.019532	0.007235	0.035804
234.62	0.072992	0.019552	0.007088	0.035631
234.82	0.072785	0.019451	0.006929	0.035331
235.02	0.072501	0.019272	0.007151	0.035325
235.22	0.072509	0.019284	0.007245	0.03532
235.42	0.072286	0.01884	0.007077	0.034949
235.62	0.071962	0.01905	0.006818	0.034944
235.82	0.071968	0.01876	0.007178	0.035148
236.02	0.071761	0.018972	0.007317	0.035069
236.22	0.071467	0.01923	0.007177	0.03488
236.42	0.070991	0.020072	0.007049	0.034991
236.62	0.070799	0.020128	0.006715	0.035001
236.82	0.070606	0.020428	0.006366	0.035013
237.02	0.070553	0.02097	0.00657	0.035319
237.22	0.07022	0.021235	0.005906	0.034945
237.42	0.069793	0.021259	0.006024	0.034863
237.62	0.069626	0.021662	0.006097	0.034543
237.82	0.06917	0.02169	0.006048	0.033945
238.02	0.069611	0.022056	0.006261	0.03445
238.22	0.069506	0.022367	0.006365	0.034282
238.42	0.069957	0.022203	0.006994	0.034116
238.62	0.070255	0.021771	0.007117	0.033893
238.82	0.070794	0.021375	0.007298	0.034256
239.02	0.070759	0.020712	0.007489	0.034301
239.22	0.071162	0.02047	0.007446	0.034159
239.42	0.07127	0.019947	0.007505	0.034151
239.62	0.071713	0.019725	0.008166	0.034792
239.82	0.071772	0.019266	0.008326	0.034713
240.02	0.071697	0.019684	0.008706	0.035048
240.22	0.071248	0.019561	0.008513	0.034498
240.42	0.071041	0.01932	0.008335	0.034283
240.62	0.071488	0.019382	0.008378	0.034663
240.82	0.070972	0.019329	0.00823	0.034713
241.02	0.070801	0.019511	0.008076	0.034819
241.22	0.070706	0.019216	0.007602	0.034694
241.42	0.070582	0.019127	0.007372	0.034306
241.62	0.070714	0.019657	0.007505	0.034607
241.82	0.070911	0.019922	0.00776	0.0349
242.02	0.070906	0.019959	0.007535	0.035079
242.22	0.07101	0.019939	0.007403	0.034726
242.42	0.071253	0.019625	0.007425	0.034926
242.62	0.071189	0.019374	0.007023	0.03478
242.82	0.071162	0.019045	0.006397	0.034799
243.02	0.070601	0.018631	0.005767	0.033937
243.22	0.070533	0.018261	0.005625	0.033504
243.42	0.070432	0.018382	0.005723	0.033539
243.62	0.070288	0.01813	0.005885	0.033885
243.82	0.069531	0.01776	0.005331	0.033398
244.02	0.06938	0.017517	0.005111	0.03314
244.22	0.068956	0.017346	0.005196	0.032263
244.42	0.068967	0.017332	0.005356	0.032274
244.62	0.069272	0.01815	0.005849	0.032829
244.82	0.069021	0.017955	0.005871	0.033058
245.02	0.069038	0.01799	0.006209	0.032931
245.22	0.069561	0.018431	0.00652	0.033485
245.42	0.069261	0.018753	0.006706	0.03336
245.62	0.069319	0.018913	0.007169	0.033466
245.82	0.06946	0.019324	0.007395	0.033755
246.02	0.069105	0.018974	0.007482	0.033578
246.22	0.068919	0.018719	0.007515	0.033662
246.42	0.068795	0.018669	0.007301	0.033991
246.62	0.068997	0.018772	0.007133	0.034083
246.82	0.069008	0.01858	0.006993	0.033649
247.02	0.068982	0.018741	0.007087	0.033697
247.22	0.068812	0.018639	0.007289	0.033845
247.42	0.06929	0.019261	0.007791	0.034633
247.62	0.069017	0.019307	0.007742	0.034771
247.82	0.068644	0.019102	0.007286	0.034182
248.02	0.068228	0.018754	0.007239	0.033576
248.22	0.068091	0.019227	0.007447	0.033353
248.42	0.068257	0.019608	0.007654	0.033455
248.62	0.068073	0.019447	0.007441	0.033438
248.82	0.067785	0.018996	0.006909	0.033081
249.02	0.067428	0.018711	0.006658	0.032699
249.22	0.067057	0.018687	0.005929	0.032566
249.42	0.066679	0.018419	0.005551	0.032134
249.62	0.067037	0.018565	0.005645	0.032059
249.82	0.066674	0.018246	0.005226	0.032066
250.02	0.066865	0.018222	0.005205	0.032558
250.22	0.067001	0.018035	0.004594	0.032659
250.42	0.067146	0.018101	0.004763	0.032491
250.62	0.067655	0.018316	0.005051	0.032851
250.82	0.067461	0.018299	0.005228	0.032501
251.02	0.067028	0.018156	0.005438	0.032792
251.22	0.067166	0.018624	0.005975	0.032972
251.42	0.067584	0.019059	0.006753	0.03328
251.62	0.067277	0.019294	0.006705	0.03317
251.82	0.067587	0.019225	0.007091	0.032905
252.02	0.067381	0.019276	0.007551	0.032663
252.22	0.067658	0.019131	0.007844	0.032606
252.42	0.067965	0.019451	0.008117	0.032644
252.62	0.067452	0.01867	0.007757	0.032336
252.82	0.06706	0.018445	0.007165	0.031622
253.02	0.067105	0.018315	0.007083	0.031859
253.22	0.066941	0.018158	0.006712	0.031587
253.42	0.067159	0.018388	0.006953	0.031557
253.62	0.067459	0.019105	0.007081	0.031744
253.82	0.067253	0.019386	0.006619	0.031596
254.02	0.067536	0.019739	0.00689	0.032121
254.22	0.067617	0.020077	0.007218	0.032174
254.42	0.067827	0.020427	0.007838	0.032385
254.62	0.06776	0.02034	0.007519	0.032819
254.82	0.067532	0.020505	0.00746	0.033028
255.02	0.067371	0.020295	0.007662	0.033426
255.22	0.067532	0.020545	0.007674	0.033841
255.42	0.06723	0.020581	0.007537	0.033908
255.62	0.066919	0.020371	0.0074	0.033942
255.82	0.067064	0.020645	0.007507	0.03422
256.02	0.066711	0.020533	0.007178	0.034748
256.22	0.066969	0.020379	0.007024	0.034779
256.42	0.066744	0.020406	0.006679	0.034635
256.62	0.06641	0.019922	0.006313	0.034385
256.82	0.06632	0.019345	0.005889	0.033515
257.02	0.066591	0.01892	0.005887	0.033544
257.22	0.066498	0.018888	0.006079	0.033126
257.42	0.066185	0.019001	0.006161	0.032804
257.62	0.066051	0.019011	0.006228	0.032411
257.82	0.066026	0.01889	0.006306	0.032311
258.02	0.065739	0.018291	0.006375	0.031986
258.22	0.065783	0.01898	0.00701	0.031897
258.42	0.066011	0.019209	0.007207	0.032003
258.62	0.066019	0.019031	0.007253	0.032162
258.82	0.066231	0.019222	0.007579	0.03251
259.02	0.066161	0.019022	0.007999	0.032956
259.22	0.065876	0.018693	0.007786	0.033012
259.42	0.065892	0.018785	0.008013	0.033349
259.62	0.065917	0.018383	0.007793	0.033605
259.82	0.066071	0.018255	0.007594	0.03421
260.02	0.066022	0.018308	0.007631	0.034395
260.22	0.066479	0.018444	0.007748	0.034144
260.42	0.065883	0.017768	0.007208	0.033519
260.62	0.066013	0.017626	0.007019	0.033162
260.82	0.065723	0.017069	0.006898	0.032846
261.02	0.065363	0.016927	0.00637	0.032779
261.22	0.064207	0.016369	0.005688	0.031961
261.42	0.06338	0.015849	0.005141	0.031067
261.62	0.062666	0.015677	0.005079	0.030489
261.82	0.062157	0.015753	0.004717	0.030159
262.02	0.0617	0.016031	0.004517	0.029082
262.22	0.061867	0.016683	0.00495	0.028838
262.42	0.062483	0.017071	0.005183	0.029161
262.62	0.062562	0.017084	0.00534	0.029056
262.82	0.062816	0.017459	0.005537	0.029176
263.02	0.062849	0.017438	0.005747	0.029122
263.22	0.062909	0.017447	0.00573	0.029071
263.42	0.063052	0.017584	0.005682	0.029663
263.62	0.063417	0.017609	0.005808	0.029884
263.82	0.063765	0.01846	0.006784	0.030728
264.02	0.063458	0.018958	0.006729	0.030849
264.22	0.063905	0.019242	0.006683	0.030965
264.42	0.063913	0.019043	0.006948	0.030736
264.62	0.064254	0.019395	0.007291	0.031268
264.82	0.064035	0.019419	0.006996	0.031472
265.02	0.064544	0.019637	0.006969	0.031628
265.22	0.06427	0.019183	0.006949	0.031481
265.42	0.064476	0.019549	0.006945	0.031564
265.62	0.064199	0.019441	0.007154	0.031285
265.82	0.064251	0.019046	0.006709	0.030952
266.02	0.064835	0.019079	0.00672	0.030611
266.22	0.064649	0.018484	0.006612	0.03056
266.42	0.064528	0.018042	0.006602	0.030501
266.62	0.064057	0.017979	0.006458	0.030467
266.82	0.064232	0.018171	0.006632	0.030332
267.02	0.064252	0.017962	0.006959	0.030357
267.22	0.064587	0.018096	0.007078	0.030562
267.42	0.06457	0.01827	0.006815	0.030779
267.62	0.064673	0.018398	0.007515	0.031273
267.82	0.064398	0.019102	0.00799	0.031693
268.02	0.064458	0.019288	0.007829	0.03212
268.22	0.065058	0.019727	0.008378	0.032285
268.42	0.065124	0.019815	0.008576	0.032451
268.62	0.065193	0.020091	0.008564	0.0327
268.82	0.065712	0.020414	0.008911	0.032908
269.02	0.066316	0.020801	0.009286	0.033337
269.22	0.066185	0.020789	0.009632	0.033259
269.42	0.065832	0.02068	0.009482	0.032886
269.62	0.065599	0.020378	0.010051	0.032223
269.82	0.065563	0.020238	0.01001	0.032511
270.02	0.065316	0.020282	0.010363	0.03225
270.22	0.065002	0.019974	0.010142	0.032146
270.42	0.064974	0.019498	0.010055	0.031722
270.62	0.064517	0.019384	0.009918	0.031682
270.82	0.0645	0.018952	0.009761	0.031174
271.02	0.064367	0.018279	0.0096	0.031131
271.22	0.064249	0.017576	0.009149	0.030503
271.42	0.063601	0.017152	0.008416	0.030109
271.62	0.062902	0.016414	0.008071	0.029939
271.82	0.06276	0.016699	0.007962	0.029962
272.02	0.062905	0.016635	0.00774	0.030146
272.22	0.062637	0.016532	0.007701	0.029735
272.42	0.062054	0.016354	0.006919	0.029199
272.62	0.062394	0.016599	0.007187	0.02954
272.82	0.062615	0.016918	0.007388	0.029642
273.02	0.062399	0.017138	0.007519	0.02951
273.22	0.06255	0.017496	0.008244	0.03011
273.42	0.062553	0.018024	0.008461	0.029966
273.62	0.062494	0.018253	0.00867	0.029718
273.82	0.062937	0.019113	0.009075	0.030467
274.02	0.062509	0.019061	0.008911	0.030046
274.22	0.062471	0.01896	0.008292	0.029913
274.42	0.062256	0.018662	0.007886	0.029794
274.62	0.061495	0.018079	0.007159	0.029679
274.82	0.060998	0.017492	0.006612	0.029241
275.02	0.060928	0.017037	0.006341	0.028906
275.22	0.060526	0.016584	0.005828	0.028186
275.42	0.060501	0.016497	0.00548	0.02788
275.62	0.060903	0.016523	0.005672	0.028405
275.82	0.061012	0.016549	0.006059	0.028384
276.02	0.061159	0.016528	0.006266	0.028375
276.22	0.061135	0.016505	0.006391	0.028528
276.42	0.060928	0.016477	0.006036	0.028535
276.62	0.061135	0.016854	0.007052	0.029214
276.82	0.06082	0.016787	0.00721	0.029081
277.02	0.061262	0.017111	0.007943	0.029542
277.22	0.061538	0.017328	0.008003	0.029842
277.42	0.06122	0.017469	0.007615	0.029618
277.62	0.061437	0.017347	0.007567	0.029969
277.82	0.061849	0.017921	0.00811	0.030558
278.02	0.061456	0.017518	0.0078	0.030401
278.22	0.061674	0.017321	0.007341	0.030411
278.42	0.061905	0.017198	0.007201	0.030364
278.62	0.061739	0.016943	0.007104	0.030291
278.82	0.061981	0.01728	0.007389	0.030303
279.02	0.062294	0.017645	0.00706	0.030131
279.22	0.06209	0.017931	0.006943	0.030138
279.42	0.062777	0.018265	0.007398	0.030279
279.62	0.062663	0.018013	0.007192	0.030206
279.82	0.061891	0.017895	0.006815	0.029596
280.02	0.061887	0.017906	0.007113	0.029666
280.22	0.061552	0.01787	0.007023	0.02979
280.42	0.061234	0.017892	0.006889	0.029771
280.62	0.060854	0.017406	0.006806	0.029654
280.82	0.060494	0.017482	0.006697	0.0298
281.02	0.060721	0.01762	0.006933	0.030474
281.22	0.060375	0.017248	0.006557	0.03066
281.42	0.060424	0.01739	0.006974	0.03149
281.62	0.061119	0.01752	0.007328	0.031998
281.82	0.061871	0.017735	0.007906	0.032239
282.02	0.061906	0.01736	0.008101	0.032071
282.22	0.062422	0.017444	0.008452	0.032049
282.42	0.062333	0.017142	0.008656	0.031958
282.62	0.062503	0.017339	0.008926	0.032414
282.82	0.06198	0.017288	0.008848	0.032186
283.02	0.061722	0.017347	0.008835	0.031781
283.22	0.061684	0.01766	0.009268	0.031827
283.42	0.06167	0.017994	0.009785	0.031465
283.62	0.061499	0.017845	0.009744	0.031259
283.82	0.061443	0.01795	0.009655	0.031113
284.02	0.0612	0.017609	0.009509	0.030828
284.22	0.061063	0.017259	0.008967	0.030528
284.42	0.061332	0.017095	0.008535	0.030378
284.62	0.060783	0.016527	0.008282	0.030044
284.82	0.060693	0.016812	0.008389	0.030186
285.02	0.061108	0.016709	0.008149	0.030372
285.22	0.060751	0.016364	0.007928	0.029943
285.42	0.060645	0.016236	0.007806	0.029714
285.62	0.061147	0.016386	0.007306	0.029382
285.82	0.060743	0.015613	0.007201	0.028606
286.02	0.059782	0.015153	0.007114	0.02793
286.22	0.059676	0.01559	0.007106	0.027811
286.42	0.059064	0.01533	0.007032	0.027987
286.62	0.059103	0.015756	0.007569	0.028169
286.82	0.058684	0.015795	0.007976	0.027983
287.02	0.059013	0.0163	0.00877	0.028305
287.22	0.059459	0.016929	0.009351	0.028568
287.42	0.059638	0.017462	0.009455	0.028509
287.62	0.060136	0.017706	0.009647	0.028831
287.82	0.060254	0.01802	0.00958	0.029026
288.02	0.060225	0.018498	0.008995	0.028932
288.22	0.060774	0.018784	0.009422	0.029239
288.42	0.060826	0.019	0.008964	0.029361
288.62	0.060623	0.019013	0.008941	0.029518
288.82	0.060705	0.018936	0.00853	0.029669
289.02	0.060423	0.01865	0.008037	0.029581
289.22	0.060002	0.018248	0.007709	0.029105
289.42	0.059729	0.017761	0.007218	0.028574
289.62	0.059832	0.017768	0.00706	0.028292
289.82	0.059297	0.017147	0.007007	0.02806
290.02	0.059348	0.017375	0.007588	0.028455
290.22	0.059185	0.017101	0.007613	0.028276
290.42	0.05862	0.0162	0.007647	0.028325
290.62	0.058515	0.015511	0.007636	0.027907
290.82	0.059123	0.015518	0.008094	0.028131
291.02	0.059492	0.015472	0.008328	0.028579
291.22	0.059959	0.015233	0.008509	0.028667
291.42	0.059915	0.015246	0.008119	0.028524
291.62	0.059931	0.01546	0.008493	0.029041
291.82	0.059624	0.015683	0.008244	0.029005
292.02	0.059562	0.015867	0.007988	0.028999
292.22	0.059318	0.015802	0.00862	0.029584
292.42	0.059457	0.016055	0.008508	0.029855
292.62	0.059773	0.01626	0.008659	0.030177
292.82	0.059866	0.016026	0.008406	0.030349
293.02	0.059981	0.016208	0.008422	0.030367
293.22	0.060044	0.016479	0.008194	0.029695
293.42	0.059492	0.016332	0.007933	0.029091
293.62	0.059672	0.016882	0.008423	0.029239
293.82	0.059811	0.017292	0.008852	0.029288
294.02	0.059563	0.017112	0.009072	0.029139
294.22	0.059181	0.016758	0.008777	0.028482
294.42	0.058745	0.016659	0.008376	0.028248
294.62	0.059209	0.016992	0.008307	0.028247
294.82	0.059717	0.017476	0.008634	0.028527
295.02	0.059347	0.017206	0.008373	0.028699
295.22	0.05924	0.017162	0.008161	0.028063
295.42	0.05909	0.017362	0.007537	0.027906
295.62	0.059223	0.018019	0.007939	0.028472
295.82	0.059018	0.01807	0.00807	0.028299
296.02	0.059369	0.018244	0.008461	0.028759
296.22	0.059435	0.018376	0.008772	0.029029
296.42	0.059869	0.018878	0.008973	0.029369
296.62	0.060059	0.018906	0.009005	0.02934
296.82	0.060141	0.018721	0.008985	0.029077
297.02	0.059937	0.018579	0.008813	0.029005
297.22	0.05955	0.018438	0.008453	0.028466
297.42	0.059426	0.018766	0.009031	0.028618
297.62	0.059727	0.01908	0.009612	0.028971
297.82	0.060227	0.019193	0.009842	0.029207
298.02	0.059991	0.019101	0.00965	0.02916
298.22	0.059734	0.01864	0.009219	0.029074
298.42	0.059865	0.018565	0.00902	0.029261
298.62	0.059838	0.018334	0.008685	0.028896
298.82	0.059759	0.018104	0.008614	0.028853
299.02	0.059513	0.017833	0.008327	0.028516
299.22	0.059582	0.017911	0.008271	0.028361
299.42	0.059635	0.017681	0.008432	0.028763
299.62	0.059214	0.017632	0.008896	0.028834
299.82	0.058668	0.017123	0.009143	0.028784
300.02	0.058735	0.017008	0.009106	0.028834
300.22	0.058772	0.016919	0.009221	0.028926
300.42	0.059024	0.017014	0.009549	0.029482
300.62	0.05882	0.016573	0.009424	0.028942
300.82	0.058647	0.016335	0.009601	0.029465
301.02	0.058417	0.016115	0.009748	0.029764
301.22	0.058095	0.01613	0.009581	0.029664
301.42	0.058613	0.016611	0.010269	0.029993
301.62	0.058634	0.016395	0.009935	0.029751
301.82	0.058389	0.01684	0.009403	0.029591
302.02	0.057811	0.017121	0.008741	0.029104
302.22	0.0578	0.016847	0.008533	0.028698
302.42	0.058207	0.017195	0.008739	0.02842
302.62	0.057997	0.017069	0.00807	0.027468
302.82	0.058457	0.017249	0.008354	0.027656
303.02	0.058422	0.017258	0.007991	0.02727
303.22	0.058731	0.017307	0.008189	0.027581
303.42	0.058728	0.016908	0.008089	0.02736
303.62	0.058267	0.016687	0.007678	0.027404
303.82	0.058506	0.016379	0.007692	0.027569
304.02	0.059344	0.016798	0.007704	0.028068
304.22	0.059635	0.016998	0.007941	0.028633
304.42	0.059703	0.016537	0.008077	0.028889
304.62	0.059253	0.016179	0.007848	0.02878
304.82	0.058928	0.015815	0.007961	0.029019
305.02	0.058593	0.015305	0.007343	0.028353
305.22	0.058284	0.015026	0.007268	0.028278
305.42	0.058124	0.015075	0.007032	0.028091
305.62	0.057201	0.014993	0.006257	0.027488
305.82	0.056723	0.015292	0.005762	0.027441
306.02	0.057017	0.015233	0.006298	0.027461
306.22	0.057199	0.015104	0.00684	0.027388
306.42	0.057446	0.015403	0.007201	0.027186
306.62	0.057273	0.015378	0.007414	0.026872
306.82	0.057789	0.015706	0.007936	0.027029
307.02	0.057903	0.015933	0.007635	0.026851
307.22	0.057948	0.015843	0.008216	0.02689
307.42	0.057961	0.015886	0.008568	0.027109
307.62	0.058272	0.01662	0.008679	0.027403
307.82	0.058817	0.01737	0.008781	0.027476
308.02	0.059735	0.018538	0.009246	0.027864
308.22	0.059501	0.018567	0.009376	0.027856
308.42	0.059284	0.018289	0.009453	0.027575
308.62	0.059005	0.018511	0.009614	0.027162
308.82	0.058445	0.018171	0.009115	0.026736
309.02	0.058544	0.018598	0.008959	0.026938
309.22	0.058224	0.018266	0.008631	0.026646
309.42	0.057849	0.018198	0.008064	0.026692
309.62	0.057291	0.017589	0.007383	0.026137
309.82	0.057331	0.017434	0.006975	0.025921
310.02	0.057458	0.017122	0.007311	0.02601
310.22	0.056907	0.016994	0.007041	0.025489
310.42	0.057211	0.01747	0.007123	0.02534
310.62	0.057389	0.017148	0.007348	0.025317
310.82	0.057806	0.016761	0.006935	0.025196
311.02	0.057568	0.016194	0.006748	0.02522
311.22	0.057826	0.015962	0.00719	0.025744
311.42	0.058457	0.016169	0.007564	0.026503
311.62	0.058733	0.016516	0.006884	0.026487
311.82	0.058854	0.016826	0.007372	0.026804
312.02	0.058797	0.016424	0.007361	0.026624
312.22	0.058343	0.016208	0.007758	0.026466
312.42	0.058271	0.016173	0.008052	0.026626
312.62	0.058404	0.016598	0.008459	0.027146
312.82	0.05803	0.016647	0.007954	0.027287
313.02	0.057906	0.017017	0.007891	0.027583
313.22	0.057658	0.016388	0.007262	0.027273
313.42	0.057712	0.016357	0.007232	0.027273
313.62	0.057699	0.016197	0.006997	0.026796
313.82	0.057806	0.016508	0.007295	0.026611
314.02	0.057852	0.016796	0.007713	0.027055
314.22	0.057437	0.017305	0.007428	0.027026
314.42	0.058019	0.017322	0.00766	0.027154
314.62	0.057711	0.016542	0.007526	0.027168
314.82	0.057565	0.016047	0.007315	0.027307
315.02	0.057413	0.015883	0.00761	0.027252
315.22	0.05749	0.015641	0.007816	0.027585
315.42	0.057414	0.015349	0.007955	0.027586
315.62	0.05674	0.014847	0.007716	0.02702
315.82	0.056707	0.015108	0.008309	0.027081
316.02	0.056398	0.014608	0.007754	0.026835
316.22	0.056619	0.015436	0.00859	0.027342
316.42	0.056693	0.015805	0.008781	0.028044
316.62	0.056686	0.015781	0.00858	0.028088
316.82	0.056316	0.015887	0.008174	0.027465
317.02	0.056415	0.015932	0.008085	0.027515
317.22	0.056878	0.016129	0.008197	0.027636
317.42	0.057011	0.016359	0.00846	0.027495
317.62	0.057224	0.016847	0.00868	0.027909
317.82	0.057008	0.016946	0.008496	0.028103
318.02	0.056757	0.017133	0.007815	0.028176
318.22	0.056069	0.016813	0.007112	0.027874
318.42	0.055908	0.016103	0.006863	0.027383
318.62	0.056012	0.016201	0.006678	0.027569
318.82	0.056165	0.016286	0.006762	0.027043
319.02	0.056231	0.016058	0.006724	0.026494
319.22	0.056283	0.015864	0.006878	0.02666
319.42	0.056736	0.015831	0.006976	0.026777
319.62	0.056441	0.015492	0.006802	0.026445
319.82	0.056829	0.015908	0.006809	0.026586
320.02	0.05704	0.015832	0.006947	0.026797
320.22	0.057374	0.01607	0.007659	0.027198
320.42	0.057999	0.016237	0.007867	0.027653
320.62	0.057871	0.015933	0.007592	0.027651
320.82	0.058254	0.016493	0.008122	0.027852
321.02	0.058328	0.016368	0.008204	0.028214
321.22	0.058266	0.016008	0.00816	0.028363
321.42	0.058494	0.016021	0.008229	0.028833
321.62	0.058274	0.015982	0.008239	0.029341
321.82	0.057733	0.015677	0.007906	0.029202
322.02	0.057065	0.015565	0.007559	0.028835
322.22	0.056733	0.015299	0.007622	0.028546
322.42	0.056875	0.015505	0.007858	0.028458
322.62	0.056966	0.015676	0.008078	0.028286
322.82	0.056654	0.015663	0.007941	0.027366
323.02	0.056201	0.015169	0.007895	0.026836
323.22	0.056355	0.015523	0.008145	0.026981
323.42	0.056119	0.014956	0.007475	0.026223
323.62	0.05593	0.014957	0.007207	0.026004
323.82	0.0564	0.015123	0.007308	0.025906
324.02	0.056249	0.015262	0.007035	0.025609
324.22	0.056176	0.015305	0.006719	0.02588
324.42	0.05609	0.01513	0.00633	0.02576
324.62	0.055725	0.01509	0.006064	0.025579
324.82	0.056384	0.015372	0.006188	0.025763
325.02	0.056013	0.015169	0.00585	0.026071
325.22	0.05614	0.014892	0.005687	0.026258
325.42	0.056293	0.015459	0.006021	0.027116
325.62	0.055834	0.015772	0.005888	0.027117
325.82	0.056136	0.016129	0.006029	0.027252
326.02	0.056085	0.016481	0.006667	0.027224
326.22	0.056241	0.016664	0.007102	0.027232
326.42	0.056212	0.017007	0.007522	0.027509
326.62	0.056041	0.016855	0.007819	0.027124
326.82	0.056071	0.017034	0.008319	0.026768
327.02	0.056258	0.01724	0.008611	0.026701
327.22	0.056559	0.01745	0.008606	0.026755
327.42	0.056378	0.016605	0.008208	0.025967
327.62	0.056742	0.016813	0.008329	0.02615
327.82	0.056684	0.016777	0.008267	0.025669
328.02	0.056224	0.016731	0.008023	0.0252
328.22	0.056256	0.016478	0.007576	0.025153
328.42	0.055818	0.016446	0.007732	0.024879
328.62	0.05563	0.016565	0.007613	0.024944
328.82	0.05598	0.01676	0.007533	0.02534
329.02	0.055541	0.01626	0.007053	0.025169
329.22	0.05505	0.016091	0.006511	0.024797
329.42	0.054626	0.01614	0.006068	0.024744
329.62	0.054466	0.016209	0.005776	0.024951
329.82	0.054725	0.016428	0.006164	0.025092
330.02	0.054617	0.016754	0.006185	0.025171
330.22	0.054902	0.016506	0.005958	0.025983
330.42	0.055098	0.016382	0.00585	0.026049
330.62	0.055284	0.016483	0.006065	0.02606
330.82	0.05562	0.016465	0.006011	0.026292
331.02	0.055854	0.016179	0.005951	0.026191
331.22	0.055559	0.01568	0.005772	0.026355
331.42	0.055525	0.014898	0.005558	0.026336
331.62	0.055424	0.014905	0.005718	0.026303
331.82	0.055636	0.014744	0.005774	0.026092
332.02	0.055598	0.014576	0.00611	0.026309
332.22	0.055535	0.014767	0.006368	0.026428
332.42	0.055567	0.014911	0.006956	0.027206
332.62	0.055525	0.014329	0.00659	0.027328
332.82	0.05569	0.014809	0.006648	0.027447
333.02	0.055305	0.014555	0.00655	0.027265
333.22	0.055208	0.014974	0.006462	0.027491
333.42	0.05519	0.014838	0.005897	0.027341
333.62	0.055428	0.015025	0.00611	0.027673
333.82	0.056219	0.01559	0.006603	0.027893
334.02	0.056503	0.015906	0.006444	0.027833
334.22	0.056641	0.015474	0.006134	0.027916
334.42	0.056828	0.016055	0.006172	0.0277
334.62	0.056571	0.016203	0.006664	0.027601
334.82	0.056557	0.01638	0.006763	0.027573
335.02	0.056224	0.016504	0.007101	0.027524
335.22	0.056057	0.016592	0.006574	0.027343
335.42	0.056048	0.016293	0.006457	0.027226
335.62	0.055803	0.016459	0.006636	0.026668
335.82	0.056336	0.016782	0.00664	0.026146
336.02	0.055926	0.017193	0.006956	0.026002
336.22	0.056077	0.017565	0.007235	0.026095
336.42	0.055562	0.017246	0.006405	0.025838
336.62	0.055319	0.017378	0.005843	0.025243
336.82	0.055783	0.017982	0.006337	0.02545
337.02	0.056437	0.017907	0.006342	0.025478
337.22	0.056611	0.017905	0.005823	0.025459
337.42	0.05638	0.017415	0.005421	0.024905
337.62	0.056955	0.017277	0.005939	0.025164
337.82	0.057183	0.016961	0.00634	0.025551
338.02	0.057076	0.016503	0.006208	0.02517
338.22	0.056697	0.015693	0.006185	0.024919
338.42	0.056558	0.015303	0.006476	0.025538
338.62	0.056381	0.014725	0.007017	0.025384
338.82	0.056273	0.014773	0.007049	0.02581
339.02	0.0561	0.014279	0.007083	0.02624
339.22	0.056076	0.014133	0.006902	0.026207
339.42	0.055828	0.014423	0.00675	0.026656
339.62	0.055833	0.014942	0.006958	0.026625
339.82	0.055921	0.015401	0.007229	0.026677
340.02	0.055455	0.015661	0.007221	0.026639
340.22	0.05516	0.016148	0.007217	0.027119
340.42	0.054982	0.016751	0.006872	0.027125
340.62	0.05581	0.017632	0.007217	0.027565
340.82	0.056532	0.018154	0.00775	0.027993
341.02	0.056603	0.018271	0.007509	0.027916
341.22	0.05653	0.018335	0.007128	0.028121
341.42	0.056822	0.018281	0.00747	0.028161
341.62	0.056864	0.017891	0.007725	0.027959
341.82	0.056692	0.017519	0.007654	0.027653
342.02	0.056782	0.017474	0.007921	0.027196
342.22	0.056247	0.016534	0.00833	0.026722
342.42	0.056214	0.016518	0.008574	0.027085
342.62	0.05612	0.016488	0.008942	0.026668
342.82	0.055581	0.016183	0.008883	0.026442
343.02	0.055504	0.016117	0.008964	0.026564
343.22	0.055787	0.016401	0.008817	0.026901
343.42	0.055683	0.016339	0.008795	0.027305
343.62	0.055367	0.01596	0.00829	0.02701
343.82	0.055209	0.015947	0.008383	0.027304
344.02	0.054789	0.015807	0.007898	0.026891
344.22	0.054267	0.016078	0.007658	0.027185
344.42	0.05435	0.016423	0.007426	0.027173
344.62	0.054343	0.016259	0.007022	0.027029
344.82	0.054329	0.016118	0.006974	0.027163
345.02	0.054388	0.016001	0.007145	0.027334
345.22	0.054466	0.015987	0.007002	0.027374
345.42	0.054406	0.015886	0.006915	0.027284
345.62	0.054428	0.015574	0.006798	0.026519
345.82	0.054159	0.015634	0.006913	0.026136
346.02	0.054334	0.015758	0.00772	0.026416
346.22	0.054585	0.015811	0.008459	0.026544
346.42	0.054877	0.016433	0.008564	0.027069
346.62	0.055077	0.016167	0.008654	0.027144
346.82	0.055095	0.015996	0.008702	0.027135
347.02	0.054891	0.015834	0.008434	0.027215
347.22	0.054615	0.015289	0.007811	0.027047
347.42	0.054178	0.014799	0.007546	0.026447
347.62	0.053258	0.014192	0.006687	0.025533
347.82	0.053474	0.014481	0.007247	0.025842
348.02	0.05295	0.014056	0.006792	0.025289
348.22	0.052482	0.014069	0.006451	0.025285
348.42	0.052648	0.014173	0.006151	0.025215
348.62	0.053108	0.014354	0.006203	0.025318
348.82	0.053409	0.014877	0.006565	0.025034
349.02	0.053724	0.015671	0.006962	0.025247
349.22	0.053857	0.015947	0.006708	0.025218
349.42	0.054152	0.016425	0.006816	0.025435
349.62	0.054809	0.017059	0.00691	0.025644
349.82	0.054985	0.017481	0.007543	0.026151
350.02	0.055328	0.017397	0.007429	0.026523
350.22	0.055696	0.017714	0.007796	0.026796
350.42	0.055856	0.017877	0.007859	0.027419
350.62	0.055735	0.017826	0.007718	0.027513
350.82	0.055089	0.017611	0.007576	0.027481
351.02	0.054395	0.017317	0.007279	0.027266
351.22	0.054273	0.01709	0.007222	0.027071
351.42	0.05438	0.016923	0.007692	0.027133
351.62	0.054152	0.016203	0.008036	0.026816
351.82	0.05429	0.015696	0.00807	0.026952
352.02	0.053934	0.015203	0.007649	0.026771
352.22	0.053715	0.015023	0.007677	0.026607
352.42	0.053963	0.015075	0.008187	0.026251
352.62	0.05428	0.015388	0.008902	0.026145
352.82	0.054024	0.0153	0.009125	0.025527
353.02	0.054536	0.015805	0.009696	0.025805
353.22	0.054822	0.015849	0.009708	0.025779
353.42	0.055082	0.016374	0.009799	0.02559
353.62	0.054936	0.016197	0.00918	0.025284
353.82	0.055115	0.015868	0.009027	0.025229
354.02	0.055172	0.015707	0.008627	0.024926
354.22	0.055019	0.015793	0.008541	0.024868
354.42	0.055217	0.016092	0.008381	0.025289
354.62	0.054925	0.016342	0.008241	0.025525
354.82	0.054897	0.016634	0.008743	0.026001
355.02	0.05517	0.016944	0.008987	0.026349
355.22	0.055245	0.016816	0.008898	0.026307
355.42	0.055639	0.016576	0.008805	0.026536
355.62	0.055318	0.016017	0.008775	0.02638
355.82	0.055058	0.015881	0.008798	0.026907
356.02	0.054991	0.01603	0.008936	0.026916
356.22	0.054508	0.015706	0.009423	0.026836
356.42	0.054051	0.015591	0.009673	0.026698
356.62	0.054043	0.015582	0.00977	0.026712
356.82	0.053722	0.015581	0.009552	0.026095
357.02	0.05396	0.015801	0.009675	0.025824
357.22	0.053362	0.015325	0.008978	0.025107
357.42	0.053194	0.015545	0.008826	0.024578
357.62	0.05301	0.015337	0.00852	0.024557
357.82	0.053441	0.015876	0.008665	0.024806
358.02	0.053345	0.01597	0.008499	0.024387
358.22	0.053128	0.015791	0.008185	0.024108
358.42	0.053923	0.016072	0.008739	0.024721
358.62	0.053922	0.016281	0.008913	0.024827
358.82	0.054334	0.016355	0.00889	0.025068
359.02	0.054426	0.016279	0.008573	0.024993
359.22	0.055068	0.016336	0.008657	0.025457
359.42	0.055644	0.016201	0.008927	0.02596
359.62	0.055668	0.016003	0.009399	0.026097
359.82	0.055594	0.016327	0.009616	0.026139
360.02	0.055312	0.016193	0.008919	0.025924
360.22	0.054593	0.015719	0.008154	0.02577
360.42	0.05456	0.015946	0.007654	0.025998
360.62	0.054998	0.016263	0.007531	0.02593
360.82	0.054894	0.016163	0.006766	0.025785
361.02	0.054955	0.016288	0.006423	0.025741
361.22	0.054673	0.016374	0.006502	0.025315
361.42	0.054809	0.017095	0.006478	0.025534
361.62	0.054572	0.017292	0.006437	0.025541
361.82	0.054237	0.017776	0.006415	0.025068
362.02	0.05411	0.017594	0.005789	0.024828
362.22	0.054398	0.017596	0.00587	0.02521
362.42	0.054444	0.017508	0.00616	0.025527
362.62	0.054169	0.017582	0.006199	0.025532
362.82	0.054255	0.017611	0.006803	0.02599
363.02	0.054543	0.017761	0.007555	0.026325
363.22	0.055048	0.017778	0.008447	0.026788
363.42	0.054623	0.016842	0.008132	0.026221
363.62	0.053872	0.016163	0.007803	0.025549
363.82	0.053848	0.016115	0.007759	0.025533
364.02	0.053643	0.015432	0.007337	0.025234
364.22	0.053068	0.014539	0.006835	0.024709
364.42	0.053397	0.015008	0.006815	0.024882
364.62	0.053687	0.014828	0.006799	0.024699
364.82	0.053379	0.014246	0.006227	0.024103
365.02	0.053654	0.015077	0.006939	0.024522
365.22	0.05331	0.014922	0.007118	0.023828
365.42	0.052885	0.015171	0.006742	0.023518
365.62	0.052563	0.015592	0.006842	0.023231
365.82	0.052778	0.016179	0.006961	0.02342
366.02	0.052997	0.016207	0.006638	0.023499
366.22	0.053304	0.016536	0.007081	0.024082
366.42	0.053747	0.017183	0.00774	0.024585
366.62	0.053543	0.017769	0.007883	0.025264
366.82	0.054028	0.017691	0.008297	0.025731
367.02	0.054331	0.017545	0.008582	0.026671
367.22	0.054324	0.017359	0.008619	0.02706
367.42	0.054273	0.016905	0.00836	0.027291
367.62	0.05441	0.017014	0.008788	0.027727
367.82	0.054676	0.017159	0.009166	0.028301
368.02	0.054343	0.016906	0.008882	0.027983
368.22	0.05396	0.016474	0.008549	0.02831
368.42	0.054015	0.016936	0.008594	0.028296
368.62	0.053978	0.016689	0.008775	0.028227
368.82	0.05372	0.016367	0.008492	0.028097
369.02	0.053959	0.016646	0.009052	0.028642
369.22	0.053479	0.01579	0.00822	0.027505
369.42	0.053334	0.015676	0.007715	0.027164
369.62	0.053788	0.016105	0.007953	0.026998
369.82	0.054258	0.016284	0.008052	0.027032
370.02	0.054658	0.01607	0.007823	0.026243
370.22	0.054929	0.016693	0.007916	0.026635
370.42	0.054953	0.017069	0.008098	0.02649
370.62	0.054682	0.017135	0.00825	0.026422
370.82	0.05505	0.016718	0.008482	0.026213
371.02	0.055164	0.017132	0.008303	0.026726
371.22	0.054755	0.01715	0.008199	0.026385
371.42	0.054812	0.017063	0.008724	0.026415
371.62	0.054789	0.017793	0.009292	0.02654
371.82	0.054188	0.017861	0.009179	0.026356
372.02	0.05387	0.017735	0.008994	0.025658
372.22	0.053431	0.017452	0.008772	0.025363
372.42	0.053148	0.017351	0.00834	0.024427
372.62	0.053181	0.017432	0.008237	0.024645
372.82	0.053074	0.016834	0.007943	0.024676
373.02	0.052789	0.016623	0.007682	0.024518
373.22	0.052759	0.016199	0.007169	0.024155
373.42	0.052871	0.016196	0.007213	0.024428
373.62	0.053223	0.016305	0.007501	0.024737
373.82	0.053286	0.016629	0.007548	0.024923
374.02	0.053257	0.016496	0.007591	0.024915
374.22	0.052416	0.016449	0.007092	0.024685
374.42	0.052099	0.016307	0.006992	0.024441
374.62	0.052448	0.016442	0.006935	0.024883
374.82	0.05216	0.016254	0.006412	0.02484
375.02	0.051981	0.016134	0.006264	0.025221
375.22	0.051515	0.015687	0.006657	0.025447
375.42	0.051843	0.01585	0.007307	0.02579
375.62	0.051978	0.016743	0.007494	0.025764
375.82	0.051647	0.01647	0.007095	0.025545
376.02	0.05154	0.01632	0.006962	0.025258
376.22	0.051535	0.016583	0.006776	0.025319
376.42	0.051735	0.016694	0.006775	0.025756
376.62	0.051878	0.016966	0.007397	0.026325
376.82	0.052079	0.017001	0.007842	0.026293
377.02	0.052394	0.017015	0.007563	0.026233
377.22	0.052602	0.016491	0.007521	0.026127
377.42	0.052986	0.016844	0.007826	0.026234
377.62	0.05337	0.017195	0.008271	0.026165
377.82	0.053193	0.01727	0.008671	0.025667
378.02	0.053174	0.017052	0.008557	0.025316
378.22	0.053209	0.016415	0.008217	0.024898
378.42	0.053303	0.016062	0.008181	0.024674
378.62	0.053136	0.015982	0.007769	0.024179
378.82	0.05265	0.015945	0.007843	0.023995
379.02	0.052899	0.016031	0.00828	0.024347
379.22	0.053067	0.016111	0.008432	0.024583
379.42	0.053163	0.0162	0.008478	0.024705
379.62	0.053149	0.016552	0.008738	0.024725
379.82	0.052756	0.016	0.008644	0.024714
380.02	0.052851	0.016415	0.009344	0.025174
380.22	0.05259	0.016478	0.009405	0.025412
380.42	0.053036	0.016225	0.009736	0.02582
380.62	0.052869	0.016114	0.009515	0.025664
380.82	0.052947	0.016221	0.009106	0.025446
381.02	0.052972	0.016131	0.008698	0.025479
381.22	0.05257	0.015966	0.008443	0.025822
381.42	0.05282	0.016593	0.00905	0.025975
381.62	0.052685	0.016224	0.008514	0.025968
381.82	0.052349	0.015495	0.007989	0.025552
382.02	0.052693	0.015528	0.007733	0.025482
382.22	0.052844	0.015338	0.007777	0.025214
382.42	0.052473	0.015441	0.007199	0.024719
382.62	0.052712	0.016197	0.007097	0.024925
382.82	0.052785	0.016763	0.007715	0.025497
383.02	0.053003	0.016791	0.008024	0.025702
383.22	0.052894	0.016525	0.008027	0.025636
383.42	0.053162	0.016861	0.008303	0.025972
383.62	0.053659	0.017191	0.009152	0.02599
383.82	0.053571	0.017059	0.009362	0.025666
384.02	0.053817	0.017509	0.01012	0.025982
384.22	0.053386	0.016902	0.009742	0.02541
384.42	0.053381	0.016774	0.009599	0.025288
384.62	0.052526	0.016415	0.009098	0.024817
384.82	0.052157	0.016401	0.009291	0.024325
385.02	0.052017	0.016659	0.009752	0.024655
385.22	0.052075	0.01668	0.009795	0.02461
385.42	0.051816	0.016358	0.009611	0.024054
385.62	0.051635	0.015816	0.009251	0.023668
385.82	0.051661	0.015943	0.009429	0.023309
386.02	0.051914	0.016217	0.009284	0.02306
386.22	0.052266	0.016501	0.009419	0.023215
386.42	0.052402	0.016883	0.009261	0.023482
386.62	0.052597	0.017281	0.00974	0.024303
386.82	0.05253	0.017449	0.010147	0.024513
387.02	0.052411	0.017041	0.009914	0.024965
387.22	0.052528	0.017175	0.009489	0.025468
387.42	0.05275	0.017295	0.009346	0.025765
387.62	0.052951	0.017046	0.009553	0.025764
387.82	0.052389	0.01644	0.008725	0.025545
388.02	0.052317	0.01634	0.008361	0.025546
388.22	0.051824	0.01577	0.007771	0.025157
388.42	0.051684	0.016066	0.007519	0.025249
388.62	0.051444	0.016389	0.007697	0.025334
388.82	0.05151	0.016491	0.008223	0.025389
389.02	0.051713	0.016664	0.008518	0.025701
389.22	0.052282	0.016723	0.008607	0.025452
389.42	0.051887	0.016478	0.008766	0.025628
389.62	0.051859	0.016559	0.008906	0.025395
389.82	0.052279	0.016916	0.009099	0.025638
390.02	0.052149	0.016901	0.008874	0.025526
390.22	0.052391	0.01706	0.00925	0.025821
390.42	0.052623	0.017493	0.009494	0.025992
390.62	0.053035	0.017955	0.009946	0.02645
390.82	0.05294	0.017633	0.010154	0.026358
391.02	0.052729	0.01732	0.009857	0.026367
391.22	0.052785	0.01724	0.010129	0.026355
391.42	0.053057	0.016812	0.010168	0.026159
391.62	0.053288	0.016701	0.010044	0.026221
391.82	0.05315	0.016672	0.009538	0.026155
392.02	0.052953	0.016551	0.009363	0.025746
392.22	0.053375	0.016536	0.009334	0.025869
392.42	0.053316	0.01702	0.009385	0.025569
392.62	0.053173	0.016661	0.009128	0.025701
392.82	0.052969	0.01593	0.009293	0.025556
393.02	0.053197	0.016219	0.009255	0.025906
393.22	0.05299	0.016258	0.00944	0.026055
393.42	0.052191	0.01621	0.009264	0.02626
393.62	0.05157	0.01605	0.008744	0.025859
393.82	0.051576	0.016065	0.008746	0.026148
394.02	0.051027	0.016149	0.008091	0.025611
394.22	0.051415	0.01618	0.008115	0.025615
394.42	0.051365	0.016327	0.007741	0.02537
394.62	0.051727	0.016734	0.007686	0.025682
394.82	0.05137	0.015954	0.007476	0.025248
395.02	0.051126	0.015631	0.007047	0.024716
395.22	0.050999	0.015446	0.006875	0.024747
395.42	0.051517	0.015336	0.006484	0.025061
395.62	0.051444	0.01547	0.006075	0.02503
395.82	0.051507	0.015552	0.006094	0.025047
396.02	0.051205	0.01516	0.005661	0.024422
396.22	0.051262	0.015008	0.005734	0.024485
396.42	0.050617	0.01495	0.005867	0.024018
396.62	0.050906	0.014891	0.006157	0.024392
396.82	0.050617	0.014919	0.006554	0.024397
397.02	0.050533	0.015564	0.007003	0.024581
397.22	0.050139	0.01547	0.007291	0.024661
397.42	0.049752	0.015163	0.006884	0.024517
397.62	0.049563	0.01525	0.007186	0.024501
397.82	0.049876	0.015535	0.00714	0.024523
398.02	0.049742	0.015776	0.007269	0.024097
398.22	0.050021	0.015812	0.007186	0.024293
398.42	0.049664	0.015759	0.006374	0.024073
398.62	0.049658	0.015781	0.006524	0.023966
398.82	0.049329	0.015788	0.006652	0.023569
399.02	0.049293	0.015729	0.006374	0.023215
399.22	0.049811	0.016266	0.006775	0.02328
399.42	0.050429	0.016787	0.006929	0.023547
[truncated: 1,752 more rows]

## Sheet: Figure 4
Figure 4B %of PLTs adherent to KCs/LSECs					Figure 4C % of liver NPCs			Figure 4C Platelet counts/mm2			Figure 4D % of liver NPCs			Figure 4D Platelet counts/mm2			Figure4E ALT(IU/L)
PLTs-KCs		PLTs-LSECs			PBS	CLDN		PBS	CLDN		PBS	CLDN		PBS	CLDN		Previous		New
PBS	APAP	PBS	APAP		15	29		1718.33	4107.53		15	1		1853.68	88.2706		PBS	CLDN	PBS	CLDN
50	80	50	20		18	32		1294.64	3507.29		17	0.5		1641.83	35.3082		3206.9	430.631	3114.63	16774.5
43.4783	66.6667	56.5217	33.3333		20	27		1393.5	4242.87		21	2		2142.03	123.579		6213.42	521.25	3195.74	8933.75
31.8182	66.6667	68.1818	33.3333														2080.74	381.469	5873.85	8981.01
38.4615	61.5385	61.5385	38.4615														10187.5	551.25	3192.74	10969.8
45.4545	50	54.5455	50														3547.31			17529.4
47.0588	65	52.9412	35														7071.14			11302.8
47.0588																	2025.37
																	11687.5

## Sheet: Figure 5
Figure 5A Relative mRNA expression fold change over WT									Figure 5B Relative Pdpn mRNA expression fold change over WT naïve KC
	WT		Chil1-/-		Cd44-/-				WT		Chil1-/-				Cd44-/-
Psgl-1	1	0.9	1.01396	1.02101	1.36604	1.59107					PBS		rmChi3l1		PBS		rmChi3l1
Cd40	ND	ND	ND	ND	ND	ND			3	3.63	0.08931	0.012912	3.75148	3.67456	0.102591	0.442872	0.267456	0.259763
Mcam	1	0.99	1.54757	1.65864	1.85318	1.22264
Icam-1	1	1.02	0.150726	0.133046	0.486327	0.392292
Fcr	1	1.2	1.0733	1.56917	1.18099	1.01396
Lfa1	1	1.3	1.25701	1.31039	1.82766	1.60214			Figure 5C % of MΦs express podoplanin
Vwf	ND	ND	ND	ND	ND	ND			WT		Chil1-/-				Cd44-/-
Pdpn	1	1.21	0.02977	0.004304	0.034197	0.147624					PBS		rmChi3l1		PBS		rmChi3l1
						ND indicates for non detected			50		0		40		0		0
									41.6667		0		33.3333		0		0
									38.4615		0		41.6667		0		0
									41.6667		0		60		0		0
									54.5455		0		45.4545		0		0
									Figure 5D ALT(IU/L)
									Ctrl IgG	α-podoplanin Ab
									5290.09	2799.06
									5745.3	1203.15
									9294.85	2009.71
									6079.22	3519.07
									5244.47	2252.9
									6658.21	2178.71

## Sheet: Figure 6
Figure 6B ALT(IU/L)				Figure 6E ALT(IU/L)
Ctrl IgG	α-mChi3l1 Ab			PBS	rhChi3l1	rhChi3l1+Ctrl IgG	rhChi3l1+α-hChi3l1 Ab
10050.5	470.252			61.83	6190.25	4196.6	111.04
9971	3824.94			125	4433.06	5640.6	1.955
9758.5	75.82			16.66	6625.06	8134	188.88
10861.5	55.15			996.07	2755.08	3498	389.46
	73.88			196.54	7836.1	8017.6	10.65
	109.63					7831.8	9.9

## Sheet: Figure3-figure supplement 1
Figure 3-figure supplement 1A ALT(IU/L)
Ctrl IgG	α-CD44 Ab
5359.05	26.522
11025	68.908
6412.5	23.208
11025	20.229
9187.5

## Sheet: Figure 3-figure supplement 2
Figure 3-figure supplement 2A GSH(nmol/mg) in liver
	WT			Chil1-/-			Cd44-/-
Cont	7.31432	6.5934	7.30792	7.66368	7.16032	7.2414	7.6102	6.74314	7.07684
2h	1.24216	1.82828	1.13928	1.65176	1.06976	1.6214	1.16288	1.0633	1.90266
6h	6.40916	10.0554	6.18508	10.1556	9.29412	7.96212	8.92876	7.86966	9.91638
24h	9.50424	10.8988	12.3535	12.0307	11.1332	14.2673	10.8078	11.2575	13.5122

## Sheet: figure supplement 5
figure supplement 5
	WT										Chil1-/-										Cd44-/-
6h	4175.6	11500	4618.4	5457.7	3576.15	10500	4919.55	5928.75			76.26	3400	3200	73.8	94.66	4200	1583.35	116.85			772.8	853.7	806.3	879	797.56	832.62
24h	1463.6	4595.15	2811.3	3288.1	1471.25	5068.7	2822.05	3335.95			247.73	1173.32	1403.49	301.3	231.4	1121.77	1481.38	251.32			1843.12	1648.9	2001.44	1828.24	1480.06	2186.3
