# Supplementary material for: Chitinase 3-like-1 contributes to acetaminophen-induced liver injury by promoting hepatic platelet recruitment
Source: eLife. 2021 Jun 10;10:e68571. doi: 10.7554/eLife.68571 (PMC8233036; doi:10.7554/eLife.68571)
Supplement: Supplementary file 1. — Non-parenchymal cells were isolated from C57B/6 mice treated with acetaminophen (APAP) for 3 hr and the cell lysate was incubated with rmChi3l1 overnight. Proteins potentially bound to rmChi3l1 were immune-precipitated with an anti-His antibody and subjected to mass spectrometry analyses. [file elife-68571-supp1.xlsx]

## Sheet: Ctrl IgG
Ctr-1igG
		Score	Mass	Matches	Sequences	emPAI
1.1	sp|Q8C196|CPSM_MOUSE	999	165711	73 (66)	41 (37)	1.6	Carbamoyl-phosphate synthase [ammonia], mitochondrial OS=Mus musculus GN=Cps1 PE=1 SV=2
1.2	tr|Q561M8|Q561M8_MOUSE	198	32352	13 (11)	9 (8)	1.41	Cps1 protein (Fragment) OS=Mus musculus GN=Cps1 PE=2 SV=1
2	tr|A8DUK2|A8DUK2_MOUSE	484	16280	15 (15)	5 (5)	2.75	Beta-globin OS=Mus musculus GN=Hbbt1 PE=3 SV=1
3	sp|Q61362|CH3L1_MOUSE	367	44150	15 (13)	7 (7)	0.91	Chitinase-3-like protein 1 OS=Mus musculus GN=Chi3l1 PE=1 SV=3
4	tr|Q3UJ34|Q3UJ34_MOUSE	313	46840	24 (19)	12 (11)	1.78	MCG19004 OS=Mus musculus GN=Ass1 PE=1 SV=1
5	tr|Q3TJ66|Q3TJ66_MOUSE	304	39952	18 (14)	10 (9)	1.4	Fructose-bisphosphate aldolase OS=Mus musculus GN=Aldob PE=2 SV=1
6.1	tr|Q4KL81|Q4KL81_MOUSE	294	42108	17 (14)	13 (11)	1.48	Actin, gamma, cytoplasmic 1 OS=Mus musculus GN=Actg1 PE=2 SV=1
6.2	sp|P60710|ACTB_MOUSE	253	42052	17 (14)	13 (11)	1.48	Actin, cytoplasmic 1 OS=Mus musculus GN=Actb PE=1 SV=1
7	sp|Q8R0Y6|AL1L1_MOUSE	269	99502	16 (12)	10 (7)	0.3	Cytosolic 10-formyltetrahydrofolate dehydrogenase OS=Mus musculus GN=Aldh1l1 PE=1 SV=1
8	sp|Q8BWT1|THIM_MOUSE	240	42260	12 (12)	9 (9)	1.12	3-ketoacyl-CoA thiolase, mitochondrial OS=Mus musculus GN=Acaa2 PE=1 SV=3
9	sp|O35490|BHMT1_MOUSE	235	45448	16 (13)	11 (10)	1.02	Betaine--homocysteine S-methyltransferase 1 OS=Mus musculus GN=Bhmt PE=1 SV=1
10	sp|P56480|ATPB_MOUSE	235	56265	17 (15)	8 (8)	0.87	ATP synthase subunit beta, mitochondrial OS=Mus musculus GN=Atp5b PE=1 SV=2
11	sp|P63038|CH60_MOUSE	234	61088	6 (6)	4 (4)	0.37	60 kDa heat shock protein, mitochondrial OS=Mus musculus GN=Hspd1 PE=1 SV=1
12	sp|P05202|AATM_MOUSE	229	47780	12 (10)	8 (7)	0.71	Aspartate aminotransferase, mitochondrial OS=Mus musculus GN=Got2 PE=1 SV=1
13	sp|P19157|GSTP1_MOUSE	210	23765	6 (5)	2 (2)	0.3	Glutathione S-transferase P 1 OS=Mus musculus GN=Gstp1 PE=1 SV=2
14.1	tr|Q32P04|Q32P04_MOUSE	204	61957	11 (8)	4 (4)	0.23	Keratin 5 OS=Mus musculus GN=Krt5 PE=1 SV=2
14.2	sp|P04104|K2C1_MOUSE	182	66079	10 (9)	3 (3)	0.21	Keratin, type II cytoskeletal 1 OS=Mus musculus GN=Krt1 PE=1 SV=4
14.3	sp|Q8VED5|K2C79_MOUSE	96	57802	3 (3)	2 (2)	0.12	Keratin, type II cytoskeletal 79 OS=Mus musculus GN=Krt79 PE=1 SV=2
14.4	sp|Q6NXH9|K2C73_MOUSE	88	59502	4 (4)	2 (2)	0.18	Keratin, type II cytoskeletal 73 OS=Mus musculus GN=Krt73 PE=1 SV=1
14.5	sp|P11679|K2C8_MOUSE	34	54531	2 (2)	2 (2)	0.12	Keratin, type II cytoskeletal 8 OS=Mus musculus GN=Krt8 PE=1 SV=4
15	tr|Q3V2F7|Q3V2F7_MOUSE	185	14294	8 (7)	5 (5)	2.6	Fatty acid binding protein 1, liver OS=Mus musculus GN=Fabp1 PE=1 SV=1
16.1	sp|Q61781|K1C14_MOUSE	185	53176	8 (8)	6 (6)	0.43	Keratin, type I cytoskeletal 14 OS=Mus musculus GN=Krt14 PE=1 SV=2
16.2	sp|P02535|K1C10_MOUSE	149	57906	8 (8)	6 (6)	0.39	Keratin, type I cytoskeletal 10 OS=Mus musculus GN=Krt10 PE=1 SV=3
16.3	sp|Q6IFX2|K1C42_MOUSE	147	50444	6 (6)	4 (4)	0.29	Keratin, type I cytoskeletal 42 OS=Mus musculus GN=Krt42 PE=1 SV=1
16.4	sp|Q9Z2K1|K1C16_MOUSE	83	51973	6 (6)	4 (4)	0.36	Keratin, type I cytoskeletal 16 OS=Mus musculus GN=Krt16 PE=1 SV=3
16.5	sp|P05784|K1C18_MOUSE	43	47509	4 (3)	3 (2)	0.14	Keratin, type I cytoskeletal 18 OS=Mus musculus GN=Krt18 PE=1 SV=5
17	sp|Q03265|ATPA_MOUSE	156	59830	20 (12)	16 (10)	0.71	ATP synthase subunit alpha, mitochondrial OS=Mus musculus GN=Atp5a1 PE=1 SV=1
18	tr|A8DUV3|A8DUV3_MOUSE	154	15133	11 (10)	3 (3)	1.25	Alpha-globin OS=Mus musculus GN=Hbat1 PE=3 SV=1
19	tr|Q3TUU3|Q3TUU3_MOUSE	152	42513	5 (4)	4 (3)	0.25	Uncharacterized protein (Fragment) OS=Mus musculus GN=Acaa1b PE=2 SV=1
20	sp|Q9QXD6|F16P1_MOUSE	148	37288	6 (6)	5 (5)	0.53	Fructose-1,6-bisphosphatase 1 OS=Mus musculus GN=Fbp1 PE=1 SV=3
21	tr|Q8R1A8|Q8R1A8_MOUSE	145	39511	8 (7)	4 (4)	0.76	Ornithine carbamoyltransferase, mitochondrial OS=Mus musculus GN=Otc PE=1 SV=1
22	tr|Q545A2|Q545A2_MOUSE	140	33138	3 (3)	1 (1)	0.21	MCG11560 OS=Mus musculus GN=Slc25a5 PE=1 SV=1
23	tr|Q3TVM2|Q3TVM2_MOUSE	117	57073	10 (10)	6 (6)	0.57	Uncharacterized protein OS=Mus musculus GN=Aldh2 PE=2 SV=1
24	sp|P35505|FAAA_MOUSE	117	46488	6 (5)	5 (4)	0.32	Fumarylacetoacetase OS=Mus musculus GN=Fah PE=1 SV=2
25	tr|Q3TQP7|Q3TQP7_MOUSE	114	45115	6 (5)	4 (3)	0.33	Uncharacterized protein OS=Mus musculus GN=Acat1 PE=2 SV=1
26	sp|Q99LC5|ETFA_MOUSE	114	35330	5 (4)	4 (3)	0.43	Electron transfer flavoprotein subunit alpha, mitochondrial OS=Mus musculus GN=Etfa PE=1 SV=2
27	tr|A2AFW6|A2AFW6_MOUSE	114	32951	2 (2)	1 (1)	0.21	Mitochondrial carrier homolog 2 OS=Mus musculus GN=Mtch2 PE=1 SV=1
28	tr|A0A0A0MQF6|A0A0A0MQF6_MOUSE	112	38914	7 (6)	4 (4)	0.5	Glyceraldehyde-3-phosphate dehydrogenase OS=Mus musculus GN=Gapdh PE=1 SV=1
29	sp|Q9QXF8|GNMT_MOUSE	109	33110	3 (2)	3 (2)	0.21	Glycine N-methyltransferase OS=Mus musculus GN=Gnmt PE=1 SV=3
30	sp|Q64374|RGN_MOUSE	109	33899	5 (5)	3 (3)	0.45	Regucalcin OS=Mus musculus GN=Rgn PE=1 SV=1
31	tr|Q543J0|Q543J0_MOUSE	106	35245	15 (14)	5 (5)	0.87	Uricase OS=Mus musculus GN=Uox PE=1 SV=1
32	tr|Q6ZWZ6|Q6ZWZ6_MOUSE	105	14905	3 (3)	1 (1)	0.85	40S ribosomal protein S12 OS=Mus musculus GN=Rps12 PE=1 SV=1
33	tr|A0A0R4J135|A0A0R4J135_MOUSE	102	53165	4 (4)	4 (4)	0.27	Selenium-binding protein 2 OS=Mus musculus GN=Selenbp2 PE=1 SV=1
34	tr|H7BXC3|H7BXC3_MOUSE	95	18100	4 (4)	3 (3)	0.67	Triosephosphate isomerase OS=Mus musculus GN=Tpi1 PE=1 SV=1
35	tr|B2RTP7|B2RTP7_MOUSE	92	71336	3 (3)	2 (2)	0.09	Krt2 protein OS=Mus musculus GN=Krt2 PE=2 SV=1
36	tr|Q3TF14|Q3TF14_MOUSE	92	48170	8 (6)	6 (6)	0.49	Adenosylhomocysteinase OS=Mus musculus GN=Ahcy PE=1 SV=1
37	sp|P97807|FUMH_MOUSE	91	54550	2 (2)	2 (2)	0.12	Fumarate hydratase, mitochondrial OS=Mus musculus GN=Fh PE=1 SV=3
38	tr|Q3TVZ1|Q3TVZ1_MOUSE	90	59979	3 (3)	3 (3)	0.17	Catalase OS=Mus musculus GN=Cat PE=2 SV=1
39	sp|P15105|GLNA_MOUSE	88	42834	7 (7)	5 (5)	0.45	Glutamine synthetase OS=Mus musculus GN=Glul PE=1 SV=6
40	sp|Q8VCN5|CGL_MOUSE	83	44166	5 (5)	4 (4)	0.33	Cystathionine gamma-lyase OS=Mus musculus GN=Cth PE=1 SV=1
41	sp|Q9CR57|RL14_MOUSE	82	23663	1 (1)	1 (1)	0.14	60S ribosomal protein L14 OS=Mus musculus GN=Rpl14 PE=1 SV=3
42	sp|P52760|RIDA_MOUSE	82	14304	4 (4)	3 (3)	0.9	2-iminobutanoate/2-iminopropanoate deaminase OS=Mus musculus GN=Rida PE=1 SV=3
43	tr|A0A0R4J1N7|A0A0R4J1N7_MOUSE	82	210586	4 (4)	4 (4)	0.06	Ankyrin-1 OS=Mus musculus GN=Ank1 PE=1 SV=1
44	tr|A0A1Y7VJZ2|A0A1Y7VJZ2_MOUSE	78	24361	3 (2)	3 (2)	0.29	Glutathione transferase zeta 1 (Maleylacetoacetate isomerase), isoform CRA_c OS=Mus musculus GN=Gstz1 PE=4 SV=1
45	sp|P14152|MDHC_MOUSE	78	36659	2 (1)	2 (1)	0.09	Malate dehydrogenase, cytoplasmic OS=Mus musculus GN=Mdh1 PE=1 SV=3
46	tr|A0A0N4SV17|A0A0N4SV17_MOUSE	77	5243	3 (3)	3 (3)	3.91	Microsomal glutathione S-transferase 1 OS=Mus musculus GN=Mgst1 PE=1 SV=1
47	tr|Q3TII3|Q3TII3_MOUSE	76	50414	2 (2)	1 (1)	0.07	Elongation factor 1-alpha OS=Mus musculus GN=Eef1a1 PE=2 SV=1
48	sp|P32020|NLTP_MOUSE	75	59715	7 (6)	6 (5)	0.38	Non-specific lipid-transfer protein OS=Mus musculus GN=Scp2 PE=1 SV=3
49	tr|Q5M9L9|Q5M9L9_MOUSE	75	24533	3 (3)	2 (2)	0.29	40S ribosomal protein S8 OS=Mus musculus GN=Rps8 PE=2 SV=1
50	tr|A0A1L1SRX5|A0A1L1SRX5_MOUSE	74	4690	2 (2)	1 (1)	2.21	Peptidyl-prolyl cis-trans isomerase A OS=Mus musculus GN=Ppia PE=1 SV=1
51	sp|Q91X83|METK1_MOUSE	74	44051	2 (2)	1 (1)	0.07	S-adenosylmethionine synthase isoform type-1 OS=Mus musculus GN=Mat1a PE=1 SV=1
52	sp|Q8CHT0|AL4A1_MOUSE	73	62258	9 (5)	8 (4)	0.29	Delta-1-pyrroline-5-carboxylate dehydrogenase, mitochondrial OS=Mus musculus GN=Aldh4a1 PE=1 SV=3
53	tr|Q3TIQ2|Q3TIQ2_MOUSE	72	17935	2 (1)	2 (1)	0.19	Uncharacterized protein OS=Mus musculus GN=Rpl12 PE=2 SV=1
54	sp|P15508|SPTB1_MOUSE	72	245897	4 (3)	4 (3)	0.04	Spectrin beta chain, erythrocytic OS=Mus musculus GN=Sptb PE=1 SV=4
55	sp|Q78JT3|3HAO_MOUSE	71	32955	1 (1)	1 (1)	0.1	3-hydroxyanthranilate 3,4-dioxygenase OS=Mus musculus GN=Haao PE=1 SV=1
56	tr|Q546G4|Q546G4_MOUSE	69	70700	3 (3)	3 (3)	0.15	Albumin 1 OS=Mus musculus GN=Alb PE=1 SV=1
57	sp|Q61176|ARGI1_MOUSE	68	34957	5 (5)	5 (5)	0.57	Arginase-1 OS=Mus musculus GN=Arg1 PE=1 SV=1
58.1	tr|Q3TI47|Q3TI47_MOUSE	68	72415	3 (3)	3 (3)	0.14	Uncharacterized protein OS=Mus musculus GN=Hspa5 PE=2 SV=1
58.2	sp|P63017|HSP7C_MOUSE	60	71055	5 (5)	5 (5)	0.25	Heat shock cognate 71 kDa protein OS=Mus musculus GN=Hspa8 PE=1 SV=1
59	tr|A2A848|A2A848_MOUSE	68	70557	4 (3)	4 (3)	0.15	Peroxisomal acyl-coenzyme A oxidase 1 (Fragment) OS=Mus musculus GN=Acox1 PE=1 SV=1
60	tr|A0A140T8K8|A0A140T8K8_MOUSE	67	24050	2 (2)	2 (2)	0.3	60S ribosomal protein L13 OS=Mus musculus GN=Rpl13-ps3 PE=3 SV=1
61	tr|Q3UAD6|Q3UAD6_MOUSE	66	92703	3 (3)	3 (3)	0.11	Heat shock protein 90kDa beta (Grp94), member 1 OS=Mus musculus GN=Hsp90b1 PE=1 SV=1
62	tr|Q3TQD9|Q3TQD9_MOUSE	66	100662	2 (2)	2 (2)	0.07	Uncharacterized protein (Fragment) OS=Mus musculus GN=Sardh PE=2 SV=1
63	sp|P08032|SPTA1_MOUSE	66	280833	4 (3)	4 (3)	0.04	Spectrin alpha chain, erythrocytic 1 OS=Mus musculus GN=Spta1 PE=1 SV=3
64	tr|A2AE89|A2AE89_MOUSE	66	28709	6 (5)	5 (4)	0.55	Glutathione S-transferase Mu 1 OS=Mus musculus GN=Gstm1 PE=1 SV=2
65	sp|Q9DB77|QCR2_MOUSE	66	48262	2 (2)	2 (2)	0.14	Cytochrome b-c1 complex subunit 2, mitochondrial OS=Mus musculus GN=Uqcrc2 PE=1 SV=1
66	sp|O08601|MTP_MOUSE	64	99664	2 (1)	2 (1)	0.03	Microsomal triglyceride transfer protein large subunit OS=Mus musculus GN=Mttp PE=1 SV=2
67	sp|Q8VCT4|CES1D_MOUSE	62	62034	2 (1)	2 (1)	0.05	Carboxylesterase 1D OS=Mus musculus GN=Ces1d PE=1 SV=1
68	tr|Q3T9S7|Q3T9S7_MOUSE	62	130519	2 (1)	2 (1)	0.03	Pyruvate carboxylase OS=Mus musculus GN=Pcx PE=2 SV=1
69	sp|Q9CXW4|RL11_MOUSE	61	20468	2 (2)	2 (2)	0.36	60S ribosomal protein L11 OS=Mus musculus GN=Rpl11 PE=1 SV=4
70	tr|Q5FW97|Q5FW97_MOUSE	61	47453	3 (1)	3 (1)	0.07	Enolase 1, alpha non-neuron OS=Mus musculus GN=EG433182 PE=1 SV=1
71	sp|P40142|TKT_MOUSE	58	68272	3 (2)	3 (2)	0.1	Transketolase OS=Mus musculus GN=Tkt PE=1 SV=1
72	sp|Q922Q1|MARC2_MOUSE	55	38797	1 (1)	1 (1)	0.09	Mitochondrial amidoxime reducing component 2 OS=Mus musculus GN=Marc2 PE=1 SV=1
73	sp|Q8VC30|TKFC_MOUSE	55	59938	3 (2)	3 (2)	0.11	Triokinase/FMN cyclase OS=Mus musculus GN=Tkfc PE=1 SV=1
74	tr|A0A0U1RNK9|A0A0U1RNK9_MOUSE	55	19497	2 (2)	2 (2)	0.37	Electron transfer flavoprotein subunit beta (Fragment) OS=Mus musculus GN=Etfb PE=1 SV=2
75	tr|A0A097PUG1|A0A097PUG1_MOUSE	54	51928	26 (7)	1 (1)	0.13	Anti-lox-1 15C4 heavy chain OS=Mus musculus PE=2 SV=1
76	tr|Q3UEQ9|Q3UEQ9_MOUSE	54	103650	1 (1)	1 (1)	0.03	Aminoadipate-semialdehyde synthase OS=Mus musculus GN=Aass PE=1 SV=1
77	tr|A0A0G2JGJ1|A0A0G2JGJ1_MOUSE	53	22560	1 (1)	1 (1)	0.15	Dihydropteridine reductase OS=Mus musculus GN=Qdpr PE=1 SV=1
78	sp|P08249|MDHM_MOUSE	53	36045	2 (2)	2 (2)	0.19	Malate dehydrogenase, mitochondrial OS=Mus musculus GN=Mdh2 PE=1 SV=3
79	tr|Q5SVF7|Q5SVF7_MOUSE	53	33570	1 (1)	1 (1)	0.1	4-nitrophenylphosphatase domain and non-neuronal SNAP25-like protein homolog 1 (C. elegans), isoform CRA_f OS=Mus musculus GN=Nipsnap1 PE=1 SV=1
80	tr|D3YYM6|D3YYM6_MOUSE	52	20572	3 (3)	3 (3)	0.58	40S ribosomal protein S5 (Fragment) OS=Mus musculus GN=Rps5 PE=1 SV=1
81	sp|Q07417|ACADS_MOUSE	52	45146	1 (1)	1 (1)	0.07	Short-chain specific acyl-CoA dehydrogenase, mitochondrial OS=Mus musculus GN=Acads PE=1 SV=2
82	sp|Q9DBM2|ECHP_MOUSE	52	78822	4 (3)	3 (2)	0.13	Peroxisomal bifunctional enzyme OS=Mus musculus GN=Ehhadh PE=1 SV=4
83	sp|P62908|RS3_MOUSE	50	26828	2 (2)	2 (2)	0.26	40S ribosomal protein S3 OS=Mus musculus GN=Rps3 PE=1 SV=1
84	tr|Q3U8W4|Q3U8W4_MOUSE	51	24832	1 (1)	1 (1)	0.13	Superoxide dismutase OS=Mus musculus GN=Sod2 PE=2 SV=1
85	tr|A0PJ91|A0PJ91_MOUSE	51	66081	1 (1)	1 (1)	0.05	Hsp90aa1 protein (Fragment) OS=Mus musculus GN=Hsp90aa1 PE=2 SV=1
86	tr|Q3TVU9|Q3TVU9_MOUSE	51	34484	1 (1)	1 (1)	0.1	Uncharacterized protein OS=Mus musculus GN=Dhrs1 PE=2 SV=1
87	sp|C0HKE1|H2A1B_MOUSE	50	14127	3 (3)	2 (2)	0.91	Histone H2A type 1-B OS=Mus musculus GN=Hist1h2ab PE=1 SV=1
88	sp|Q8VCU1|EST3B_MOUSE	50	63712	1 (1)	1 (1)	0.05	Carboxylesterase 3B OS=Mus musculus GN=Ces3b PE=1 SV=2
89	tr|Q3TJL8|Q3TJL8_MOUSE	48	49039	2 (2)	2 (2)	0.14	Uncharacterized protein OS=Mus musculus GN=Pdia6 PE=2 SV=1
90	sp|Q8BH00|AL8A1_MOUSE	48	54371	6 (4)	3 (2)	0.19	Aldehyde dehydrogenase family 8 member A1 OS=Mus musculus GN=Aldh8a1 PE=1 SV=1
91	tr|Q3UUH0|Q3UUH0_MOUSE	47	51908	2 (1)	2 (1)	0.06	Uncharacterized protein OS=Mus musculus GN=Asl PE=2 SV=1
92	sp|Q9D8E6|RL4_MOUSE	47	47409	5 (4)	3 (2)	0.22	60S ribosomal protein L4 OS=Mus musculus GN=Rpl4 PE=1 SV=3
93	sp|P16015|CAH3_MOUSE	47	29633	3 (2)	2 (1)	0.11	Carbonic anhydrase 3 OS=Mus musculus GN=Ca3 PE=1 SV=3
94	tr|A0A1L1SRW0|A0A1L1SRW0_MOUSE	47	10233	1 (1)	1 (1)	0.34	40S ribosomal protein SA (Fragment) OS=Mus musculus GN=Rpsa PE=1 SV=1
95	tr|Q3UPJ3|Q3UPJ3_MOUSE	46	115368	1 (1)	1 (1)	0.03	Uncharacterized protein (Fragment) OS=Mus musculus GN=Cltc PE=2 SV=1
96	tr|B1AQR8|B1AQR8_MOUSE	46	40281	1 (1)	1 (1)	0.08	Galectin OS=Mus musculus GN=Lgals9 PE=1 SV=1
97	tr|Q3TJ71|Q3TJ71_MOUSE	46	55555	2 (2)	2 (2)	0.12	UDP-glucose 6-dehydrogenase OS=Mus musculus GN=Ugdh PE=2 SV=1
98	tr|Q3U548|Q3U548_MOUSE	45	55852	2 (2)	2 (2)	0.12	Uncharacterized protein OS=Mus musculus GN=Ugp2 PE=2 SV=1
99	tr|Q3UNF3|Q3UNF3_MOUSE	45	77453	2 (2)	2 (2)	0.09	Acyl-coenzyme A oxidase OS=Mus musculus GN=Acox2 PE=2 SV=1
100	tr|Q3V235|Q3V235_MOUSE	45	33276	1 (1)	1 (1)	0.1	Prohibitin 2 OS=Mus musculus GN=Phb2 PE=1 SV=1
101	tr|Q3U5P8|Q3U5P8_MOUSE	45	30036	1 (1)	1 (1)	0.11	40S ribosomal protein S3a OS=Mus musculus GN=Rps3a1 PE=2 SV=1
102	sp|O88587|COMT_MOUSE	45	29695	1 (1)	1 (1)	0.11	Catechol O-methyltransferase OS=Mus musculus GN=Comt PE=1 SV=2
103	tr|Q61782|Q61782_MOUSE	45	10712	1 (1)	1 (1)	0.32	Type I epidermal keratin mRNA, 3'end (Fragment) OS=Mus musculus PE=2 SV=1
104	sp|Q8BMS1|ECHA_MOUSE	44	83302	3 (2)	3 (2)	0.08	Trifunctional enzyme subunit alpha, mitochondrial OS=Mus musculus GN=Hadha PE=1 SV=1
105	tr|Q5DTU1|Q5DTU1_MOUSE	44	96963	2 (2)	1 (1)	0.03	MKIAA1890 protein (Fragment) OS=Mus musculus GN=Csmd1 PE=2 SV=1
106	tr|A0A0G2JES3|A0A0G2JES3_MOUSE	43	21834	1 (1)	1 (1)	0.15	60S ribosomal protein L9 (Fragment) OS=Mus musculus GN=Rpl9 PE=1 SV=1
107	tr|D3Z041|D3Z041_MOUSE	43	79011	1 (1)	1 (1)	0.04	Long-chain-fatty-acid--CoA ligase 1 OS=Mus musculus GN=Acsl1 PE=1 SV=1
108	tr|Q6PF96|Q6PF96_MOUSE	43	61749	1 (1)	1 (1)	0.05	Electron transfer flavoprotein-ubiquinone oxidoreductase, mitochondrial OS=Mus musculus GN=Etfdh PE=1 SV=1
109	tr|F6Q404|F6Q404_MOUSE	43	13808	2 (2)	2 (2)	0.56	Protein disulfide-isomerase A3 (Fragment) OS=Mus musculus GN=Pdia3 PE=1 SV=1
110	tr|A0A1B0GSR9|A0A1B0GSR9_MOUSE	43	34919	5 (4)	3 (3)	0.31	L-lactate dehydrogenase OS=Mus musculus GN=Ldha PE=1 SV=1
111	tr|Q0VDM9|Q0VDM9_MOUSE	42	55415	1 (1)	1 (1)	0.06	Krt78 protein (Fragment) OS=Mus musculus GN=Krt78 PE=2 SV=1
112	tr|Q3TXB1|Q3TXB1_MOUSE	42	26187	1 (1)	1 (1)	0.13	Uncharacterized protein OS=Mus musculus GN=C1qa PE=2 SV=1
113	tr|D3YVF4|D3YVF4_MOUSE	41	12874	1 (1)	1 (1)	0.27	40S ribosomal protein S14 (Fragment) OS=Mus musculus GN=Rps14 PE=1 SV=1
114	sp|P62830|RL23_MOUSE	41	14970	1 (1)	1 (1)	0.23	60S ribosomal protein L23 OS=Mus musculus GN=Rpl23 PE=1 SV=1
115	tr|A0A0R4J083|A0A0R4J083_MOUSE	41	48266	1 (1)	1 (1)	0.07	Long-chain-specific acyl-CoA dehydrogenase, mitochondrial OS=Mus musculus GN=Acadl PE=1 SV=1
116	tr|A0A1B0GQU8|A0A1B0GQU8_MOUSE	41	18147	3 (3)	3 (3)	0.67	60S ribosomal protein L18 OS=Mus musculus GN=Rpl18 PE=1 SV=1
117	tr|Q3U7D2|Q3U7D2_MOUSE	40	24245	1 (1)	1 (1)	0.14	Ribosomal protein L15 OS=Mus musculus GN=Rpl15 PE=2 SV=1
118	tr|B2RTM0|B2RTM0_MOUSE	40	11360	4 (3)	2 (1)	0.7	Histone H4 OS=Mus musculus GN=Hist2h4 PE=1 SV=1
119	tr|D3YYV8|D3YYV8_MOUSE	40	18214	1 (1)	1 (1)	0.19	60S ribosomal protein L5 (Fragment) OS=Mus musculus GN=Rpl5 PE=1 SV=1
120	tr|B7ZP10|B7ZP10_MOUSE	40	52183	2 (2)	2 (2)	0.13	Cyp2d12 protein OS=Mus musculus GN=Cyp2d12 PE=2 SV=1
121	tr|Q3T9U9|Q3T9U9_MOUSE	39	46378	1 (1)	1 (1)	0.07	Uncharacterized protein OS=Mus musculus GN=Rpl3 PE=2 SV=1
122	sp|P24549|AL1A1_MOUSE	39	55060	1 (1)	1 (1)	0.06	Retinal dehydrogenase 1 OS=Mus musculus GN=Aldh1a1 PE=1 SV=5
123	tr|Q3TT11|Q3TT11_MOUSE	39	79954	3 (3)	3 (3)	0.13	Uncharacterized protein OS=Mus musculus GN=Hsd17b4 PE=2 SV=1
124	tr|A0A1W2P781|A0A1W2P781_MOUSE	39	8771	1 (1)	1 (1)	0.4	Phenylalanine-4-hydroxylase OS=Mus musculus GN=Pah PE=1 SV=1
125	sp|Q9EQF5|DPYS_MOUSE	38	57202	2 (1)	1 (1)	0.06	Dihydropyrimidinase OS=Mus musculus GN=Dpys PE=1 SV=2
126	tr|Q8K0L1|Q8K0L1_MOUSE	38	50018	1 (1)	1 (1)	0.07	Aldh6a1 protein OS=Mus musculus GN=Aldh6a1 PE=2 SV=1
127	tr|A0A087WP24|A0A087WP24_MOUSE	38	14996	1 (1)	1 (1)	0.23	Protein ABHD14B (Fragment) OS=Mus musculus GN=Abhd14b PE=1 SV=1
128	tr|Q3UJW9|Q3UJW9_MOUSE	38	36820	3 (2)	3 (2)	0.19	Uncharacterized protein OS=Mus musculus GN=Akr1a1 PE=2 SV=1
129	tr|Q5M8M8|Q5M8M8_MOUSE	37	17633	1 (1)	1 (1)	0.19	60S ribosomal protein L29 OS=Mus musculus GN=Rpl29 PE=1 SV=1
130	tr|B1AR28|B1AR28_MOUSE	37	68907	1 (1)	1 (1)	0.05	Very long-chain-specific acyl-CoA dehydrogenase, mitochondrial OS=Mus musculus GN=Acadvl PE=1 SV=1
131	tr|Q9DCU1|Q9DCU1_MOUSE	37	25402	3 (2)	3 (2)	0.28	Glutathione S-transferase OS=Mus musculus GN=Gsta3 PE=2 SV=1
132	tr|Q8N7N8|Q8N7N8_MOUSE	36	57334	2 (2)	2 (2)	0.12	Hydroxymethylglutaryl-CoA synthase OS=Mus musculus GN=Hmgcs2 PE=2 SV=1
133	tr|Q3UMP2|Q3UMP2_MOUSE	36	34728	1 (1)	1 (1)	0.1	Uncharacterized protein OS=Mus musculus GN=Hmgcl PE=2 SV=1
134	tr|Q3U6I5|Q3U6I5_MOUSE	35	26963	1 (1)	1 (1)	0.12	Uncharacterized protein OS=Mus musculus GN=C1qb PE=2 SV=1
135	sp|P26443|DHE3_MOUSE	35	61640	2 (2)	2 (2)	0.11	Glutamate dehydrogenase 1, mitochondrial OS=Mus musculus GN=Glud1 PE=1 SV=1
136	sp|Q64442|DHSO_MOUSE	35	38795	5 (1)	4 (1)	0.09	Sorbitol dehydrogenase OS=Mus musculus GN=Sord PE=1 SV=3
137	tr|A0A0A6YXQ7|A0A0A6YXQ7_MOUSE	35	8704	1 (1)	1 (1)	0.4	Peroxiredoxin-6 OS=Mus musculus GN=Prdx6 PE=1 SV=1
138	sp|P05201|AATC_MOUSE	35	46504	3 (2)	3 (2)	0.15	Aspartate aminotransferase, cytoplasmic OS=Mus musculus GN=Got1 PE=1 SV=3
139	tr|A0A0A6YWX6|A0A0A6YWX6_MOUSE	35	17737	1 (1)	1 (1)	0.19	Cytochrome b-c1 complex subunit 1, mitochondrial (Fragment) OS=Mus musculus GN=Uqcrc1 PE=1 SV=1
140	tr|Q3TIZ0|Q3TIZ0_MOUSE	35	50592	2 (1)	2 (1)	0.07	Tubulin alpha chain OS=Mus musculus GN=Tuba1c PE=2 SV=1
141	tr|Q4VAG4|Q4VAG4_MOUSE	34	14807	1 (1)	1 (1)	0.23	MCG12304 OS=Mus musculus GN=Rpl22 PE=1 SV=1
142	tr|Q3UKA4|Q3UKA4_MOUSE	34	40601	1 (1)	1 (1)	0.08	Alcohol dehydrogenase 1 (Class I), isoform CRA_c OS=Mus musculus GN=Adh1 PE=1 SV=1
143	tr|D3YV17|D3YV17_MOUSE	34	188597	1 (1)	1 (1)	0.02	Trinucleotide repeat-containing gene 18 protein OS=Mus musculus GN=Tnrc18 PE=1 SV=2
144	tr|I7HPX6|I7HPX6_MOUSE	34	4482	1 (1)	1 (1)	0.84	Cytochrome b-c1 complex subunit 8 OS=Mus musculus GN=Uqcrq PE=1 SV=1
145	sp|P56135|ATPK_MOUSE	34	10394	1 (1)	1 (1)	0.33	ATP synthase subunit f, mitochondrial OS=Mus musculus GN=Atp5j2 PE=1 SV=3
146	tr|A2A9Q2|A2A9Q2_MOUSE	34	141444	1 (1)	1 (1)	0.02	Nardilysin, N-arginine dibasic convertase, NRD convertase 1 OS=Mus musculus GN=Nrd1 PE=1 SV=1
147	tr|Q9DBN7|Q9DBN7_MOUSE	34	32488	2 (1)	2 (1)	0.1	Uncharacterized protein OS=Mus musculus GN=Eci1 PE=2 SV=1
148	tr|A0JNS9|A0JNS9_MOUSE	33	14227	3 (2)	3 (2)	0.54	Histone H2B OS=Mus musculus GN=Hist1h2ba PE=2 SV=1
149	sp|Q8K2B3|SDHA_MOUSE	33	73623	2 (1)	2 (1)	0.04	Succinate dehydrogenase [ubiquinone] flavoprotein subunit, mitochondrial OS=Mus musculus GN=Sdha PE=1 SV=1
150	tr|Q3TA19|Q3TA19_MOUSE	33	58918	1 (1)	1 (1)	0.06	Anion exchange protein OS=Mus musculus GN=Slc4a1 PE=2 SV=1
151	sp|P62274|RS29_MOUSE	33	6900	1 (1)	1 (1)	0.52	40S ribosomal protein S29 OS=Mus musculus GN=Rps29 PE=3 SV=2
152	tr|B2MWM9|B2MWM9_MOUSE	32	48136	1 (1)	1 (1)	0.07	Calreticulin OS=Mus musculus GN=Calr PE=1 SV=1
153	sp|P38647|GRP75_MOUSE	32	73701	2 (1)	2 (1)	0.04	Stress-70 protein, mitochondrial OS=Mus musculus GN=Hspa9 PE=1 SV=3
154	tr|B2RY90|B2RY90_MOUSE	32	22715	1 (1)	1 (1)	0.15	Isoc2a protein OS=Mus musculus GN=Isoc2a PE=2 SV=1
155	tr|B2RTH8|B2RTH8_MOUSE	32	33765	1 (1)	1 (1)	0.1	DTW domain containing 2 OS=Mus musculus GN=Dtwd2 PE=2 SV=1
156	tr|B1AU25|B1AU25_MOUSE	32	66358	1 (1)	1 (1)	0.05	Apoptosis-inducing factor 1, mitochondrial OS=Mus musculus GN=Aifm1 PE=1 SV=1
157	tr|Q6P5I3|Q6P5I3_MOUSE	32	40320	1 (1)	1 (1)	0.08	S-(hydroxymethyl)glutathione dehydrogenase OS=Mus musculus GN=Adh5 PE=1 SV=2
158	sp|Q8BH95|ECHM_MOUSE	31	31853	1 (1)	1 (1)	0.1	Enoyl-CoA hydratase, mitochondrial OS=Mus musculus GN=Echs1 PE=1 SV=1
159	sp|Q99KI0|ACON_MOUSE	31	86151	2 (1)	2 (1)	0.04	Aconitate hydratase, mitochondrial OS=Mus musculus GN=Aco2 PE=1 SV=1
160	sp|Q91VT4|CBR4_MOUSE	31	25570	1 (1)	1 (1)	0.13	Carbonyl reductase family member 4 OS=Mus musculus GN=Cbr4 PE=1 SV=2
161	tr|Q3U6C5|Q3U6C5_MOUSE	30	33462	1 (1)	1 (1)	0.1	Uncharacterized protein OS=Mus musculus GN=Kcnab1 PE=2 SV=1
162	tr|E9PVG8|E9PVG8_MOUSE	30	292361	1 (1)	1 (1)	0.01	RIKEN cDNA 9530053A07 gene OS=Mus musculus GN=9530053A07Rik PE=1 SV=1
163	tr|A0A1Y7VMC8|A0A1Y7VMC8_MOUSE	30	31855	1 (1)	1 (1)	0.1	Aldo-keto reductase family 1, member C20 (Fragment) OS=Mus musculus GN=Akr1c20 PE=4 SV=1
164	sp|Q6ZWN5|RS9_MOUSE	30	22635	2 (1)	2 (1)	0.15	40S ribosomal protein S9 OS=Mus musculus GN=Rps9 PE=1 SV=3
165	tr|Q8C140|Q8C140_MOUSE	30	74691	1 (1)	1 (1)	0.04	Uncharacterized protein OS=Mus musculus GN=Slc25a13 PE=2 SV=1
166	sp|Q9WUM5|SUCA_MOUSE	30	36474	1 (1)	1 (1)	0.09	Succinate--CoA ligase [ADP/GDP-forming] subunit alpha, mitochondrial OS=Mus musculus GN=Suclg1 PE=1 SV=4
167	tr|A0A0G2JEY6|A0A0G2JEY6_MOUSE	30	10437	2 (2)	2 (2)	0.77	60S ribosomal protein L34 OS=Mus musculus GN=Rpl34 PE=1 SV=1
168	tr|A0A1B0GSV7|A0A1B0GSV7_MOUSE	30	50109	1 (1)	1 (1)	0.07	Cytochrome P450 2E1 OS=Mus musculus GN=Cyp2e1 PE=1 SV=1
169	tr|Q3TII0|Q3TII0_MOUSE	29	58561	1 (1)	1 (1)	0.06	T-complex protein 1 subunit delta OS=Mus musculus GN=Cct4 PE=2 SV=1
170	tr|Q3TJZ1|Q3TJZ1_MOUSE	29	96164	1 (1)	1 (1)	0.03	Uncharacterized protein OS=Mus musculus GN=Eef2 PE=2 SV=1
171	tr|A0A0G2JFF2|A0A0G2JFF2_MOUSE	29	66987	1 (1)	1 (1)	0.05	Fibrosin-like 1 OS=Mus musculus GN=Fbrsl1 PE=1 SV=1
172	sp|P49429|HPPD_MOUSE	29	45254	2 (2)	2 (2)	0.15	4-hydroxyphenylpyruvate dioxygenase OS=Mus musculus GN=Hpd PE=1 SV=3
173	tr|B1AR34|B1AR34_MOUSE	29	29891	1 (1)	1 (1)	0.11	Asialoglycoprotein receptor 1 OS=Mus musculus GN=Asgr1 PE=1 SV=1
174	tr|Q8R084|Q8R084_MOUSE	28	60802	1 (1)	1 (1)	0.05	UDP-glucuronosyltransferase OS=Mus musculus GN=Ugt2b1 PE=1 SV=1
175	tr|Q3TK73|Q3TK73_MOUSE	28	31427	2 (1)	2 (1)	0.11	Uncharacterized protein OS=Mus musculus GN=Rpl7 PE=2 SV=1
176	tr|A0A0G2JGQ0|A0A0G2JGQ0_MOUSE	28	15344	1 (1)	1 (1)	0.22	Annexin A5 (Fragment) OS=Mus musculus GN=Anxa5 PE=1 SV=1
177	sp|Q3TZ89|SC31B_MOUSE	28	127207	1 (1)	1 (1)	0.03	Protein transport protein Sec31B OS=Mus musculus GN=Sec31b PE=1 SV=2
178	sp|Q02105|C1QC_MOUSE	28	26374	1 (1)	1 (1)	0.13	Complement C1q subcomponent subunit C OS=Mus musculus GN=C1qc PE=1 SV=2
179	tr|Q3THU8|Q3THU8_MOUSE	27	40044	1 (1)	1 (1)	0.08	Uncharacterized protein OS=Mus musculus GN=Slc25a3 PE=2 SV=1
180	tr|Q4FZK2|Q4FZK2_MOUSE	27	50371	1 (1)	1 (1)	0.07	Eukaryotic translation elongation factor 1 gamma OS=Mus musculus GN=Eef1g PE=1 SV=1
181	sp|A2ASS6|TITIN_MOUSE	27	3933362	1 (1)	1 (1)		Titin OS=Mus musculus GN=Ttn PE=1 SV=1
182	tr|B2RWR8|B2RWR8_MOUSE	27	147181	1 (1)	1 (1)	0.02	Myosin VI OS=Mus musculus GN=Myo6 PE=2 SV=1
183	tr|A2AQT7|A2AQT7_MOUSE	27	24804	1 (1)	1 (1)	0.14	Methylmalonic aciduria and homocystinuria type D homolog, mitochondrial (Fragment) OS=Mus musculus GN=Mmadhc PE=1 SV=1
184	tr|Q8BGL3|Q8BGL3_MOUSE	27	33502	1 (1)	1 (1)	0.1	Sulfotransferase OS=Mus musculus GN=Sult2a8 PE=1 SV=1
185	tr|Q3UXQ6|Q3UXQ6_MOUSE	26	29773	1 (1)	1 (1)	0.11	40S ribosomal protein S4 OS=Mus musculus GN=Rps4x PE=2 SV=1
186	sp|P34914|HYES_MOUSE	25	63045	3 (2)	3 (2)	0.11	Bifunctional epoxide hydrolase 2 OS=Mus musculus GN=Ephx2 PE=1 SV=2
187	sp|Q3UV17|K22O_MOUSE	26	63319	2 (2)	1 (1)	0.05	Keratin, type II cytoskeletal 2 oral OS=Mus musculus GN=Krt76 PE=1 SV=1
188	tr|A0A1B0GRR3|A0A1B0GRR3_MOUSE	26	15302	2 (2)	2 (2)	0.49	40S ribosomal protein S11 OS=Mus musculus GN=Rps11 PE=1 SV=1
189	tr|Q3V0K6|Q3V0K6_MOUSE	26	28720	1 (1)	1 (1)	0.12	Kynurenine 3-monooxygenase OS=Mus musculus GN=Kmo PE=1 SV=1
190	tr|Q4V9X9|Q4V9X9_MOUSE	26	17553	1 (1)	1 (1)	0.19	Rpl23a protein (Fragment) OS=Mus musculus GN=Rpl23a PE=2 SV=1
191	tr|E9PZ97|E9PZ97_MOUSE	26	160548	1 (1)	1 (1)	0.02	Bloom syndrome protein homolog OS=Mus musculus GN=Blm PE=1 SV=1
192	sp|Q99JY0|ECHB_MOUSE	26	51639	3 (1)	3 (1)	0.06	Trifunctional enzyme subunit beta, mitochondrial OS=Mus musculus GN=Hadhb PE=1 SV=1
193	sp|Q3UEG6|AGT2_MOUSE	25	57876	1 (1)	1 (1)	0.06	Alanine--glyoxylate aminotransferase 2, mitochondrial OS=Mus musculus GN=Agxt2 PE=1 SV=1
194	sp|Q9D2G2|ODO2_MOUSE	25	49306	1 (1)	1 (1)	0.07	Dihydrolipoyllysine-residue succinyltransferase component of 2-oxoglutarate dehydrogenase complex, mitochondrial OS=Mus musculus GN=Dlst PE=1 SV=1
195	tr|Q3TET0|Q3TET0_MOUSE	25	60159	1 (1)	1 (1)	0.05	Uncharacterized protein OS=Mus musculus GN=Cct7 PE=2 SV=1
196	sp|A2AJ77|PRD12_MOUSE	25	40734	1 (1)	1 (1)	0.08	PR domain zinc finger protein 12 OS=Mus musculus GN=Prdm12 PE=2 SV=1
197	tr|A0A0G2JGX4|A0A0G2JGX4_MOUSE	25	114341	1 (1)	1 (1)	0.03	Sodium/potassium-transporting ATPase subunit alpha OS=Mus musculus GN=Atp1a3 PE=1 SV=1
198	tr|A0A140T8L5|A0A140T8L5_MOUSE	25	24470	3 (2)	3 (2)	0.29	Ribosomal protein S2, pseudogene 6 OS=Mus musculus GN=Rps2-ps6 PE=3 SV=1
199	tr|A0A0R4IZY2|A0A0R4IZY2_MOUSE	24	57198	1 (1)	1 (1)	0.06	Cytochrome P450 2D26 OS=Mus musculus GN=Cyp2d26 PE=1 SV=1
200	tr|F7DB73|F7DB73_MOUSE	24	6560	1 (1)	1 (1)	0.55	ATP-dependent DNA helicase Q1 (Fragment) OS=Mus musculus GN=Recql PE=4 SV=1
201	tr|A0A1B0GS77|A0A1B0GS77_MOUSE	24	70277	2 (1)	1 (1)	0.05	Aryl hydrocarbon receptor nuclear translocator-like protein 1 OS=Mus musculus GN=Arntl PE=1 SV=1
202	tr|A2ALK6|A2ALK6_MOUSE	24	100519	1 (1)	1 (1)	0.03	Band 4.1-like protein 4B OS=Mus musculus GN=Epb41l4b PE=1 SV=1
203	tr|B2RXQ5|B2RXQ5_MOUSE	24	187298	1 (1)	1 (1)	0.02	Phosphatidylinositol-3,4, 5-trisphosphate-dependent Rac exchange factor 1 OS=Mus musculus GN=Prex1 PE=2 SV=1
204	sp|Q8BN58|RHG28_MOUSE	24	82143	1 (1)	1 (1)	0.04	Rho GTPase-activating protein 28 OS=Mus musculus GN=Arhgap28 PE=1 SV=1
205	tr|A0A0B4J1K5|A0A0B4J1K5_MOUSE	24	13579	1 (1)	1 (1)	0.25	Immunoglobulin lambda variable 3 (Fragment) OS=Mus musculus GN=Iglv3 PE=4 SV=1
206	tr|Q8CI38|Q8CI38_MOUSE	24	50699	1 (1)	1 (1)	0.06	Homogentisate 1, 2-dioxygenase OS=Mus musculus GN=Hgd PE=2 SV=2
207	tr|G3UWC8|G3UWC8_MOUSE	23	325275	2 (1)	1 (1)	0.01	Otogelin OS=Mus musculus GN=Otog PE=4 SV=1
208	tr|M0QWX7|M0QWX7_MOUSE	23	10839	1 (1)	1 (1)	0.32	Cytochrome c oxidase subunit 4 isoform 1, mitochondrial (Fragment) OS=Mus musculus GN=Cox4i1 PE=1 SV=1
209	sp|Q8CI08|SLAI2_MOUSE	23	62568	1 (1)	1 (1)	0.05	SLAIN motif-containing protein 2 OS=Mus musculus GN=Slain2 PE=1 SV=2
210	tr|Q6ZQM2|Q6ZQM2_MOUSE	23	15427	1 (1)	1 (1)	0.22	Peptidyl-prolyl cis-trans isomerase OS=Mus musculus GN=Ppib PE=2 SV=1
211	sp|Q8C7H1|MMAA_MOUSE	23	46359	1 (1)	1 (1)	0.07	Methylmalonic aciduria type A homolog, mitochondrial OS=Mus musculus GN=Mmaa PE=1 SV=1
212	tr|Q3TF72|Q3TF72_MOUSE	23	57452	1 (1)	1 (1)	0.06	Protein disulfide-isomerase OS=Mus musculus GN=P4hb PE=2 SV=1
213	tr|Q0VF70|Q0VF70_MOUSE	23	77302	1 (1)	1 (1)	0.04	Nphp1 protein OS=Mus musculus GN=Nphp1 PE=2 SV=1
214	tr|A0A1S6GWH5|A0A1S6GWH5_MOUSE	23	125412	1 (1)	1 (1)	0.03	Uncharacterized protein OS=Mus musculus GN=Uba1 PE=2 SV=1
215	tr|Q3TR62|Q3TR62_MOUSE	23	58057	1 (1)	1 (1)	0.06	DNA topoisomerase 2 (Fragment) OS=Mus musculus GN=Top2b PE=2 SV=1
216	tr|A0A0A0MQ68|A0A0A0MQ68_MOUSE	22	50052	1 (1)	1 (1)	0.07	Glutaryl-CoA dehydrogenase, mitochondrial OS=Mus musculus GN=Gcdh PE=1 SV=1
217	sp|O88451|RDH7_MOUSE	22	36093	3 (2)	3 (2)	0.19	Retinol dehydrogenase 7 OS=Mus musculus GN=Rdh7 PE=1 SV=1
218	tr|Q3TF25|Q3TF25_MOUSE	22	23407	1 (1)	1 (1)	0.14	Uncharacterized protein OS=Mus musculus GN=Atp5o PE=2 SV=1
219	tr|B1AXW5|B1AXW5_MOUSE	22	19029	2 (1)	2 (1)	0.18	Peroxiredoxin-1 (Fragment) OS=Mus musculus GN=Prdx1 PE=1 SV=8
220	sp|Q9QYI5|DNJB2_MOUSE	22	35629	1 (1)	1 (1)	0.09	DnaJ homolog subfamily B member 2 OS=Mus musculus GN=Dnajb2 PE=1 SV=3
221	tr|Q3V2I9|Q3V2I9_MOUSE	22	26034	1 (1)	1 (1)	0.13	Uncharacterized protein (Fragment) OS=Mus musculus GN=Acadm PE=2 SV=1
222	tr|Q4FZE6|Q4FZE6_MOUSE	21	22113	2 (1)	2 (1)	0.15	Ribosomal protein S7 OS=Mus musculus GN=Rps7 PE=2 SV=1
223	sp|Q9DBF1|AL7A1_MOUSE	21	59337	3 (1)	3 (1)	0.06	Alpha-aminoadipic semialdehyde dehydrogenase OS=Mus musculus GN=Aldh7a1 PE=1 SV=4
224	tr|A0A0R4J259|A0A0R4J259_MOUSE	21	62733	2 (1)	2 (1)	0.05	Heterogeneous nuclear ribonucleoprotein Q OS=Mus musculus GN=Syncrip PE=1 SV=1
225	sp|P29788|VTNC_MOUSE	21	55613	1 (1)	1 (1)	0.06	Vitronectin OS=Mus musculus GN=Vtn PE=1 SV=2
226	tr|Q8BP16|Q8BP16_MOUSE	20	38290	1 (1)	1 (1)	0.09	Core histone macro-H2A OS=Mus musculus GN=H2afy2 PE=2 SV=1
227	sp|Q9QY23|PKP3_MOUSE	20	87792	1 (1)	1 (1)	0.04	Plakophilin-3 OS=Mus musculus GN=Pkp3 PE=1 SV=2
228	tr|A0A0G2JDJ5|A0A0G2JDJ5_MOUSE	20	13980	1 (1)	1 (1)	0.24	Farnesyl pyrophosphate synthase (Fragment) OS=Mus musculus GN=Fdps PE=4 SV=1
229	tr|Q3TG52|Q3TG52_MOUSE	20	56807	1 (1)	1 (1)	0.06	Uncharacterized protein OS=Mus musculus GN=Aldh9a1 PE=2 SV=1
230	tr|A0A0G2JDI9|A0A0G2JDI9_MOUSE	20	63171	1 (1)	1 (1)	0.05	ATP-binding cassette sub-family D member 3 OS=Mus musculus GN=Abcd3 PE=1 SV=1
231	sp|Q9CPY7|AMPL_MOUSE	20	56505	1 (1)	1 (1)	0.06	Cytosol aminopeptidase OS=Mus musculus GN=Lap3 PE=1 SV=3
232	tr|A0A0N4SUN2|A0A0N4SUN2_MOUSE	20	73825	1 (1)	1 (1)	0.04	Solute carrier organic anion transporter family member OS=Mus musculus GN=Slco1b2 PE=1 SV=1
233	tr|Q3UEL5|Q3UEL5_MOUSE	20	79173	1 (1)	1 (1)	0.04	Urocanate hydratase OS=Mus musculus GN=Uroc1 PE=1 SV=1

## Sheet: anti-His antibody
		Score	Mass	Matches	Sequences	emPAI
1.1	sp|Q8C196|CPSM_MOUSE	26134	165711	1380 (1236)	111 (103)	25.51	Carbamoyl-phosphate synthase [ammonia], mitochondrial OS=Mus musculus GN=Cps1 PE=1 SV=2
1.2	sp|B2RQC6|PYR1_MOUSE	96	245650	10 (8)	3 (3)	0.04	CAD protein OS=Mus musculus GN=Cad PE=1 SV=1
2	sp|O35490|BHMT1_MOUSE	3803	45448	191 (167)	24 (19)	7.21	Betaine--homocysteine S-methyltransferase 1 OS=Mus musculus GN=Bhmt PE=1 SV=1
3	sp|Q61362|CH3L1_MOUSE	3419	44150	211 (187)	25 (25)	9.79	Chitinase-3-like protein 1 OS=Mus musculus GN=Chi3l1 PE=1 SV=3
4	sp|Q8BWT1|THIM_MOUSE	2532	42260	111 (107)	26 (26)	26.4	3-ketoacyl-CoA thiolase, mitochondrial OS=Mus musculus GN=Acaa2 PE=1 SV=3
5.1	tr|A0A0A6YXN4|A0A0A6YXN4_MOUSE	2479	13018	147 (122)	6 (6)	9.37	Immunoglobulin heavy variable V1-18 (Fragment) OS=Mus musculus GN=Ighv1-18 PE=1 SV=1
5.2	tr|A0A075B5P3|A0A075B5P3_MOUSE	2143	37284	134 (109)	18 (16)	8.13	Immunoglobulin heavy constant gamma 2B (Fragment) OS=Mus musculus GN=Ighg2b PE=1 SV=1
5.3	sp|P01867|IGG2B_MOUSE	2118	44972	134 (110)	18 (16)	6.27	Ig gamma-2B chain C region OS=Mus musculus GN=Igh-3 PE=1 SV=3
5.4	tr|A0A075B5V1|A0A075B5V1_MOUSE	809	11073	67 (49)	6 (6)	5.65	Immunoglobulin heavy variable 1-31 OS=Mus musculus GN=Ighv1-31 PE=4 SV=1
5.5	tr|X5J5C8|X5J5C8_MOUSE	746	11495	58 (45)	3 (3)	1.84	IgM heavy chain VDJ region (Fragment) OS=Mus musculus PE=2 SV=1
5.6	tr|A0A075B5U7|A0A075B5U7_MOUSE	745	13127	59 (46)	3 (3)	2.19	Immunoglobulin heavy variable 1-22 (Fragment) OS=Mus musculus GN=Ighv1-22 PE=4 SV=1
5.7	tr|A0A0A6YVW3|A0A0A6YVW3_MOUSE	686	13152	57 (44)	2 (2)	1.01	Immunoglobulin heavy variable V1-23 (Fragment) OS=Mus musculus GN=Ighv1-23 PE=4 SV=1
5.8	tr|Q58E56|Q58E56_MOUSE	503	52873	32 (26)	13 (12)	1.97	Igh protein OS=Mus musculus GN=Igh PE=2 SV=1
5.9	sp|P01863|GCAA_MOUSE	368	36936	21 (19)	9 (8)	1.8	Ig gamma-2A chain C region, A allele OS=Mus musculus GN=Ighg PE=1 SV=1
5.1	tr|I6L985|I6L985_MOUSE	157	52684	9 (9)	8 (8)	0.62	Igh protein OS=Mus musculus GN=Igh PE=1 SV=1
5.11	tr|Q9DCD9|Q9DCD9_MOUSE	150	46703	13 (10)	7 (7)	0.85	Uncharacterized protein OS=Mus musculus PE=2 SV=1
5.12	sp|P01801|HVM32_MOUSE	121	12916	4 (4)	4 (4)	1.57	Ig heavy chain V-III region J606 OS=Mus musculus PE=1 SV=1
5.13	tr|Q5U472|Q5U472_MOUSE	108	53021	4 (4)	3 (3)	0.27	Igh protein OS=Mus musculus GN=Igh PE=2 SV=1
5.14	tr|Q4V9Z4|Q4V9Z4_MOUSE	108	52404	4 (4)	3 (3)	0.28	Igh protein OS=Mus musculus GN=Igh PE=2 SV=1
5.15	tr|A0A075B5T3|A0A075B5T3_MOUSE	100	13456	4 (4)	4 (4)	1.48	Immunoglobulin heavy variable 6-6 (Fragment) OS=Mus musculus GN=Ighv6-6 PE=4 SV=1
5.16	tr|Q32NZ5|Q32NZ5_MOUSE	87	52998	4 (4)	3 (3)	0.27	Igh protein OS=Mus musculus GN=Igh PE=2 SV=1
5.17	tr|Q99LA6|Q99LA6_MOUSE	76	53389	3 (3)	3 (3)	0.2	Igh protein OS=Mus musculus GN=Igh PE=2 SV=1
5.18	tr|A0A075B5R4|A0A075B5R4_MOUSE	55	13154	2 (2)	2 (2)	0.58	Immunoglobulin heavy variable 14-1 (Fragment) OS=Mus musculus GN=Ighv14-1 PE=4 SV=1
5.19	tr|A0A1E1GJG6|A0A1E1GJG6_MOUSE	55	25976	6 (3)	2 (2)	0.27	Single-chain variable OS=Mus musculus GN=Wgn-scFv PE=2 SV=1
5.2	tr|X5J5D2|X5J5D2_MOUSE	40	12254	7 (4)	3 (3)	1.1	IgM heavy chain VDJ region (Fragment) OS=Mus musculus PE=2 SV=1
5.21	tr|A0A075B5Y2|A0A075B5Y2_MOUSE	36	13119	7 (4)	3 (3)	1.01	Immunoglobulin heavy variable 1-75 (Fragment) OS=Mus musculus GN=Ighv1-75 PE=4 SV=1
6	sp|P54869|HMCS2_MOUSE	2127	57300	107 (92)	27 (25)	6.47	Hydroxymethylglutaryl-CoA synthase, mitochondrial OS=Mus musculus GN=Hmgcs2 PE=1 SV=2
7	sp|P56480|ATPB_MOUSE	1942	56265	101 (89)	27 (26)	8.71	ATP synthase subunit beta, mitochondrial OS=Mus musculus GN=Atp5b PE=1 SV=2
8	sp|P63038|CH60_MOUSE	1782	61088	75 (69)	36 (35)	12.07	60 kDa heat shock protein, mitochondrial OS=Mus musculus GN=Hspd1 PE=1 SV=1
9	sp|Q03265|ATPA_MOUSE	1761	59830	86 (79)	33 (31)	7.97	ATP synthase subunit alpha, mitochondrial OS=Mus musculus GN=Atp5a1 PE=1 SV=1
10	tr|Q3UJ34|Q3UJ34_MOUSE	1725	46840	72 (66)	25 (23)	8.45	MCG19004 OS=Mus musculus GN=Ass1 PE=1 SV=1
11	sp|Q8R0Y6|AL1L1_MOUSE	1545	99502	77 (68)	49 (42)	4.57	Cytosolic 10-formyltetrahydrofolate dehydrogenase OS=Mus musculus GN=Aldh1l1 PE=1 SV=1
12.1	tr|A0A075B5N3|A0A075B5N3_MOUSE	1535	11010	97 (81)	5 (5)	5.76	Immunoglobulin kappa variable 8-28 OS=Mus musculus GN=Igkv8-28 PE=1 SV=7
12.2	tr|A2NHM3|A2NHM3_MOUSE	970	24435	46 (43)	12 (12)	6.79	If kappa light chain (Fragment) OS=Mus musculus GN=Igkc PE=1 SV=1
12.3	tr|I6L9E2|I6L9E2_MOUSE	910	26130	46 (42)	11 (11)	5.09	Uncharacterized protein OS=Mus musculus PE=2 SV=1
12.4	tr|Q6KB05|Q6KB05_MOUSE	363	27656	58 (44)	4 (4)	0.58	ScFv B8E5 protein (Fragment) OS=Mus musculus GN=scFv B8E5 PE=1 SV=1
12.5	tr|A0A097PUD0|A0A097PUD0_MOUSE	139	25885	4 (4)	4 (4)	0.63	Anti-dectin-1 15E2 light chain OS=Mus musculus PE=2 SV=1
12.6	tr|A2N494|A2N494_MOUSE	120	12738	5 (5)	5 (5)	2.28	Aberrantly recombined kappa chain Vk8/J1 region (Fragment) OS=Mus musculus PE=1 SV=1
12.7	sp|P01631|KV2A7_MOUSE	91	12379	2 (2)	2 (2)	0.63	Ig kappa chain V-II region 26-10 OS=Mus musculus PE=1 SV=1
12.8	tr|A0A0B4J1I9|A0A0B4J1I9_MOUSE	83	12842	2 (2)	2 (2)	0.6	Immunoglobulin kappa variable 4-55 (Fragment) OS=Mus musculus GN=Igkv4-55 PE=1 SV=1
12.9	tr|A0A075B5N4|A0A075B5N4_MOUSE	78	11083	3 (3)	3 (3)	1.25	Immunoglobulin kappa chain variable 8-27 OS=Mus musculus GN=Igkv8-27 PE=4 SV=1
12.1	tr|A0A140T8P5|A0A140T8P5_MOUSE	71	13426	3 (3)	3 (3)	0.97	Immunoglobulin kappa chain variable 8-24 (Fragment) OS=Mus musculus GN=Igkv8-24 PE=4 SV=2
12.11	tr|A0A075B5N9|A0A075B5N9_MOUSE	66	10963	2 (2)	2 (2)	0.73	Immunoglobulin kappa variable 3-7 OS=Mus musculus GN=Igkv3-7 PE=4 SV=7
12.12	tr|A0A075B5M4|A0A075B5M4_MOUSE	66	12829	2 (2)	2 (2)	0.6	Immunoglobulin kappa variable 4-57-1 (Fragment) OS=Mus musculus GN=Igkv4-57-1 PE=4 SV=1
12.13	tr|A0A140T8P6|A0A140T8P6_MOUSE	62	12725	2 (2)	2 (2)	0.61	Immunoglobulin kappa variable 12-46 (Fragment) OS=Mus musculus GN=Igkv12-46 PE=1 SV=2
12.14	sp|P01654|KV3A1_MOUSE	54	12087	2 (2)	2 (2)	0.65	Ig kappa chain V-III region PC 2880/PC 1229 OS=Mus musculus PE=1 SV=1
12.15	tr|A0A0B4J1H7|A0A0B4J1H7_MOUSE	41	13411	2 (2)	2 (2)	0.57	Immunoglobulin kappa variable 1-135 (Fragment) OS=Mus musculus GN=Igkv1-135 PE=4 SV=1
13	sp|Q8BMS1|ECHA_MOUSE	1510	83302	52 (50)	23 (21)	2.07	Trifunctional enzyme subunit alpha, mitochondrial OS=Mus musculus GN=Hadha PE=1 SV=1
14	tr|Q3T9S7|Q3T9S7_MOUSE	1396	130519	70 (64)	42 (37)	2.28	Pyruvate carboxylase OS=Mus musculus GN=Pcx PE=2 SV=1
15	tr|A0A0A0MQF6|A0A0A0MQF6_MOUSE	1343	38914	53 (51)	11 (11)	2.13	Glyceraldehyde-3-phosphate dehydrogenase OS=Mus musculus GN=Gapdh PE=1 SV=1
16	tr|Q3TVM2|Q3TVM2_MOUSE	1328	57073	56 (51)	22 (20)	3.3	Uncharacterized protein OS=Mus musculus GN=Aldh2 PE=2 SV=1
17	sp|Q9DBM2|ECHP_MOUSE	1208	78822	53 (44)	27 (25)	2.84	Peroxisomal bifunctional enzyme OS=Mus musculus GN=Ehhadh PE=1 SV=4
18	tr|Q8C6E3|Q8C6E3_MOUSE	1197	60083	55 (49)	28 (23)	3.95	Catalase OS=Mus musculus GN=Cat PE=2 SV=1
19	tr|Q5FW97|Q5FW97_MOUSE	1191	47453	50 (45)	22 (20)	5.13	Enolase 1, alpha non-neuron OS=Mus musculus GN=EG433182 PE=1 SV=1
20	sp|Q9QXD6|F16P1_MOUSE	1185	37288	46 (45)	16 (16)	6.7	Fructose-1,6-bisphosphatase 1 OS=Mus musculus GN=Fbp1 PE=1 SV=3
21	tr|Q3TF14|Q3TF14_MOUSE	1178	48170	63 (54)	25 (22)	5.82	Adenosylhomocysteinase OS=Mus musculus GN=Ahcy PE=1 SV=1
22	sp|Q9DBT9|M2GD_MOUSE	1164	97422	54 (54)	32 (32)	2.51	Dimethylglycine dehydrogenase, mitochondrial OS=Mus musculus GN=Dmgdh PE=1 SV=1
23	sp|P19157|GSTP1_MOUSE	1160	23765	51 (46)	10 (8)	4.55	Glutathione S-transferase P 1 OS=Mus musculus GN=Gstp1 PE=1 SV=2
24.1	tr|Q3TJ66|Q3TJ66_MOUSE	1086	39952	66 (58)	24 (23)	10.77	Fructose-bisphosphate aldolase OS=Mus musculus GN=Aldob PE=2 SV=1
24.2	sp|P05064|ALDOA_MOUSE	121	39787	4 (4)	4 (4)	0.38	Fructose-bisphosphate aldolase A OS=Mus musculus GN=Aldoa PE=1 SV=2
24.3	tr|A6ZI46|A6ZI46_MOUSE	97	45885	7 (5)	4 (4)	0.32	Fructose-bisphosphate aldolase OS=Mus musculus GN=Aldoart1 PE=1 SV=1
25	tr|Q3TQD9|Q3TQD9_MOUSE	1001	100662	52 (47)	32 (29)	1.97	Uncharacterized protein (Fragment) OS=Mus musculus GN=Sardh PE=2 SV=1
26	sp|P19096|FAS_MOUSE	999	274994	46 (44)	38 (37)	0.62	Fatty acid synthase OS=Mus musculus GN=Fasn PE=1 SV=2
27.1	tr|B2RRX1|B2RRX1_MOUSE	991	42052	41 (38)	16 (16)	5.62	Actin, beta OS=Mus musculus GN=Actb PE=2 SV=1
27.2	sp|P63260|ACTG_MOUSE	981	42108	41 (38)	16 (16)	5.62	Actin, cytoplasmic 2 OS=Mus musculus GN=Actg1 PE=1 SV=1
28	sp|Q9R0H0|ACOX1_MOUSE	971	75000	51 (48)	27 (25)	2.93	Peroxisomal acyl-coenzyme A oxidase 1 OS=Mus musculus GN=Acox1 PE=1 SV=5
29	tr|Q3UEQ9|Q3UEQ9_MOUSE	968	103650	39 (37)	25 (23)	1.54	Aminoadipate-semialdehyde synthase OS=Mus musculus GN=Aass PE=1 SV=1
30	sp|P26039|TLN1_MOUSE	950	271820	38 (37)	37 (36)	0.55	Talin-1 OS=Mus musculus GN=Tln1 PE=1 SV=2
31	tr|Q546G4|Q546G4_MOUSE	949	70700	42 (37)	26 (24)	2.73	Albumin 1 OS=Mus musculus GN=Alb PE=1 SV=1
32	sp|Q61176|ARGI1_MOUSE	939	34957	38 (36)	15 (15)	4.59	Arginase-1 OS=Mus musculus GN=Arg1 PE=1 SV=1
33	tr|Q3UA81|Q3UA81_MOUSE	911	50423	52 (46)	15 (13)	2.78	Elongation factor 1-alpha OS=Mus musculus GN=Eef1a1 PE=2 SV=1
34	sp|P32020|NLTP_MOUSE	906	59715	41 (36)	23 (20)	3.03	Non-specific lipid-transfer protein OS=Mus musculus GN=Scp2 PE=1 SV=3
35	tr|A2APM1|A2APM1_MOUSE	881	72614	52 (52)	3 (3)	0.19	CD44 antigen OS=Mus musculus GN=Cd44 PE=1 SV=1
36	tr|Q3UQ71|Q3UQ71_MOUSE	868	63073	40 (39)	20 (20)	2.94	Uncharacterized protein OS=Mus musculus GN=Ephx2 PE=2 SV=1
37.1	tr|D3Z041|D3Z041_MOUSE	859	79011	43 (34)	26 (21)	1.88	Long-chain-fatty-acid--CoA ligase 1 OS=Mus musculus GN=Acsl1 PE=1 SV=1
37.2	sp|Q8JZR0|ACSL5_MOUSE	192	77013	14 (10)	11 (10)	0.52	Long-chain-fatty-acid--CoA ligase 5 OS=Mus musculus GN=Acsl5 PE=1 SV=1
38.1	tr|A0A0R4J135|A0A0R4J135_MOUSE	804	53165	33 (30)	19 (18)	2.75	Selenium-binding protein 2 OS=Mus musculus GN=Selenbp2 PE=1 SV=1
38.2	sp|P17563|SBP1_MOUSE	781	53051	31 (29)	18 (17)	2.54	Selenium-binding protein 1 OS=Mus musculus GN=Selenbp1 PE=1 SV=2
39	sp|P26443|DHE3_MOUSE	804	61640	48 (43)	25 (23)	4.56	Glutamate dehydrogenase 1, mitochondrial OS=Mus musculus GN=Glud1 PE=1 SV=1
40.1	tr|Q3U9G2|Q3U9G2_MOUSE	793	72475	41 (37)	33 (29)	3.93	Uncharacterized protein OS=Mus musculus GN=Hspa5 PE=2 SV=1
40.2	sp|P63017|HSP7C_MOUSE	599	71055	30 (28)	18 (18)	1.83	Heat shock cognate 71 kDa protein OS=Mus musculus GN=Hspa8 PE=1 SV=1
41	sp|Q8K2B3|SDHA_MOUSE	791	73623	31 (24)	21 (16)	1.39	Succinate dehydrogenase [ubiquinone] flavoprotein subunit, mitochondrial OS=Mus musculus GN=Sdha PE=1 SV=1
42	sp|Q8CHT0|AL4A1_MOUSE	762	62258	28 (26)	17 (15)	1.52	Delta-1-pyrroline-5-carboxylate dehydrogenase, mitochondrial OS=Mus musculus GN=Aldh4a1 PE=1 SV=3
43	sp|Q9ET01|PYGL_MOUSE	756	97857	48 (40)	27 (23)	1.68	Glycogen phosphorylase, liver form OS=Mus musculus GN=Pygl PE=1 SV=4
44	sp|Q8QZT1|THIL_MOUSE	753	45129	29 (26)	16 (15)	4.06	Acetyl-CoA acetyltransferase, mitochondrial OS=Mus musculus GN=Acat1 PE=1 SV=1
45	sp|Q01853|TERA_MOUSE	750	89950	29 (26)	17 (15)	0.9	Transitional endoplasmic reticulum ATPase OS=Mus musculus GN=Vcp PE=1 SV=4
46	sp|P38647|GRP75_MOUSE	742	73701	30 (29)	26 (26)	2.39	Stress-70 protein, mitochondrial OS=Mus musculus GN=Hspa9 PE=1 SV=3
47	tr|Q3TF72|Q3TF72_MOUSE	733	57452	42 (36)	23 (20)	3.49	Protein disulfide-isomerase OS=Mus musculus GN=P4hb PE=2 SV=1
48	tr|Q8R1A8|Q8R1A8_MOUSE	733	39511	39 (32)	18 (15)	3.25	Ornithine carbamoyltransferase, mitochondrial OS=Mus musculus GN=Otc PE=1 SV=1
49	sp|Q8VC30|TKFC_MOUSE	719	59938	30 (27)	20 (18)	2.6	Triokinase/FMN cyclase OS=Mus musculus GN=Tkfc PE=1 SV=1
50	sp|Q9DBF1|AL7A1_MOUSE	716	59337	32 (28)	14 (13)	1.24	Alpha-aminoadipic semialdehyde dehydrogenase OS=Mus musculus GN=Aldh7a1 PE=1 SV=4
51	tr|E9QJW0|E9QJW0_MOUSE	715	25947	25 (25)	7 (7)	3.81	Microsomal glutathione S-transferase 1 OS=Mus musculus GN=Mgst1 PE=1 SV=1
52.1	sp|Q63880|EST3A_MOUSE	710	63677	38 (33)	15 (14)	1.35	Carboxylesterase 3A OS=Mus musculus GN=Ces3a PE=1 SV=2
52.2	sp|Q8VCU1|EST3B_MOUSE	420	63712	24 (22)	11 (10)	0.74	Carboxylesterase 3B OS=Mus musculus GN=Ces3b PE=1 SV=2
53	sp|Q4LDG0|S27A5_MOUSE	709	77123	23 (23)	13 (13)	1.03	Bile acyl-CoA synthetase OS=Mus musculus GN=Slc27a5 PE=1 SV=2
54	sp|P50544|ACADV_MOUSE	680	71230	25 (25)	19 (19)	1.82	Very long-chain specific acyl-CoA dehydrogenase, mitochondrial OS=Mus musculus GN=Acadvl PE=1 SV=3
55	sp|Q9QXF8|GNMT_MOUSE	678	33110	34 (33)	9 (9)	1.86	Glycine N-methyltransferase OS=Mus musculus GN=Gnmt PE=1 SV=3
56	tr|B2RXW1|B2RXW1_MOUSE	660	72897	25 (25)	14 (14)	1.21	Histidine ammonia-lyase OS=Mus musculus GN=Hal PE=1 SV=1
57	tr|Q5HZJ8|Q5HZJ8_MOUSE	653	47044	28 (25)	20 (18)	3.75	Isocitrate dehydrogenase [NADP] OS=Mus musculus GN=Idh1 PE=2 SV=1
58.1	sp|Q8VCT4|CES1D_MOUSE	637	62034	39 (34)	20 (17)	2.28	Carboxylesterase 1D OS=Mus musculus GN=Ces1d PE=1 SV=1
58.2	sp|Q91WU0|CES1F_MOUSE	543	61972	32 (28)	22 (19)	2.64	Carboxylesterase 1F OS=Mus musculus GN=Ces1f PE=1 SV=1
58.3	sp|Q8VCC2|EST1_MOUSE	146	63039	11 (9)	8 (7)	0.5	Liver carboxylesterase 1 OS=Mus musculus GN=Ces1 PE=1 SV=1
58.4	sp|P23953|EST1C_MOUSE	74	61302	6 (4)	4 (3)	0.17	Carboxylesterase 1C OS=Mus musculus GN=Ces1c PE=1 SV=4
58.5	sp|Q64176|EST1E_MOUSE	61	61828	6 (4)	5 (4)	0.23	Carboxylesterase 1E OS=Mus musculus GN=Ces1e PE=1 SV=1
58.6	tr|D3Z5G7|D3Z5G7_MOUSE	53	62500	7 (4)	4 (3)	0.17	Carboxylic ester hydrolase OS=Mus musculus GN=Ces1b PE=1 SV=1
59	tr|Q3UKA4|Q3UKA4_MOUSE	622	40601	34 (28)	15 (12)	2.23	Alcohol dehydrogenase 1 (Class I), isoform CRA_c OS=Mus musculus GN=Adh1 PE=1 SV=1
60.1	sp|P24549|AL1A1_MOUSE	608	55060	32 (28)	21 (17)	2.39	Retinal dehydrogenase 1 OS=Mus musculus GN=Aldh1a1 PE=1 SV=5
60.2	sp|O35945|AL1A7_MOUSE	364	55009	20 (17)	15 (12)	1.13	Aldehyde dehydrogenase, cytosolic 1 OS=Mus musculus GN=Aldh1a7 PE=1 SV=1
61	tr|Q3UUH0|Q3UUH0_MOUSE	605	51908	29 (26)	22 (19)	2.64	Uncharacterized protein OS=Mus musculus GN=Asl PE=2 SV=1
62	tr|Q9ESH4|Q9ESH4_MOUSE	582	149333	23 (21)	16 (14)	0.44	Aldehyde oxidase homolog-1 OS=Mus musculus GN=Aox3 PE=2 SV=1
63.1	tr|Q71LX8|Q71LX8_MOUSE	579	83571	30 (28)	23 (22)	1.62	Heat shock protein 84b OS=Mus musculus GN=Hsp90ab1 PE=1 SV=1
63.2	sp|P08113|ENPL_MOUSE	515	92703	28 (25)	23 (22)	1.22	Endoplasmin OS=Mus musculus GN=Hsp90b1 PE=1 SV=2
63.3	sp|P07901|HS90A_MOUSE	368	85134	17 (15)	17 (15)	0.76	Heat shock protein HSP 90-alpha OS=Mus musculus GN=Hsp90aa1 PE=1 SV=4
63.4	sp|Q9CQN1|TRAP1_MOUSE	137	80501	6 (5)	6 (5)	0.22	Heat shock protein 75 kDa, mitochondrial OS=Mus musculus GN=Trap1 PE=1 SV=1
64	tr|Q3UDC8|Q3UDC8_MOUSE	577	96119	35 (31)	19 (17)	0.89	Uncharacterized protein OS=Mus musculus GN=Eef2 PE=2 SV=1
65	tr|Q5SXR6|Q5SXR6_MOUSE	573	193631	25 (25)	20 (20)	0.44	Clathrin heavy chain OS=Mus musculus GN=Cltc PE=1 SV=1
66	sp|P09411|PGK1_MOUSE	573	44921	26 (24)	16 (14)	2.58	Phosphoglycerate kinase 1 OS=Mus musculus GN=Pgk1 PE=1 SV=4
67	sp|P05202|AATM_MOUSE	565	47780	38 (33)	18 (15)	2.81	Aspartate aminotransferase, mitochondrial OS=Mus musculus GN=Got2 PE=1 SV=1
68.1	sp|Q921H8|THIKA_MOUSE	562	44382	19 (18)	12 (11)	1.93	3-ketoacyl-CoA thiolase A, peroxisomal OS=Mus musculus GN=Acaa1a PE=1 SV=1
68.2	sp|Q8VCH0|THIKB_MOUSE	496	44481	20 (20)	11 (11)	2.14	3-ketoacyl-CoA thiolase B, peroxisomal OS=Mus musculus GN=Acaa1b PE=1 SV=1
69.1	sp|Q63886|UD11_MOUSE	561	60749	26 (22)	14 (12)	1.45	UDP-glucuronosyltransferase 1-1 OS=Mus musculus GN=Ugt1a1 PE=1 SV=2
69.2	tr|Q8R084|Q8R084_MOUSE	354	60802	13 (13)	11 (11)	0.98	UDP-glucuronosyltransferase OS=Mus musculus GN=Ugt2b1 PE=1 SV=1
69.3	sp|P17717|UDB17_MOUSE	315	61386	19 (16)	9 (8)	0.97	UDP-glucuronosyltransferase 2B17 OS=Mus musculus GN=Ugt2b17 PE=1 SV=1
69.4	sp|Q62452|UD19_MOUSE	273	60710	14 (13)	7 (7)	0.69	UDP-glucuronosyltransferase 1-9 OS=Mus musculus GN=Ugt1a9 PE=1 SV=3
69.5	sp|Q64435|UD16_MOUSE	267	61026	14 (12)	8 (7)	0.69	UDP-glucuronosyltransferase 1-6 OS=Mus musculus GN=Ugt1a6 PE=1 SV=1
69.6	tr|B9EIY3|B9EIY3_MOUSE	263	61558	13 (12)	6 (5)	0.6	UDP-glucuronosyltransferase OS=Mus musculus GN=Ugt2b36 PE=2 SV=1
69.7	sp|Q8BWQ1|UD2A3_MOUSE	262	61821	14 (12)	10 (9)	0.68	UDP-glucuronosyltransferase 2A3 OS=Mus musculus GN=Ugt2a3 PE=1 SV=1
69.8	tr|Q8K154|Q8K154_MOUSE	217	61351	14 (14)	8 (8)	0.87	UDP-glucuronosyltransferase OS=Mus musculus GN=Ugt2b34 PE=1 SV=1
70	sp|Q99KI0|ACON_MOUSE	545	86151	32 (27)	21 (19)	1.36	Aconitate hydratase, mitochondrial OS=Mus musculus GN=Aco2 PE=1 SV=1
71	sp|Q99LC5|ETFA_MOUSE	545	35330	23 (21)	14 (13)	2.84	Electron transfer flavoprotein subunit alpha, mitochondrial OS=Mus musculus GN=Etfa PE=1 SV=2
72	sp|P16015|CAH3_MOUSE	539	29633	30 (28)	13 (13)	6.55	Carbonic anhydrase 3 OS=Mus musculus GN=Ca3 PE=1 SV=3
73	sp|P61922|GABT_MOUSE	533	57100	23 (21)	12 (12)	1.32	4-aminobutyrate aminotransferase, mitochondrial OS=Mus musculus GN=Abat PE=1 SV=1
74.1	sp|P68368|TBA4A_MOUSE	476	50634	20 (18)	11 (11)	1.27	Tubulin alpha-4A chain OS=Mus musculus GN=Tuba4a PE=1 SV=1
74.2	sp|P68369|TBA1A_MOUSE	311	50788	17 (15)	11 (11)	1.26	Tubulin alpha-1A chain OS=Mus musculus GN=Tuba1a PE=1 SV=1
75.1	tr|A0A1B0GSR9|A0A1B0GSR9_MOUSE	524	34919	22 (21)	14 (14)	3.67	L-lactate dehydrogenase OS=Mus musculus GN=Ldha PE=1 SV=1
75.2	tr|Q3THB4|Q3THB4_MOUSE	396	36818	15 (14)	11 (11)	2.06	L-lactate dehydrogenase OS=Mus musculus GN=Ldha PE=2 SV=1
76	sp|Q64442|DHSO_MOUSE	510	38795	22 (18)	13 (10)	2.14	Sorbitol dehydrogenase OS=Mus musculus GN=Sord PE=1 SV=3
77	sp|P33267|CP2F2_MOUSE	505	56141	27 (24)	16 (15)	1.63	Cytochrome P450 2F2 OS=Mus musculus GN=Cyp2f2 PE=1 SV=1
78	sp|P40142|TKT_MOUSE	502	68272	22 (22)	14 (14)	1.33	Transketolase OS=Mus musculus GN=Tkt PE=1 SV=1
79	tr|A2ACG7|A2ACG7_MOUSE	492	67460	18 (18)	9 (9)	0.85	Dolichyl-diphosphooligosaccharide--protein glycosyltransferase subunit 2 OS=Mus musculus GN=Rpn2 PE=1 SV=1
80	sp|Q91X83|METK1_MOUSE	481	44051	22 (21)	9 (8)	1.21	S-adenosylmethionine synthase isoform type-1 OS=Mus musculus GN=Mat1a PE=1 SV=1
81	sp|P35505|FAAA_MOUSE	478	46488	14 (14)	10 (10)	1.28	Fumarylacetoacetase OS=Mus musculus GN=Fah PE=1 SV=2
82	tr|Q8C140|Q8C140_MOUSE	474	74691	25 (23)	16 (16)	1.17	Uncharacterized protein OS=Mus musculus GN=Slc25a13 PE=2 SV=1
83	sp|Q07417|ACADS_MOUSE	454	45146	16 (16)	9 (9)	1.17	Short-chain specific acyl-CoA dehydrogenase, mitochondrial OS=Mus musculus GN=Acads PE=1 SV=2
84	sp|Q8VDN2|AT1A1_MOUSE	449	114221	18 (18)	16 (16)	0.62	Sodium/potassium-transporting ATPase subunit alpha-1 OS=Mus musculus GN=Atp1a1 PE=1 SV=1
85	tr|Q3TT11|Q3TT11_MOUSE	435	79954	18 (17)	15 (14)	0.98	Uncharacterized protein OS=Mus musculus GN=Hsd17b4 PE=2 SV=1
86.1	sp|Q9EQ20|MMSA_MOUSE	417	58335	25 (21)	14 (13)	1.54	Methylmalonate-semialdehyde dehydrogenase [acylating], mitochondrial OS=Mus musculus GN=Aldh6a1 PE=1 SV=1
86.2	tr|Q8K0L1|Q8K0L1_MOUSE	338	50018	19 (17)	12 (11)	1.29	Aldh6a1 protein OS=Mus musculus GN=Aldh6a1 PE=2 SV=1
87	sp|O35488|S27A2_MOUSE	410	71176	20 (19)	15 (14)	0.88	Very long-chain acyl-CoA synthetase OS=Mus musculus GN=Slc27a2 PE=1 SV=2
88	sp|Q8BH00|AL8A1_MOUSE	400	54371	16 (14)	11 (11)	1.15	Aldehyde dehydrogenase family 8 member A1 OS=Mus musculus GN=Aldh8a1 PE=1 SV=1
89	tr|Q3TC53|Q3TC53_MOUSE	394	51915	12 (12)	8 (8)	0.85	Adenylyl cyclase-associated protein OS=Mus musculus GN=Cap1 PE=2 SV=1
90	tr|Q3UEL5|Q3UEL5_MOUSE	393	79173	20 (16)	13 (9)	0.63	Urocanate hydratase OS=Mus musculus GN=Uroc1 PE=1 SV=1
91.1	sp|P68372|TBB4B_MOUSE	391	50255	30 (26)	19 (17)	3.04	Tubulin beta-4B chain OS=Mus musculus GN=Tubb4b PE=1 SV=1
91.2	sp|P99024|TBB5_MOUSE	352	50095	24 (23)	16 (15)	2.58	Tubulin beta-5 chain OS=Mus musculus GN=Tubb5 PE=1 SV=1
91.3	sp|Q7TMM9|TBB2A_MOUSE	339	50274	23 (21)	15 (13)	2.14	Tubulin beta-2A chain OS=Mus musculus GN=Tubb2a PE=1 SV=1
91.4	sp|Q9D6F9|TBB4A_MOUSE	315	50010	20 (17)	14 (13)	1.77	Tubulin beta-4A chain OS=Mus musculus GN=Tubb4a PE=1 SV=3
91.5	sp|Q922F4|TBB6_MOUSE	216	50514	15 (13)	10 (8)	1	Tubulin beta-6 chain OS=Mus musculus GN=Tubb6 PE=1 SV=1
92	tr|Q3V117|Q3V117_MOUSE	391	121630	21 (20)	16 (15)	0.57	ATP-citrate synthase OS=Mus musculus GN=Acly PE=1 SV=1
93	tr|Q3UDA8|Q3UDA8_MOUSE	386	74447	18 (16)	13 (12)	0.91	Uncharacterized protein OS=Mus musculus GN=Cpt2 PE=2 SV=1
94	tr|A2AVJ7|A2AVJ7_MOUSE	385	158757	22 (19)	19 (17)	0.44	Ribosome-binding protein 1 OS=Mus musculus GN=Rrbp1 PE=1 SV=1
95	sp|Q9CPY7|AMPL_MOUSE	384	56505	19 (18)	14 (14)	1.47	Cytosol aminopeptidase OS=Mus musculus GN=Lap3 PE=1 SV=3
96	tr|A2AFQ2|A2AFQ2_MOUSE	384	28470	14 (12)	9 (7)	1.71	3-hydroxyacyl-CoA dehydrogenase type-2 OS=Mus musculus GN=Hsd17b10 PE=1 SV=1
97	sp|Q61425|HCDH_MOUSE	378	34613	18 (16)	8 (6)	1.5	Hydroxyacyl-coenzyme A dehydrogenase, mitochondrial OS=Mus musculus GN=Hadh PE=1 SV=2
98	sp|Q9DCW4|ETFB_MOUSE	360	27834	18 (18)	12 (12)	4.44	Electron transfer flavoprotein subunit beta OS=Mus musculus GN=Etfb PE=1 SV=3
99	tr|Q8CI38|Q8CI38_MOUSE	359	50699	18 (18)	12 (12)	1.41	Homogentisate 1, 2-dioxygenase OS=Mus musculus GN=Hgd PE=2 SV=2
100	sp|Q99L13|3HIDH_MOUSE	358	35816	10 (10)	8 (8)	1.22	3-hydroxyisobutyrate dehydrogenase, mitochondrial OS=Mus musculus GN=Hibadh PE=1 SV=1
101.1	tr|Q545A2|Q545A2_MOUSE	356	33138	18 (16)	10 (9)	1.85	MCG11560 OS=Mus musculus GN=Slc25a5 PE=1 SV=1
101.2	sp|P48962|ADT1_MOUSE	345	33111	15 (14)	7 (7)	1.36	ADP/ATP translocase 1 OS=Mus musculus GN=Slc25a4 PE=1 SV=4
102	tr|A0A0A0MQ68|A0A0A0MQ68_MOUSE	355	50052	11 (11)	8 (8)	0.78	Glutaryl-CoA dehydrogenase, mitochondrial OS=Mus musculus GN=Gcdh PE=1 SV=1
103	sp|Q91VA0|ACSM1_MOUSE	352	65517	17 (16)	14 (13)	1.08	Acyl-coenzyme A synthetase ACSM1, mitochondrial OS=Mus musculus GN=Acsm1 PE=1 SV=1
104.1	sp|P24456|CP2DA_MOUSE	351	57539	16 (15)	10 (10)	1.06	Cytochrome P450 2D10 OS=Mus musculus GN=Cyp2d10 PE=1 SV=2
104.2	sp|P11714|CP2D9_MOUSE	311	57255	16 (15)	11 (10)	0.95	Cytochrome P450 2D9 OS=Mus musculus GN=Cyp2d9 PE=1 SV=2
104.3	sp|Q8CIM7|CP2DQ_MOUSE	220	57224	10 (7)	7 (5)	0.4	Cytochrome P450 2D26 OS=Mus musculus GN=Cyp2d26 PE=1 SV=1
104.4	tr|Q91W87|Q91W87_MOUSE	148	57027	8 (6)	6 (4)	0.32	Cytochrome P450, family 2, subfamily d, polypeptide 22 OS=Mus musculus GN=Cyp2d22 PE=2 SV=1
105	sp|Q99JY0|ECHB_MOUSE	349	51639	17 (16)	13 (12)	1.38	Trifunctional enzyme subunit beta, mitochondrial OS=Mus musculus GN=Hadhb PE=1 SV=1
106	tr|Q3UEM0|Q3UEM0_MOUSE	343	37423	18 (17)	13 (12)	2.01	MCG9091, isoform CRA_d OS=Mus musculus GN=Akr1c6 PE=1 SV=1
107	sp|Q8VCW8|ACSF2_MOUSE	341	68591	20 (17)	16 (14)	1.21	Acyl-CoA synthetase family member 2, mitochondrial OS=Mus musculus GN=Acsf2 PE=1 SV=1
108	tr|Q6PF96|Q6PF96_MOUSE	339	61749	20 (18)	15 (13)	1.18	Electron transfer flavoprotein-ubiquinone oxidoreductase, mitochondrial OS=Mus musculus GN=Etfdh PE=1 SV=1
109	sp|P52760|RIDA_MOUSE	338	14304	9 (9)	7 (7)	3.45	2-iminobutanoate/2-iminopropanoate deaminase OS=Mus musculus GN=Rida PE=1 SV=3
110	tr|Q3TIC8|Q3TIC8_MOUSE	336	53347	13 (13)	9 (9)	1.18	Uncharacterized protein OS=Mus musculus GN=Uqcrc1 PE=2 SV=1
111.1	sp|P56593|CP2AC_MOUSE	332	56314	17 (14)	13 (11)	1.09	Cytochrome P450 2A12 OS=Mus musculus GN=Cyp2a12 PE=1 SV=2
111.2	sp|P20852|CP2A5_MOUSE	71	56818	4 (4)	4 (4)	0.25	Cytochrome P450 2A5 OS=Mus musculus GN=Cyp2a5 PE=2 SV=1
112.1	sp|P10649|GSTM1_MOUSE	331	26067	22 (19)	13 (12)	5.09	Glutathione S-transferase Mu 1 OS=Mus musculus GN=Gstm1 PE=1 SV=2
112.2	tr|F6WHQ7|F6WHQ7_MOUSE	153	22744	11 (8)	7 (6)	1.62	Glutathione S-transferase Mu 1 (Fragment) OS=Mus musculus GN=Gstm1 PE=1 SV=1
113	tr|Q3TW74|Q3TW74_MOUSE	331	101790	23 (18)	21 (16)	0.77	Uncharacterized protein OS=Mus musculus GN=Mthfd1 PE=2 SV=1
114	sp|P45952|ACADM_MOUSE	330	46908	16 (12)	10 (9)	0.97	Medium-chain specific acyl-CoA dehydrogenase, mitochondrial OS=Mus musculus GN=Acadm PE=1 SV=1
115	sp|O08601|MTP_MOUSE	328	99664	22 (20)	19 (18)	0.85	Microsomal triglyceride transfer protein large subunit OS=Mus musculus GN=Mttp PE=1 SV=2
116	tr|Q3UMP2|Q3UMP2_MOUSE	326	34728	13 (13)	8 (8)	1.49	Uncharacterized protein OS=Mus musculus GN=Hmgcl PE=2 SV=1
117.1	tr|Q9CZN7|Q9CZN7_MOUSE	322	56237	15 (15)	11 (11)	0.87	Serine hydroxymethyltransferase OS=Mus musculus GN=Shmt2 PE=1 SV=1
117.2	sp|P50431|GLYC_MOUSE	156	53138	5 (5)	3 (3)	0.2	Serine hydroxymethyltransferase, cytosolic OS=Mus musculus GN=Shmt1 PE=1 SV=3
118	sp|P49429|HPPD_MOUSE	311	45254	16 (15)	13 (12)	1.68	4-hydroxyphenylpyruvate dioxygenase OS=Mus musculus GN=Hpd PE=1 SV=3
119.1	tr|G3X925|G3X925_MOUSE	307	62531	13 (12)	11 (10)	0.76	Pyruvate kinase OS=Mus musculus GN=Pklr PE=1 SV=1
119.2	sp|P52480|KPYM_MOUSE	167	58378	8 (7)	6 (5)	0.47	Pyruvate kinase PKM OS=Mus musculus GN=Pkm PE=1 SV=4
120	tr|Q3TJI8|Q3TJI8_MOUSE	302	28842	18 (16)	11 (10)	2.32	Corticosteroid 11-beta-dehydrogenase isozyme 1 OS=Mus musculus GN=Hsd11b1 PE=1 SV=1
121	sp|P97807|FUMH_MOUSE	294	54550	15 (12)	11 (9)	0.7	Fumarate hydratase, mitochondrial OS=Mus musculus GN=Fh PE=1 SV=3
122	sp|Q91XD4|FTCD_MOUSE	291	59529	14 (14)	11 (11)	1.01	Formimidoyltransferase-cyclodeaminase OS=Mus musculus GN=Ftcd PE=1 SV=1
123	sp|P55264|ADK_MOUSE	290	40466	14 (13)	12 (11)	1.77	Adenosine kinase OS=Mus musculus GN=Adk PE=1 SV=2
124	tr|Q9DBN7|Q9DBN7_MOUSE	290	32488	10 (10)	7 (7)	1.4	Uncharacterized protein OS=Mus musculus GN=Eci1 PE=2 SV=1
125	tr|A0A1Y7VJZ2|A0A1Y7VJZ2_MOUSE	288	24361	11 (11)	7 (7)	1.8	Glutathione transferase zeta 1 (Maleylacetoacetate isomerase), isoform CRA_c OS=Mus musculus GN=Gstz1 PE=4 SV=1
126	sp|P08249|MDHM_MOUSE	288	36045	16 (15)	12 (11)	1.63	Malate dehydrogenase, mitochondrial OS=Mus musculus GN=Mdh2 PE=1 SV=3
127	sp|P14152|MDHC_MOUSE	287	36659	12 (11)	8 (7)	1	Malate dehydrogenase, cytoplasmic OS=Mus musculus GN=Mdh1 PE=1 SV=3
128	tr|Q3TW51|Q3TW51_MOUSE	287	102651	21 (18)	20 (18)	0.76	Uncharacterized protein OS=Mus musculus GN=Snd1 PE=2 SV=1
129.1	tr|Q3TFG3|Q3TFG3_MOUSE	284	46381	11 (11)	9 (9)	1.13	Uncharacterized protein OS=Mus musculus GN=Eif4a1 PE=2 SV=1
129.2	sp|P10630|IF4A2_MOUSE	144	46601	6 (6)	6 (6)	0.51	Eukaryotic initiation factor 4A-II OS=Mus musculus GN=Eif4a2 PE=1 SV=2
129.3	sp|Q91VC3|IF4A3_MOUSE	104	47095	2 (2)	2 (2)	0.15	Eukaryotic initiation factor 4A-III OS=Mus musculus GN=Eif4a3 PE=1 SV=3
130	tr|A0A0J9YU79|A0A0J9YU79_MOUSE	282	33290	9 (8)	4 (4)	0.46	Ketohexokinase OS=Mus musculus GN=Khk PE=1 SV=1
131	tr|F2Z456|F2Z456_MOUSE	279	35192	8 (6)	6 (4)	0.43	NADH-cytochrome b5 reductase OS=Mus musculus GN=Cyb5r3 PE=1 SV=1
132	tr|B1AU25|B1AU25_MOUSE	279	66358	14 (13)	12 (12)	0.87	Apoptosis-inducing factor 1, mitochondrial OS=Mus musculus GN=Aifm1 PE=1 SV=1
133	tr|Q3TG52|Q3TG52_MOUSE	279	56807	13 (12)	11 (10)	0.97	Uncharacterized protein OS=Mus musculus GN=Aldh9a1 PE=2 SV=1
134	sp|Q8BVI4|DHPR_MOUSE	278	25782	9 (9)	7 (7)	1.65	Dihydropteridine reductase OS=Mus musculus GN=Qdpr PE=1 SV=2
135.1	sp|P26041|MOES_MOUSE	277	67839	15 (14)	12 (11)	0.76	Moesin OS=Mus musculus GN=Msn PE=1 SV=3
135.2	sp|P26043|RADI_MOUSE	217	68614	14 (12)	12 (10)	0.67	Radixin OS=Mus musculus GN=Rdx PE=1 SV=3
136	tr|Q8BSX3|Q8BSX3_MOUSE	277	70074	20 (14)	18 (12)	0.73	Uncharacterized protein OS=Mus musculus GN=Pck1 PE=2 SV=1
137	sp|O08749|DLDH_MOUSE	276	54751	18 (14)	11 (8)	0.9	Dihydrolipoyl dehydrogenase, mitochondrial OS=Mus musculus GN=Dld PE=1 SV=2
138	sp|Q64374|RGN_MOUSE	276	33899	15 (13)	11 (10)	2.07	Regucalcin OS=Mus musculus GN=Rgn PE=1 SV=1
139	tr|Q545S0|Q545S0_MOUSE	275	33673	13 (13)	8 (8)	1.56	Sulfurtransferase OS=Mus musculus GN=Tst PE=1 SV=1
140	sp|Q9DBA8|HUTI_MOUSE	274	47086	14 (14)	9 (9)	1.25	Probable imidazolonepropionase OS=Mus musculus GN=Amdhd1 PE=1 SV=1
141	sp|Q80XN0|BDH_MOUSE	273	38617	11 (9)	10 (8)	0.93	D-beta-hydroxybutyrate dehydrogenase, mitochondrial OS=Mus musculus GN=Bdh1 PE=1 SV=2
142	tr|B2RUK5|B2RUK5_MOUSE	273	61910	8 (7)	8 (7)	0.44	Methylcrotonoyl-Coenzyme A carboxylase 2 (Beta) OS=Mus musculus GN=Mccc2 PE=1 SV=1
143	sp|O35459|ECH1_MOUSE	272	36437	11 (11)	7 (7)	1.01	Delta(3,5)-Delta(2,4)-dienoyl-CoA isomerase, mitochondrial OS=Mus musculus GN=Ech1 PE=1 SV=1
144	sp|Q9JHI5|IVD_MOUSE	270	46695	16 (13)	11 (10)	1.27	Isovaleryl-CoA dehydrogenase, mitochondrial OS=Mus musculus GN=Ivd PE=1 SV=1
145	sp|Q9DB20|ATPO_MOUSE	267	23406	11 (8)	7 (5)	0.95	ATP synthase subunit O, mitochondrial OS=Mus musculus GN=Atp5o PE=1 SV=1
146	tr|A0A0R4J0I1|A0A0R4J0I1_MOUSE	262	46871	9 (7)	7 (5)	0.61	MCG1051009 OS=Mus musculus GN=Serpina3k PE=1 SV=1
147	tr|Q5RJV4|Q5RJV4_MOUSE	260	61631	14 (12)	11 (11)	0.87	Phosphoglucomutase 2 OS=Mus musculus GN=Pgm2 PE=2 SV=1
148	tr|Q5M8R8|Q5M8R8_MOUSE	260	34366	11 (11)	9 (9)	1.51	60S acidic ribosomal protein P0 OS=Mus musculus GN=Rplp0 PE=2 SV=1
149	tr|Q3UGC8|Q3UGC8_MOUSE	258	80498	11 (11)	9 (9)	0.49	Propionyl-Coenzyme A carboxylase, alpha polypeptide, isoform CRA_b OS=Mus musculus GN=Pcca PE=1 SV=1
150	sp|Q9CZS1|AL1B1_MOUSE	253	58087	15 (11)	10 (8)	0.64	Aldehyde dehydrogenase X, mitochondrial OS=Mus musculus GN=Aldh1b1 PE=1 SV=1
151	tr|Z4YJV4|Z4YJV4_MOUSE	247	117208	14 (12)	13 (11)	0.35	2-oxoglutarate dehydrogenase, mitochondrial OS=Mus musculus GN=Ogdh PE=1 SV=1
152	tr|Q3TR43|Q3TR43_MOUSE	243	84404	10 (9)	8 (7)	0.36	Uncharacterized protein OS=Mus musculus GN=Dpp4 PE=2 SV=1
153	tr|Q4FJK0|Q4FJK0_MOUSE	241	36476	13 (13)	9 (9)	1.6	Decr1 protein OS=Mus musculus GN=Decr1 PE=1 SV=1
154	tr|Q8VDC3|Q8VDC3_MOUSE	240	99724	17 (15)	11 (9)	0.47	Aconitate hydratase OS=Mus musculus GN=aco1 PE=3 SV=1
155	tr|A0A1S6GWH5|A0A1S6GWH5_MOUSE	240	125412	13 (13)	10 (10)	0.4	Uncharacterized protein OS=Mus musculus GN=Uba1 PE=2 SV=1
156	tr|A0A0R4J083|A0A0R4J083_MOUSE	240	48266	12 (11)	9 (8)	1.07	Long-chain-specific acyl-CoA dehydrogenase, mitochondrial OS=Mus musculus GN=Acadl PE=1 SV=1
157	sp|P17751|TPIS_MOUSE	239	32684	13 (11)	10 (9)	1.64	Triosephosphate isomerase OS=Mus musculus GN=Tpi1 PE=1 SV=4
158	sp|Q8CGC7|SYEP_MOUSE	238	171739	11 (11)	11 (11)	0.23	Bifunctional glutamate/proline--tRNA ligase OS=Mus musculus GN=Eprs PE=1 SV=4
159	tr|C6EQH3|C6EQH3_MOUSE	237	45039	9 (9)	9 (9)	0.89	Succinate--CoA ligase [GDP-forming] subunit beta, mitochondrial OS=Mus musculus GN=Suclg2 PE=2 SV=1
160	sp|P97872|FMO5_MOUSE	237	60532	14 (13)	12 (11)	0.99	Dimethylaniline monooxygenase [N-oxide-forming] 5 OS=Mus musculus GN=Fmo5 PE=1 SV=4
161	tr|Q3T9Z2|Q3T9Z2_MOUSE	237	35706	9 (7)	6 (5)	0.7	Glyoxylate reductase/hydroxypyruvate reductase OS=Mus musculus GN=Grhpr PE=1 SV=1
162	tr|A0A0G2JGI9|A0A0G2JGI9_MOUSE	236	147208	15 (10)	12 (9)	0.22	Amylo-1,6-glucosidase, 4-alpha-glucanotransferase OS=Mus musculus GN=Agl PE=1 SV=1
163.1	tr|K3W4L7|K3W4L7_MOUSE	235	32341	11 (11)	8 (8)	1.41	Phenazine biosynthesis-like domain-containing protein 1 OS=Mus musculus GN=Pbld1 PE=1 SV=1
163.2	sp|Q9CXN7|PBLD2_MOUSE	231	32191	12 (11)	9 (8)	1.42	Phenazine biosynthesis-like domain-containing protein 2 OS=Mus musculus GN=Pbld2 PE=1 SV=1
164.1	sp|Q91XE0|GLYAT_MOUSE	235	34361	16 (16)	12 (12)	3.36	Glycine N-acyltransferase OS=Mus musculus GN=Glyat PE=1 SV=1
164.2	sp|Q5FW57|GLYAL_MOUSE	161	34488	6 (6)	5 (5)	0.73	Glycine N-acyltransferase-like protein OS=Mus musculus GN=Gm4952 PE=1 SV=3
165	sp|P54071|IDHP_MOUSE	234	51330	11 (10)	10 (9)	0.75	Isocitrate dehydrogenase [NADP], mitochondrial OS=Mus musculus GN=Idh2 PE=1 SV=3
166	tr|A0PJE6|A0PJE6_MOUSE	234	58765	10 (9)	9 (8)	0.63	Pccb protein (Fragment) OS=Mus musculus GN=Pccb PE=2 SV=1
167.1	tr|Q3TJX0|Q3TJX0_MOUSE	233	70718	12 (10)	10 (9)	0.57	Uncharacterized protein OS=Mus musculus GN=Lcp1 PE=2 SV=1
167.2	sp|Q99K51|PLST_MOUSE	35	71210	2 (2)	2 (2)	0.09	Plastin-3 OS=Mus musculus GN=Pls3 PE=1 SV=3
168.1	sp|P11679|K2C8_MOUSE	230	54531	17 (12)	14 (11)	1.02	Keratin, type II cytoskeletal 8 OS=Mus musculus GN=Krt8 PE=1 SV=4
168.2	sp|P04104|K2C1_MOUSE	108	66079	7 (6)	5 (4)	0.27	Keratin, type II cytoskeletal 1 OS=Mus musculus GN=Krt1 PE=1 SV=4
168.3	sp|Q922U2|K2C5_MOUSE	78	61957	7 (5)	6 (5)	0.3	Keratin, type II cytoskeletal 5 OS=Mus musculus GN=Krt5 PE=1 SV=1
168.4	sp|Q8VED5|K2C79_MOUSE	52	57802	5 (3)	4 (3)	0.18	Keratin, type II cytoskeletal 79 OS=Mus musculus GN=Krt79 PE=1 SV=2
168.5	sp|Q3TTY5|K22E_MOUSE	34	71336	5 (2)	4 (2)	0.09	Keratin, type II cytoskeletal 2 epidermal OS=Mus musculus GN=Krt2 PE=1 SV=1
169	tr|Q3TVS6|Q3TVS6_MOUSE	229	38208	6 (5)	4 (4)	0.52	Uncharacterized protein OS=Mus musculus GN=Ctsb PE=2 SV=1
170	tr|B2MWM9|B2MWM9_MOUSE	226	48136	14 (12)	12 (10)	1.07	Calreticulin OS=Mus musculus GN=Calr PE=1 SV=1
171	tr|D3YZ54|D3YZ54_MOUSE	225	61812	12 (12)	11 (11)	0.86	2-hydroxyacyl-CoA lyase 1 OS=Mus musculus GN=Hacl1 PE=1 SV=2
172	tr|E0CXN5|E0CXN5_MOUSE	225	35835	8 (7)	6 (5)	0.56	Glycerol-3-phosphate dehydrogenase [NAD(+)] OS=Mus musculus GN=Gpd1 PE=1 SV=1
173	sp|P21981|TGM2_MOUSE	220	78153	15 (11)	12 (9)	0.57	Protein-glutamine gamma-glutamyltransferase 2 OS=Mus musculus GN=Tgm2 PE=1 SV=4
174	sp|P06745|G6PI_MOUSE	219	62955	5 (5)	3 (3)	0.23	Glucose-6-phosphate isomerase OS=Mus musculus GN=Gpi PE=1 SV=4
175	sp|P27773|PDIA3_MOUSE	218	57099	20 (15)	16 (13)	1.32	Protein disulfide-isomerase A3 OS=Mus musculus GN=Pdia3 PE=1 SV=2
176.1	sp|O35728|CP4AE_MOUSE	218	59252	10 (9)	8 (7)	0.54	Cytochrome P450 4A14 OS=Mus musculus GN=Cyp4a14 PE=1 SV=1
176.2	sp|Q91WL5|CP4CA_MOUSE	112	58711	3 (3)	2 (2)	0.12	Cytochrome P450 4A12A OS=Mus musculus GN=Cyp4a12a PE=1 SV=2
177	sp|Q8BH95|ECHM_MOUSE	217	31853	7 (7)	6 (6)	0.81	Enoyl-CoA hydratase, mitochondrial OS=Mus musculus GN=Echs1 PE=1 SV=1
178	sp|P68040|RACK1_MOUSE	217	35511	11 (9)	8 (6)	0.87	Receptor of activated protein C kinase 1 OS=Mus musculus GN=Rack1 PE=1 SV=3
179	sp|Q8VCN5|CGL_MOUSE	217	44166	11 (9)	9 (8)	0.78	Cystathionine gamma-lyase OS=Mus musculus GN=Cth PE=1 SV=1
180	sp|Q571F8|GLSL_MOUSE	213	67178	12 (11)	10 (10)	0.61	Glutaminase liver isoform, mitochondrial OS=Mus musculus GN=Gls2 PE=1 SV=2
181	tr|Q3V235|Q3V235_MOUSE	213	33276	14 (13)	11 (10)	1.84	Prohibitin 2 OS=Mus musculus GN=Phb2 PE=1 SV=1
182	sp|Q6PB66|LPPRC_MOUSE	213	157770	12 (9)	11 (9)	0.2	Leucine-rich PPR motif-containing protein, mitochondrial OS=Mus musculus GN=Lrpprc PE=1 SV=2
183	tr|Q3U4Z7|Q3U4Z7_MOUSE	212	142225	10 (10)	10 (10)	0.26	High density lipoprotein (HDL) binding protein, isoform CRA_d OS=Mus musculus GN=Hdlbp PE=1 SV=1
184	sp|Q3UQ44|IQGA2_MOUSE	212	181100	10 (10)	10 (10)	0.2	Ras GTPase-activating-like protein IQGAP2 OS=Mus musculus GN=Iqgap2 PE=1 SV=2
185	sp|Q9D2G2|ODO2_MOUSE	210	49306	9 (9)	7 (7)	0.57	Dihydrolipoyllysine-residue succinyltransferase component of 2-oxoglutarate dehydrogenase complex, mitochondrial OS=Mus musculus GN=Dlst PE=1 SV=1
186	sp|P28665|MUG1_MOUSE	209	166618	12 (10)	11 (10)	0.21	Murinoglobulin-1 OS=Mus musculus GN=Mug1 PE=1 SV=3
187	tr|Q8C2Q8|Q8C2Q8_MOUSE	207	30294	13 (8)	9 (6)	1.07	ATP synthase subunit gamma OS=Mus musculus GN=Atp5c1 PE=1 SV=1
188	tr|Q3UEN6|Q3UEN6_MOUSE	207	34970	9 (9)	7 (7)	0.89	Serine dehydratase OS=Mus musculus GN=Sds PE=1 SV=1
189	tr|A0A0U1RP47|A0A0U1RP47_MOUSE	203	99396	12 (9)	8 (7)	0.34	E3 ubiquitin-protein ligase CBL OS=Mus musculus GN=Cbl PE=1 SV=1
190	tr|Q3UI56|Q3UI56_MOUSE	202	76321	17 (12)	17 (12)	0.66	Annexin OS=Mus musculus GN=Anxa6 PE=2 SV=1
191	tr|H3BJ51|H3BJ51_MOUSE	199	61471	5 (5)	5 (5)	0.3	All-trans-retinol 13,14-reductase OS=Mus musculus GN=Retsat PE=1 SV=1
192	tr|Q3TDN8|Q3TDN8_MOUSE	199	33912	7 (7)	4 (4)	0.45	Uncharacterized protein OS=Mus musculus GN=Bphl PE=2 SV=1
193	sp|Q9JKR6|HYOU1_MOUSE	198	111340	10 (6)	9 (5)	0.19	Hypoxia up-regulated protein 1 OS=Mus musculus GN=Hyou1 PE=1 SV=1
194	tr|Q8C1E4|Q8C1E4_MOUSE	197	86946	9 (9)	8 (8)	0.34	Uncharacterized protein OS=Mus musculus GN=Sec23a PE=2 SV=1
195	tr|Q3T9U9|Q3T9U9_MOUSE	197	46378	13 (9)	11 (9)	0.86	Uncharacterized protein OS=Mus musculus GN=Rpl3 PE=2 SV=1
196	tr|D3Z1F5|D3Z1F5_MOUSE	196	25542	8 (6)	6 (4)	1.09	Glycine N-acyltransferase-like protein Keg1 (Fragment) OS=Mus musculus GN=Keg1 PE=1 SV=1
197	sp|O88451|RDH7_MOUSE	195	36093	17 (13)	13 (11)	1.87	Retinol dehydrogenase 7 OS=Mus musculus GN=Rdh7 PE=1 SV=1
198.1	sp|P30115|GSTA3_MOUSE	195	25401	17 (13)	8 (6)	1.1	Glutathione S-transferase A3 OS=Mus musculus GN=Gsta3 PE=1 SV=2
198.2	sp|P24472|GSTA4_MOUSE	51	25547	4 (3)	3 (2)	0.28	Glutathione S-transferase A4 OS=Mus musculus GN=Gsta4 PE=1 SV=3
199	tr|A2AFW6|A2AFW6_MOUSE	195	32951	3 (3)	1 (1)	0.33	Mitochondrial carrier homolog 2 OS=Mus musculus GN=Mtch2 PE=1 SV=1
200	tr|B2CY77|B2CY77_MOUSE	192	32944	5 (5)	5 (5)	0.62	Laminin receptor (Fragment) OS=Mus musculus GN=Rpsa PE=2 SV=1
201.1	tr|A2A513|A2A513_MOUSE	191	57178	4 (4)	4 (4)	0.25	Keratin, type I cytoskeletal 10 OS=Mus musculus GN=Krt10 PE=1 SV=1
201.2	sp|Q61781|K1C14_MOUSE	57	53176	2 (2)	2 (2)	0.13	Keratin, type I cytoskeletal 14 OS=Mus musculus GN=Krt14 PE=1 SV=2
202	tr|Q3UEH8|Q3UEH8_MOUSE	190	52266	15 (13)	11 (11)	1.08	Uncharacterized protein OS=Mus musculus GN=Pah PE=2 SV=1
203	sp|Q9EQF5|DPYS_MOUSE	190	57202	7 (7)	6 (6)	0.48	Dihydropyrimidinase OS=Mus musculus GN=Dpys PE=1 SV=2
204	tr|Q3U7Z6|Q3U7Z6_MOUSE	190	28928	7 (7)	5 (5)	1.14	Phosphoglycerate mutase OS=Mus musculus GN=Pgam1 PE=1 SV=1
205	tr|Q0QEZ4|Q0QEZ4_MOUSE	190	27989	11 (9)	9 (8)	1.46	Succinate dehydrogenase [ubiquinone] iron-sulfur subunit, mitochondrial (Fragment) OS=Mus musculus GN=Sdhb PE=2 SV=1
206	tr|A0JLV3|A0JLV3_MOUSE	188	13570	7 (7)	4 (4)	2.08	Histone H2B (Fragment) OS=Mus musculus GN=Hist1h2bj PE=2 SV=1
207	tr|Q3UXD9|Q3UXD9_MOUSE	187	28362	6 (6)	6 (6)	0.94	Peroxisomal trans-2-enoyl-CoA reductase OS=Mus musculus GN=Pecr PE=1 SV=1
208	sp|Q7TNG8|LDHD_MOUSE	187	52499	8 (7)	8 (7)	0.53	Probable D-lactate dehydrogenase, mitochondrial OS=Mus musculus GN=Ldhd PE=1 SV=1
209	tr|Q3UGT1|Q3UGT1_MOUSE	187	88937	8 (8)	6 (6)	0.29	Uncharacterized protein OS=Mus musculus GN=Cpt1a PE=2 SV=1
210	tr|Q3V2F7|Q3V2F7_MOUSE	187	14294	10 (8)	7 (6)	3.45	Fatty acid binding protein 1, liver OS=Mus musculus GN=Fabp1 PE=1 SV=1
211.1	tr|A0A1L1SV25|A0A1L1SV25_MOUSE	186	107498	7 (7)	7 (7)	0.23	Alpha-actinin-4 OS=Mus musculus GN=Actn4 PE=1 SV=1
211.2	sp|Q7TPR4|ACTN1_MOUSE	67	103631	5 (4)	5 (4)	0.13	Alpha-actinin-1 OS=Mus musculus GN=Actn1 PE=1 SV=1
212	tr|Q6GT24|Q6GT24_MOUSE	185	24925	5 (5)	4 (4)	0.87	Peroxiredoxin-6 OS=Mus musculus GN=Prdx6 PE=1 SV=1
213.1	sp|Q80X90|FLNB_MOUSE	184	280103	9 (9)	8 (8)	0.11	Filamin-B OS=Mus musculus GN=Flnb PE=1 SV=3
213.2	sp|Q8BTM8|FLNA_MOUSE	51	283897	3 (3)	3 (3)	0.03	Filamin-A OS=Mus musculus GN=Flna PE=1 SV=5
214	tr|Q3U548|Q3U548_MOUSE	184	55852	8 (7)	6 (5)	0.41	Uncharacterized protein OS=Mus musculus GN=Ugp2 PE=2 SV=1
215	tr|Q3TGR3|Q3TGR3_MOUSE	184	76764	10 (10)	9 (9)	0.52	Uncharacterized protein OS=Mus musculus GN=Ncl PE=2 SV=1
216	tr|B0LAA8|B0LAA8_MOUSE	183	16460	11 (11)	5 (5)	3.48	Nucleoside diphosphate kinase (Fragment) OS=Mus musculus GN=Nme2 PE=2 SV=1
217	sp|Q91W43|GCSP_MOUSE	183	114564	10 (8)	8 (6)	0.22	Glycine dehydrogenase (decarboxylating), mitochondrial OS=Mus musculus GN=Gldc PE=1 SV=1
218	tr|E9Q035|E9Q035_MOUSE	181	109894	8 (8)	8 (8)	0.26	Predicted gene 20425 OS=Mus musculus GN=Gm20425 PE=4 SV=1
219	sp|Q3UPL0|SC31A_MOUSE	179	134512	7 (6)	6 (5)	0.15	Protein transport protein Sec31A OS=Mus musculus GN=Sec31a PE=1 SV=2
220	tr|Q3UNF3|Q3UNF3_MOUSE	176	77453	12 (11)	8 (7)	0.39	Acyl-coenzyme A oxidase OS=Mus musculus GN=Acox2 PE=2 SV=1
221	tr|Q3UXQ6|Q3UXQ6_MOUSE	176	29773	8 (7)	7 (6)	0.89	40S ribosomal protein S4 OS=Mus musculus GN=Rps4x PE=2 SV=1
222.1	tr|Q3UC72|Q3UC72_MOUSE	176	57973	6 (5)	5 (5)	0.32	Rab GDP dissociation inhibitor (Fragment) OS=Mus musculus GN=Gdi2 PE=2 SV=1
222.2	sp|P50396|GDIA_MOUSE	107	51059	3 (3)	3 (3)	0.21	Rab GDP dissociation inhibitor alpha OS=Mus musculus GN=Gdi1 PE=1 SV=3
223	sp|Q8VCB3|GYS2_MOUSE	175	81618	9 (9)	8 (8)	0.43	Glycogen [starch] synthase, liver OS=Mus musculus GN=Gys2 PE=1 SV=2
224.1	tr|Q80X81|Q80X81_MOUSE	174	41900	11 (8)	8 (6)	0.84	Acetyl-Coenzyme A acetyltransferase 3 OS=Mus musculus GN=Acat3 PE=1 SV=1
224.2	sp|Q8CAY6|THIC_MOUSE	167	41727	10 (8)	6 (5)	0.84	Acetyl-CoA acetyltransferase, cytosolic OS=Mus musculus GN=Acat2 PE=1 SV=2
225	sp|Q99J08|S14L2_MOUSE	173	46727	10 (7)	7 (5)	0.51	SEC14-like protein 2 OS=Mus musculus GN=Sec14l2 PE=1 SV=1
226	tr|Q3TE63|Q3TE63_MOUSE	172	18104	9 (9)	6 (6)	2.31	Peptidyl-prolyl cis-trans isomerase OS=Mus musculus GN=Ppia PE=2 SV=1
227	tr|Q545Q2|Q545Q2_MOUSE	172	30589	6 (6)	3 (3)	0.51	Surfeit gene 4, isoform CRA_a OS=Mus musculus GN=Surf4 PE=1 SV=1
228	tr|Q7TND9|Q7TND9_MOUSE	171	53569	15 (12)	10 (7)	0.71	Dihydrolipoamide acetyltransferase component of pyruvate dehydrogenase complex OS=Mus musculus GN=Dbt PE=2 SV=1
229	sp|P48036|ANXA5_MOUSE	170	35787	9 (9)	5 (5)	0.7	Annexin A5 OS=Mus musculus GN=Anxa5 PE=1 SV=1
230	tr|B2RUH2|B2RUH2_MOUSE	170	104963	6 (5)	6 (5)	0.17	BTB (POZ) domain containing 11 OS=Mus musculus GN=Btbd11 PE=2 SV=1
231	sp|Q3UEG6|AGT2_MOUSE	170	57876	10 (8)	9 (7)	0.56	Alanine--glyoxylate aminotransferase 2, mitochondrial OS=Mus musculus GN=Agxt2 PE=1 SV=1
232	sp|Q99JR1|SFXN1_MOUSE	169	35911	7 (6)	6 (6)	0.7	Sideroflexin-1 OS=Mus musculus GN=Sfxn1 PE=1 SV=3
233	tr|Q3U711|Q3U711_MOUSE	169	46946	9 (8)	8 (7)	0.72	Perilipin OS=Mus musculus GN=Plin2 PE=2 SV=1
234	tr|Q3TP24|Q3TP24_MOUSE	169	79704	10 (9)	10 (9)	0.44	Uncharacterized protein OS=Mus musculus GN=Ltf PE=2 SV=1
235	tr|Q3TMB3|Q3TMB3_MOUSE	168	40912	7 (6)	5 (5)	0.47	Uncharacterized protein OS=Mus musculus GN=Fdps PE=2 SV=1
236	sp|P35700|PRDX1_MOUSE	167	22390	12 (9)	8 (6)	2.05	Peroxiredoxin-1 OS=Mus musculus GN=Prdx1 PE=1 SV=1
237	sp|P01027|CO3_MOUSE	167	187905	9 (9)	8 (8)	0.17	Complement C3 OS=Mus musculus GN=C3 PE=1 SV=3
238.1	sp|Q8VCR2|DHB13_MOUSE	166	33779	5 (5)	5 (5)	0.6	17-beta-hydroxysteroid dehydrogenase 13 OS=Mus musculus GN=Hsd17b13 PE=1 SV=2
238.2	tr|A8Y5N4|A8Y5N4_MOUSE	151	29634	4 (4)	4 (4)	0.53	17-beta-hydroxysteroid dehydrogenase 13 OS=Mus musculus GN=Hsd17b13 PE=1 SV=1
239	tr|G3UXX3|G3UXX3_MOUSE	166	23627	7 (7)	7 (7)	1.53	Sepiapterin reductase OS=Mus musculus GN=Spr PE=1 SV=1
240	tr|Q7TQB3|Q7TQB3_MOUSE	165	75862	9 (9)	6 (6)	0.35	Solute carrier organic anion transporter family member OS=Mus musculus GN=Slco1a1 PE=2 SV=1
241	tr|Q3TJD0|Q3TJD0_MOUSE	163	52657	3 (3)	1 (1)	0.13	Uncharacterized protein OS=Mus musculus GN=Sec61a1 PE=2 SV=1
242	tr|Q5DTI2|Q5DTI2_MOUSE	161	118178	7 (7)	7 (7)	0.21	ATPase, Ca++ transporting, cardiac muscle, slow twitch 2, isoform CRA_b (Fragment) OS=Mus musculus GN=Atp2a2 PE=2 SV=1
243	tr|A0A140LHR8|A0A140LHR8_MOUSE	160	61444	8 (7)	8 (7)	0.44	Acyl-coenzyme A synthetase ACSM5, mitochondrial OS=Mus musculus GN=Acsm5 PE=1 SV=1
244	sp|Q91WN4|KMO_MOUSE	160	55066	9 (8)	8 (7)	0.5	Kynurenine 3-monooxygenase OS=Mus musculus GN=Kmo PE=1 SV=1
245	tr|Q8K156|Q8K156_MOUSE	160	51047	4 (4)	4 (4)	0.28	Gulonolactone (L-) oxidase OS=Mus musculus GN=Gulo PE=2 SV=1
246	tr|Q3THL7|Q3THL7_MOUSE	160	30852	5 (5)	4 (4)	0.67	Uncharacterized protein OS=Mus musculus GN=Vdac1 PE=2 SV=1
247	sp|P40936|INMT_MOUSE	159	30068	6 (5)	5 (4)	0.69	Indolethylamine N-methyltransferase OS=Mus musculus GN=Inmt PE=1 SV=1
248	sp|P05201|AATC_MOUSE	159	46504	11 (9)	9 (8)	0.73	Aspartate aminotransferase, cytoplasmic OS=Mus musculus GN=Got1 PE=1 SV=3
249	tr|Q3UCH0|Q3UCH0_MOUSE	158	33546	6 (5)	3 (3)	0.46	60S ribosomal protein L6 OS=Mus musculus GN=Rpl6 PE=1 SV=1
250	tr|E9PWY6|E9PWY6_MOUSE	158	41820	4 (3)	3 (2)	0.26	2-amino-3-ketobutyrate coenzyme A ligase, mitochondrial OS=Mus musculus GN=Gcat PE=1 SV=1
251	tr|A0A140T8L1|A0A140T8L1_MOUSE	157	30583	4 (3)	4 (3)	0.36	Ribosomal protein L7A, pseudogene 3 OS=Mus musculus GN=Rpl7a-ps3 PE=4 SV=1
252	tr|Q3TXB1|Q3TXB1_MOUSE	156	26187	6 (6)	4 (4)	1.05	Uncharacterized protein OS=Mus musculus GN=C1qa PE=2 SV=1
253	sp|P05784|K1C18_MOUSE	155	47509	8 (6)	8 (6)	0.5	Keratin, type I cytoskeletal 18 OS=Mus musculus GN=Krt18 PE=1 SV=5
254	tr|Q3TIU7|Q3TIU7_MOUSE	154	80638	4 (4)	4 (4)	0.17	Uncharacterized protein OS=Mus musculus GN=Ndufs1 PE=2 SV=1
255	tr|A2AMW0|A2AMW0_MOUSE	154	29562	6 (4)	5 (3)	0.53	Capping protein (Actin filament) muscle Z-line, beta, isoform CRA_a OS=Mus musculus GN=Capzb PE=1 SV=1
256	sp|O88587|COMT_MOUSE	153	29695	6 (6)	5 (5)	0.89	Catechol O-methyltransferase OS=Mus musculus GN=Comt PE=1 SV=2
257	tr|Q8VED0|Q8VED0_MOUSE	153	83222	7 (7)	6 (6)	0.31	Mut protein OS=Mus musculus GN=Mut PE=2 SV=1
258	tr|Q3U6C7|Q3U6C7_MOUSE	152	50936	11 (7)	10 (6)	0.46	Succinate-CoA ligase subunit beta (Fragment) OS=Mus musculus GN=Sucla2 PE=2 SV=1
259	tr|A8IP69|A8IP69_MOUSE	151	28456	6 (4)	5 (3)	0.56	14-3-3 protein gamma subtype OS=Mus musculus GN=Ywhag PE=1 SV=1
260	sp|Q921X9|PDIA5_MOUSE	150	59970	4 (4)	4 (4)	0.24	Protein disulfide-isomerase A5 OS=Mus musculus GN=Pdia5 PE=1 SV=1
261	tr|Q3U630|Q3U630_MOUSE	149	84256	9 (9)	7 (7)	0.41	Uncharacterized protein OS=Mus musculus GN=Tars PE=2 SV=1
262	sp|Q9QZE5|COPG1_MOUSE	149	98705	9 (8)	8 (7)	0.26	Coatomer subunit gamma-1 OS=Mus musculus GN=Copg1 PE=1 SV=1
263	tr|A0A0J9YUI8|A0A0J9YUI8_MOUSE	147	69134	6 (6)	5 (5)	0.26	Glucokinase regulatory protein OS=Mus musculus GN=Gckr PE=1 SV=1
264	sp|Q8QZR5|ALAT1_MOUSE	147	55905	6 (6)	4 (4)	0.33	Alanine aminotransferase 1 OS=Mus musculus GN=Gpt PE=1 SV=3
265	sp|Q04447|KCRB_MOUSE	146	42971	4 (4)	2 (2)	0.25	Creatine kinase B-type OS=Mus musculus GN=Ckb PE=1 SV=1
266.1	tr|Q0PD67|Q0PD67_MOUSE	146	22891	8 (5)	6 (4)	0.98	RAB1, member RAS oncogene family, isoform CRA_a OS=Mus musculus GN=Rab1a PE=1 SV=1
266.2	sp|Q9D1G1|RAB1B_MOUSE	105	22344	6 (5)	5 (4)	1.01	Ras-related protein Rab-1B OS=Mus musculus GN=Rab1b PE=1 SV=1
266.3	tr|Q50HW9|Q50HW9_MOUSE	91	22059	2 (2)	2 (2)	0.33	RAB14 protein variant OS=Mus musculus GN=Rab14 PE=2 SV=1
266.4	sp|P61028|RAB8B_MOUSE	70	23759	3 (2)	3 (2)	0.3	Ras-related protein Rab-8B OS=Mus musculus GN=Rab8b PE=1 SV=1
266.5	sp|Q91V41|RAB14_MOUSE	53	24110	3 (3)	3 (3)	0.48	Ras-related protein Rab-14 OS=Mus musculus GN=Rab14 PE=1 SV=3
266.6	sp|P61027|RAB10_MOUSE	52	22755	3 (2)	3 (2)	0.32	Ras-related protein Rab-10 OS=Mus musculus GN=Rab10 PE=1 SV=1
266.7	sp|P55258|RAB8A_MOUSE	39	23824	3 (2)	3 (2)	0.3	Ras-related protein Rab-8A OS=Mus musculus GN=Rab8a PE=1 SV=2
267	tr|Q7TMY2|Q7TMY2_MOUSE	146	48304	5 (5)	5 (5)	0.39	Acyl-Coenzyme A dehydrogenase, short/branched chain OS=Mus musculus GN=Acadsb PE=2 SV=1
268	tr|Q3U8F5|Q3U8F5_MOUSE	146	53233	4 (4)	3 (3)	0.27	Uncharacterized protein OS=Mus musculus GN=Psmd12 PE=2 SV=1
269	tr|Q3TGE1|Q3TGE1_MOUSE	146	47825	5 (4)	5 (4)	0.31	Uncharacterized protein OS=Mus musculus GN=Actr3 PE=2 SV=1
270	tr|A0A1B0GS58|A0A1B0GS58_MOUSE	146	42191	2 (2)	1 (1)	0.16	Glutaredoxin-3 OS=Mus musculus GN=Glrx3 PE=1 SV=1
271	sp|Q9WVD5|ORNT1_MOUSE	146	33315	5 (5)	4 (4)	0.46	Mitochondrial ornithine transporter 1 OS=Mus musculus GN=Slc25a15 PE=1 SV=1
272	tr|Q543J0|Q543J0_MOUSE	145	35245	8 (6)	8 (6)	0.71	Uricase OS=Mus musculus GN=Uox PE=1 SV=1
273	tr|E9QN99|E9QN99_MOUSE	145	22551	5 (5)	5 (5)	1	Protein ABHD14B OS=Mus musculus GN=Abhd14b PE=1 SV=1
274	sp|Q99PG0|AAAD_MOUSE	145	45392	9 (8)	8 (7)	0.75	Arylacetamide deacetylase OS=Mus musculus GN=Aadac PE=1 SV=3
275	tr|A0A0B4J1E7|A0A0B4J1E7_MOUSE	144	68559	2 (2)	1 (1)	0.1	Importin subunit alpha-3 OS=Mus musculus GN=Kpna4 PE=1 SV=1
276	tr|Q3TXE5|Q3TXE5_MOUSE	144	67617	12 (9)	9 (7)	0.53	Uncharacterized protein OS=Mus musculus GN=Canx PE=2 SV=1
277.1	sp|Q91X77|CY250_MOUSE	143	56527	9 (9)	8 (8)	0.57	Cytochrome P450 2C50 OS=Mus musculus GN=Cyp2c50 PE=1 SV=2
277.2	sp|Q64458|CP2CT_MOUSE	133	56364	10 (9)	7 (6)	0.49	Cytochrome P450 2C29 OS=Mus musculus GN=Cyp2c29 PE=1 SV=2
277.3	sp|Q6XVG2|CP254_MOUSE	95	56563	9 (8)	7 (7)	0.49	Cytochrome P450 2C54 OS=Mus musculus GN=Cyp2c54 PE=1 SV=1
278	tr|Q497E9|Q497E9_MOUSE	143	24475	7 (7)	6 (6)	1.16	40S ribosomal protein S8 OS=Mus musculus GN=Rps8 PE=1 SV=1
279	tr|Q5SX50|Q5SX50_MOUSE	142	15119	8 (6)	7 (6)	2.38	Profilin OS=Mus musculus GN=Pfn1 PE=1 SV=1
280	tr|J3QNY6|J3QNY6_MOUSE	142	147734	9 (8)	9 (8)	0.19	Bile salt export pump OS=Mus musculus GN=Abcb11 PE=1 SV=1
281	tr|Q3U7H9|Q3U7H9_MOUSE	141	21983	7 (6)	5 (4)	0.76	Uncharacterized protein (Fragment) OS=Mus musculus GN=Prdx5 PE=2 SV=1
282	sp|Q9JHW2|NIT2_MOUSE	141	30825	5 (5)	5 (5)	0.67	Omega-amidase NIT2 OS=Mus musculus GN=Nit2 PE=1 SV=1
283	tr|Q5EBQ6|Q5EBQ6_MOUSE	141	21982	7 (6)	5 (4)	0.76	MCG10266, isoform CRA_a OS=Mus musculus GN=Rpl9 PE=1 SV=1
284	tr|F8WGL3|F8WGL3_MOUSE	141	25074	6 (5)	3 (2)	0.46	Cofilin-1 OS=Mus musculus GN=Cfl1 PE=1 SV=1
285	tr|Q6ZPS9|Q6ZPS9_MOUSE	140	100946	4 (4)	3 (3)	0.14	MKIAA1375 protein (Fragment) OS=Mus musculus GN=Pdcd6ip PE=2 SV=1
286	sp|Q99PT1|GDIR1_MOUSE	140	23450	4 (4)	4 (4)	0.71	Rho GDP-dissociation inhibitor 1 OS=Mus musculus GN=Arhgdia PE=1 SV=3
287	sp|Q9JHU4|DYHC1_MOUSE	138	534447	7 (5)	7 (5)	0.03	Cytoplasmic dynein 1 heavy chain 1 OS=Mus musculus GN=Dync1h1 PE=1 SV=2
288	sp|P85094|ISC2A_MOUSE	138	22745	7 (7)	5 (5)	0.99	Isochorismatase domain-containing protein 2A OS=Mus musculus GN=Isoc2a PE=1 SV=1
289	sp|Q9CZU6|CISY_MOUSE	137	51988	6 (6)	5 (5)	0.36	Citrate synthase, mitochondrial OS=Mus musculus GN=Cs PE=1 SV=1
290	tr|Q3TR93|Q3TR93_MOUSE	137	31608	4 (4)	1 (1)	0.22	Uncharacterized protein OS=Mus musculus GN=Decr2 PE=2 SV=1
291	tr|Q3UJW9|Q3UJW9_MOUSE	136	36820	5 (5)	4 (4)	0.54	Uncharacterized protein OS=Mus musculus GN=Akr1a1 PE=2 SV=1
292	sp|Q8BJ64|CHDH_MOUSE	135	67057	8 (7)	7 (6)	0.4	Choline dehydrogenase, mitochondrial OS=Mus musculus GN=Chdh PE=1 SV=1
293	tr|Q3U3J1|Q3U3J1_MOUSE	135	51026	6 (6)	5 (5)	0.46	2-oxoisovalerate dehydrogenase subunit alpha, mitochondrial OS=Mus musculus GN=Bckdha PE=1 SV=1
294	tr|B2RUJ7|B2RUJ7_MOUSE	135	148576	7 (6)	5 (5)	0.14	Xanthine dehydrogenase OS=Mus musculus GN=Xdh PE=2 SV=1
295	tr|Q6P5I3|Q6P5I3_MOUSE	134	40320	9 (8)	7 (7)	0.74	S-(hydroxymethyl)glutathione dehydrogenase OS=Mus musculus GN=Adh5 PE=1 SV=2
296	sp|Q91X34|BAAT_MOUSE	133	46737	3 (3)	2 (2)	0.23	Bile acid-CoA:amino acid N-acyltransferase OS=Mus musculus GN=Baat PE=1 SV=1
297	sp|Q9QYG0|NDRG2_MOUSE	133	41105	8 (7)	6 (5)	0.47	Protein NDRG2 OS=Mus musculus GN=Ndrg2 PE=1 SV=1
298	sp|Q8BMA6|SRP68_MOUSE	133	71044	5 (5)	3 (3)	0.25	Signal recognition particle subunit SRP68 OS=Mus musculus GN=Srp68 PE=1 SV=2
299	tr|Q3TQP6|Q3TQP6_MOUSE	133	62126	7 (6)	5 (4)	0.29	Malic enzyme OS=Mus musculus GN=Me1 PE=1 SV=1
300	sp|P35576|G6PC_MOUSE	132	40960	3 (3)	1 (1)	0.17	Glucose-6-phosphatase OS=Mus musculus GN=G6pc PE=1 SV=2
301	sp|Q8R086|SUOX_MOUSE	131	61231	7 (6)	7 (6)	0.37	Sulfite oxidase, mitochondrial OS=Mus musculus GN=Suox PE=1 SV=2
302	sp|Q9DC50|OCTC_MOUSE	130	71131	7 (6)	7 (6)	0.31	Peroxisomal carnitine O-octanoyltransferase OS=Mus musculus GN=Crot PE=1 SV=1
303	tr|B2RS41|B2RS41_MOUSE	130	56503	8 (6)	8 (6)	0.4	Aldhehyde dehydrogenase family 5, subfamily A1 OS=Mus musculus GN=Aldh5a1 PE=1 SV=1
304	tr|Q3U8X1|Q3U8X1_MOUSE	130	38078	2 (2)	1 (1)	0.18	Eukaryotic translation initiation factor 3 subunit F OS=Mus musculus GN=Eif3f PE=2 SV=1
305	tr|Q4FZK2|Q4FZK2_MOUSE	130	50371	7 (7)	6 (6)	0.56	Eukaryotic translation elongation factor 1 gamma OS=Mus musculus GN=Eef1g PE=1 SV=1
306	sp|Q9CR57|RL14_MOUSE	130	23663	5 (4)	4 (3)	0.49	60S ribosomal protein L14 OS=Mus musculus GN=Rpl14 PE=1 SV=3
307	tr|Q3UIB5|Q3UIB5_MOUSE	128	27937	6 (6)	5 (5)	0.96	Uncharacterized protein OS=Mus musculus GN=Dhrs4 PE=2 SV=1
308	tr|Q3TCJ7|Q3TCJ7_MOUSE	128	72574	5 (5)	4 (4)	0.25	Uncharacterized protein OS=Mus musculus GN=Samhd1 PE=2 SV=1
309	tr|Q58DZ3|Q58DZ3_MOUSE	127	12947	5 (5)	4 (4)	2.22	MCG20799 OS=Mus musculus GN=Rpl30 PE=1 SV=1
310	tr|Q3TJD4|Q3TJD4_MOUSE	127	29044	7 (6)	7 (6)	0.92	Uncharacterized protein OS=Mus musculus GN=Atp5f1 PE=2 SV=1
311	sp|P21614|VTDB_MOUSE	126	55162	5 (3)	4 (2)	0.19	Vitamin D-binding protein OS=Mus musculus GN=Gc PE=1 SV=2
312	sp|Q9DB77|QCR2_MOUSE	126	48262	6 (5)	6 (5)	0.39	Cytochrome b-c1 complex subunit 2, mitochondrial OS=Mus musculus GN=Uqcrc2 PE=1 SV=1
313	tr|A0A068BEQ2|A0A068BEQ2_MOUSE	125	26799	2 (2)	2 (2)	0.26	H2-K region expressed gene 6, isoform CRA_a OS=Mus musculus GN=H2-Ke6 PE=2 SV=1
314	tr|A0A0J9YTY6|A0A0J9YTY6_MOUSE	125	21109	2 (2)	2 (2)	0.34	Mitochondrial glutamate carrier 1 (Fragment) OS=Mus musculus GN=Slc25a22 PE=1 SV=2
315	tr|Q3THU8|Q3THU8_MOUSE	125	40044	10 (10)	9 (9)	1.04	Uncharacterized protein OS=Mus musculus GN=Slc25a3 PE=2 SV=1
316	tr|A2AL78|A2AL78_MOUSE	125	25918	2 (2)	1 (1)	0.27	Aspartyl/asparaginyl beta-hydroxylase OS=Mus musculus GN=Asph PE=1 SV=1
317	sp|Q8CIE6|COPA_MOUSE	124	139997	6 (4)	5 (4)	0.1	Coatomer subunit alpha OS=Mus musculus GN=Copa PE=1 SV=2
318	tr|Q3TJL8|Q3TJL8_MOUSE	124	49039	6 (5)	6 (5)	0.38	Uncharacterized protein OS=Mus musculus GN=Pdia6 PE=2 SV=1
319	tr|Q5YLW3|Q5YLW3_MOUSE	124	26828	11 (7)	10 (6)	1.27	Ribosomal protein S3 OS=Mus musculus GN=Rps3 PE=1 SV=1
320	sp|Q8BFR5|EFTU_MOUSE	122	49876	6 (6)	6 (6)	0.47	Elongation factor Tu, mitochondrial OS=Mus musculus GN=Tufm PE=1 SV=1
321	tr|Q3THW7|Q3THW7_MOUSE	122	39950	2 (2)	2 (2)	0.17	Eukaryotic translation initiation factor 3 subunit H OS=Mus musculus GN=Eif3h PE=2 SV=1
322	tr|D3YYM6|D3YYM6_MOUSE	122	20572	4 (4)	1 (1)	0.35	40S ribosomal protein S5 (Fragment) OS=Mus musculus GN=Rps5 PE=1 SV=1
323	sp|Q9D172|ES1_MOUSE	121	28415	5 (5)	4 (4)	0.74	ES1 protein homolog, mitochondrial OS=Mus musculus GN=D10Jhu81e PE=1 SV=1
324	sp|Q9WTP7|KAD3_MOUSE	120	25467	7 (5)	7 (5)	0.85	GTP:AMP phosphotransferase AK3, mitochondrial OS=Mus musculus GN=Ak3 PE=1 SV=3
325	tr|Q5D073|Q5D073_MOUSE	120	22096	3 (3)	2 (2)	0.53	Peroxisomal membrane protein 2 OS=Mus musculus GN=Pxmp2 PE=1 SV=1
326	tr|Q3TQC7|Q3TQC7_MOUSE	120	50262	3 (3)	2 (2)	0.14	Ectonucleoside triphosphate diphosphohydrolase 5 OS=Mus musculus GN=Entpd5 PE=1 SV=1
327	tr|Q3TVU9|Q3TVU9_MOUSE	120	34484	5 (5)	5 (5)	0.58	Uncharacterized protein OS=Mus musculus GN=Dhrs1 PE=2 SV=1
328	tr|Q3UAG2|Q3UAG2_MOUSE	119	53725	6 (4)	6 (4)	0.27	6-phosphogluconate dehydrogenase, decarboxylating OS=Mus musculus GN=Pgd PE=2 SV=1
329	tr|Q0VG22|Q0VG22_MOUSE	119	33330	5 (4)	5 (4)	0.46	START domain containing 10 OS=Mus musculus GN=Stard10 PE=1 SV=1
330	tr|Q56A15|Q56A15_MOUSE	118	11712	6 (6)	5 (5)	2.6	Cytochrome c OS=Mus musculus GN=Cycs PE=1 SV=1
331.1	sp|Q8QZR3|EST2A_MOUSE	117	62356	5 (5)	5 (5)	0.29	Pyrethroid hydrolase Ces2a OS=Mus musculus GN=Ces2a PE=1 SV=1
331.2	sp|Q8BK48|EST2E_MOUSE	95	62676	4 (4)	4 (4)	0.23	Pyrethroid hydrolase Ces2e OS=Mus musculus GN=Ces2e PE=1 SV=1
332	sp|O35114|SCRB2_MOUSE	117	54466	3 (3)	2 (2)	0.19	Lysosome membrane protein 2 OS=Mus musculus GN=Scarb2 PE=1 SV=3
333	sp|P63101|1433Z_MOUSE	117	27925	6 (4)	5 (4)	0.57	14-3-3 protein zeta/delta OS=Mus musculus GN=Ywhaz PE=1 SV=1
334	tr|Q8CBG6|Q8CBG6_MOUSE	117	22820	3 (3)	2 (2)	0.51	6-phosphogluconolactonase OS=Mus musculus GN=Pgls PE=1 SV=1
335	tr|A0A0R4J0Z1|A0A0R4J0Z1_MOUSE	117	72667	6 (5)	6 (5)	0.25	Protein disulfide-isomerase A4 OS=Mus musculus GN=Pdia4 PE=1 SV=1
336	sp|Q9DCU9|HOGA1_MOUSE	116	34964	7 (5)	6 (5)	0.57	4-hydroxy-2-oxoglutarate aldolase, mitochondrial OS=Mus musculus GN=Hoga1 PE=1 SV=1
337	sp|A2ATU0|DHTK1_MOUSE	116	103470	6 (5)	5 (4)	0.17	Probable 2-oxoglutarate dehydrogenase E1 component DHKTD1, mitochondrial OS=Mus musculus GN=Dhtkd1 PE=1 SV=1
338	tr|F6ZHD8|F6ZHD8_MOUSE	116	80742	5 (5)	5 (5)	0.22	1,4-alpha-glucan-branching enzyme OS=Mus musculus GN=Gbe1 PE=1 SV=2
339	sp|P11983|TCPA_MOUSE	115	60867	5 (5)	5 (5)	0.3	T-complex protein 1 subunit alpha OS=Mus musculus GN=Tcp1 PE=1 SV=3
340	tr|Q3UEN9|Q3UEN9_MOUSE	115	43892	10 (9)	8 (7)	0.66	Serine--pyruvate aminotransferase OS=Mus musculus GN=Agxt PE=2 SV=1
341	tr|Q3UNI8|Q3UNI8_MOUSE	115	13183	8 (7)	5 (5)	4.01	D-dopachrome tautomerase OS=Mus musculus GN=Ddt PE=1 SV=1
342	tr|D3Z3G5|D3Z3G5_MOUSE	115	29871	3 (3)	3 (3)	0.37	Sulfotransferase OS=Mus musculus GN=Sult1a1 PE=1 SV=1
343	tr|Q3TIQ2|Q3TIQ2_MOUSE	115	17935	5 (5)	4 (4)	0.99	Uncharacterized protein OS=Mus musculus GN=Rpl12 PE=2 SV=1
344	tr|Q3UC51|Q3UC51_MOUSE	114	49239	3 (3)	3 (3)	0.21	Dolichyl-diphosphooligosaccharide--protein glycosyltransferase 48 kDa subunit OS=Mus musculus GN=Ddost PE=2 SV=1
345	tr|G5E850|G5E850_MOUSE	114	11135	2 (2)	2 (2)	0.72	Cytochrome b-5, isoform CRA_a OS=Mus musculus GN=Cyb5a PE=1 SV=1
346	tr|A0A1B0GSU0|A0A1B0GSU0_MOUSE	114	85543	3 (3)	3 (3)	0.12	Aldehyde dehydrogenase family 16 member A1 OS=Mus musculus GN=Aldh16a1 PE=1 SV=1
347	tr|Q3U6T2|Q3U6T2_MOUSE	114	47733	6 (6)	5 (5)	0.49	Uncharacterized protein OS=Mus musculus GN=Naga PE=2 SV=1
348	tr|Q3TJE8|Q3TJE8_MOUSE	113	55410	6 (6)	6 (6)	0.41	UDP-glucose 6-dehydrogenase OS=Mus musculus GN=Ugdh PE=2 SV=1
349	tr|Q3UBI6|Q3UBI6_MOUSE	112	31388	9 (6)	7 (5)	0.65	Uncharacterized protein OS=Mus musculus GN=Rpl7 PE=2 SV=1
350	tr|A0A0N4SUN2|A0A0N4SUN2_MOUSE	112	73825	7 (7)	4 (4)	0.3	Solute carrier organic anion transporter family member OS=Mus musculus GN=Slco1b2 PE=1 SV=1
351	sp|Q8BW75|AOFB_MOUSE	111	59034	15 (11)	12 (9)	0.82	Amine oxidase [flavin-containing] B OS=Mus musculus GN=Maob PE=1 SV=4
352	tr|A0A1S6GWK0|A0A1S6GWK0_MOUSE	111	86391	6 (6)	5 (5)	0.25	Uncharacterized protein OS=Mus musculus GN=Stt3a PE=2 SV=1
353	sp|Q91V76|CK054_MOUSE	109	35430	4 (4)	3 (3)	0.43	Ester hydrolase C11orf54 homolog OS=Mus musculus PE=1 SV=1
354	sp|Q9JIF7|COPB_MOUSE	108	108138	5 (5)	3 (3)	0.13	Coatomer subunit beta OS=Mus musculus GN=Copb1 PE=1 SV=1
355.1	sp|Q00898|A1AT5_MOUSE	107	46091	2 (2)	2 (2)	0.15	Alpha-1-antitrypsin 1-5 OS=Mus musculus GN=Serpina1e PE=1 SV=1
355.2	sp|P22599|A1AT2_MOUSE	84	46117	3 (3)	3 (3)	0.23	Alpha-1-antitrypsin 1-2 OS=Mus musculus GN=Serpina1b PE=1 SV=2
356	sp|Q99P30|NUDT7_MOUSE	107	27068	4 (4)	3 (3)	0.42	Peroxisomal coenzyme A diphosphatase NUDT7 OS=Mus musculus GN=Nudt7 PE=1 SV=2
357	tr|H3BJL6|H3BJL6_MOUSE	107	29956	8 (7)	6 (6)	1.09	S-formylglutathione hydrolase OS=Mus musculus GN=Esd PE=1 SV=1
358.1	tr|Q5SZA3|Q5SZA3_MOUSE	106	21254	6 (6)	6 (6)	1.42	Histone cluster 1, H1c OS=Mus musculus GN=Hist1h1c PE=1 SV=1
358.2	sp|P43274|H14_MOUSE	88	21964	5 (4)	5 (4)	0.76	Histone H1.4 OS=Mus musculus GN=Hist1h1e PE=1 SV=2
359	tr|Q8R2M5|Q8R2M5_MOUSE	106	60604	4 (4)	3 (3)	0.24	Iars2 protein (Fragment) OS=Mus musculus GN=Iars2 PE=2 SV=1
360	tr|Q5RKP4|Q5RKP4_MOUSE	105	68526	10 (7)	9 (6)	0.39	Dolichyl-diphosphooligosaccharide--protein glycosyltransferase subunit 1 (Fragment) OS=Mus musculus GN=Rpn1 PE=2 SV=1
361	sp|P11352|GPX1_MOUSE	105	22544	6 (5)	4 (4)	0.74	Glutathione peroxidase 1 OS=Mus musculus GN=Gpx1 PE=1 SV=2
362	tr|Q3TA21|Q3TA21_MOUSE	105	48764	3 (3)	2 (2)	0.14	Uncharacterized protein OS=Mus musculus GN=Cyp7b1 PE=2 SV=1
363	tr|Q8BGL3|Q8BGL3_MOUSE	104	33502	6 (6)	5 (5)	0.6	Sulfotransferase OS=Mus musculus GN=Sult2a8 PE=1 SV=1
364	tr|Q6ZWZ6|Q6ZWZ6_MOUSE	103	14905	2 (2)	1 (1)	0.51	40S ribosomal protein S12 OS=Mus musculus GN=Rps12 PE=1 SV=1
365	sp|Q9DD20|MET7B_MOUSE	103	28487	7 (5)	6 (4)	0.56	Methyltransferase-like protein 7B OS=Mus musculus GN=Mettl7b PE=1 SV=2
366	tr|Q3U6I5|Q3U6I5_MOUSE	102	26963	3 (3)	2 (2)	0.26	Uncharacterized protein OS=Mus musculus GN=C1qb PE=2 SV=1
367	tr|G3UY93|G3UY93_MOUSE	102	143085	5 (4)	5 (4)	0.09	Valine--tRNA ligase (Fragment) OS=Mus musculus GN=Vars PE=1 SV=1
368	tr|Q3U2G2|Q3U2G2_MOUSE	101	94948	5 (5)	5 (5)	0.18	Heat shock 70 kDa protein 4 OS=Mus musculus GN=Hspa4 PE=1 SV=1
369	tr|Q8C6E9|Q8C6E9_MOUSE	101	35186	2 (2)	2 (2)	0.2	Uncharacterized protein OS=Mus musculus GN=Pura PE=2 SV=1
370	tr|Q3TD51|Q3TD51_MOUSE	101	64778	3 (2)	3 (2)	0.1	Uncharacterized protein OS=Mus musculus GN=Picalm PE=2 SV=1
371	sp|Q80UU9|PGRC2_MOUSE	100	23434	1 (1)	1 (1)	0.14	Membrane-associated progesterone receptor component 2 OS=Mus musculus GN=Pgrmc2 PE=1 SV=2
372	tr|F6Q8D3|F6Q8D3_MOUSE	100	130683	5 (5)	4 (4)	0.13	Phospholipid-transporting ATPase OS=Mus musculus GN=Atp11c PE=1 SV=1
373	sp|Q9WTP6|KAD2_MOUSE	100	26737	4 (3)	4 (3)	0.42	Adenylate kinase 2, mitochondrial OS=Mus musculus GN=Ak2 PE=1 SV=5
374	tr|Q3TX45|Q3TX45_MOUSE	100	35873	9 (7)	8 (7)	0.86	Uncharacterized protein OS=Mus musculus GN=Apoe PE=2 SV=1
375	tr|Q5SUV8|Q5SUV8_MOUSE	100	54523	2 (2)	2 (2)	0.12	Uncharacterized protein OS=Mus musculus GN=Ddc PE=1 SV=1
376	sp|Q9CXW4|RL11_MOUSE	100	20468	5 (4)	4 (3)	0.84	60S ribosomal protein L11 OS=Mus musculus GN=Rpl11 PE=1 SV=4
377	tr|Q3UYY0|Q3UYY0_MOUSE	100	35604	7 (6)	6 (5)	0.71	Uncharacterized protein OS=Mus musculus GN=Cryz PE=2 SV=1
378	sp|Q05421|CP2E1_MOUSE	99	57168	11 (10)	9 (8)	0.56	Cytochrome P450 2E1 OS=Mus musculus GN=Cyp2e1 PE=1 SV=1
379	tr|Q3TEL5|Q3TEL5_MOUSE	99	45565	3 (3)	2 (2)	0.23	Lipase OS=Mus musculus GN=Lipa PE=2 SV=1
380	tr|A0A087WSI8|A0A087WSI8_MOUSE	99	61474	4 (4)	4 (4)	0.23	Acyl-CoA dehydrogenase family member 11 OS=Mus musculus GN=Acad11 PE=1 SV=2
381	sp|Q78IK2|USMG5_MOUSE	98	6434	2 (2)	2 (2)	1.42	Up-regulated during skeletal muscle growth protein 5 OS=Mus musculus GN=Usmg5 PE=1 SV=1
382	tr|Q3TRK9|Q3TRK9_MOUSE	98	53894	3 (3)	3 (3)	0.19	Uncharacterized protein OS=Mus musculus GN=Slc16a1 PE=2 SV=1
383	sp|P20108|PRDX3_MOUSE	97	28337	2 (2)	2 (2)	0.25	Thioredoxin-dependent peroxide reductase, mitochondrial OS=Mus musculus GN=Prdx3 PE=1 SV=1
384	tr|Q3TI61|Q3TI61_MOUSE	97	100996	3 (3)	3 (3)	0.1	Uncharacterized protein OS=Mus musculus GN=Psmd2 PE=2 SV=1
385	sp|Q99MR8|MCCA_MOUSE	97	79692	5 (5)	5 (5)	0.22	Methylcrotonoyl-CoA carboxylase subunit alpha, mitochondrial OS=Mus musculus GN=Mccc1 PE=1 SV=2
386	tr|A2BFF5|A2BFF5_MOUSE	97	71651	1 (1)	1 (1)	0.05	Cytoplasmic dynein 1 intermediate chain 2 OS=Mus musculus GN=Dync1i2 PE=1 SV=1
387	sp|Q8BMK4|CKAP4_MOUSE	96	63711	1 (1)	1 (1)	0.05	Cytoskeleton-associated protein 4 OS=Mus musculus GN=Ckap4 PE=1 SV=2
388	sp|Q9WUM5|SUCA_MOUSE	96	36474	8 (5)	7 (4)	0.42	Succinate--CoA ligase [ADP/GDP-forming] subunit alpha, mitochondrial OS=Mus musculus GN=Suclg1 PE=1 SV=4
389	tr|A0A1B0GSD0|A0A1B0GSD0_MOUSE	96	17488	2 (2)	1 (1)	0.42	Transthyretin (Fragment) OS=Mus musculus GN=Urah PE=1 SV=1
390	tr|Q3UKX8|Q3UKX8_MOUSE	96	92492	3 (3)	2 (2)	0.11	Uncharacterized protein OS=Mus musculus GN=Ap1g1 PE=2 SV=1
391	tr|Q2HZ94|Q2HZ94_MOUSE	94	167840	3 (3)	3 (3)	0.06	Macrophage mannose receptor 1 OS=Mus musculus GN=Mrc1 PE=1 SV=1
392	tr|Q3TFE8|Q3TFE8_MOUSE	94	98305	5 (5)	4 (4)	0.14	Uncharacterized protein OS=Mus musculus GN=Kpnb1 PE=2 SV=1
393	tr|A0A075DC90|A0A075DC90_MOUSE	94	26157	6 (5)	4 (3)	0.62	Cytochrome c oxidase subunit 2 OS=Mus musculus GN=COX2 PE=3 SV=1
394	sp|Q07797|LG3BP_MOUSE	94	65362	2 (2)	2 (2)	0.1	Galectin-3-binding protein OS=Mus musculus GN=Lgals3bp PE=1 SV=1
395	sp|Q6P3A8|ODBB_MOUSE	94	43651	4 (3)	4 (3)	0.24	2-oxoisovalerate dehydrogenase subunit beta, mitochondrial OS=Mus musculus GN=Bckdhb PE=1 SV=2
396	sp|Q9DCX2|ATP5H_MOUSE	93	18795	4 (4)	4 (4)	0.94	ATP synthase subunit d, mitochondrial OS=Mus musculus GN=Atp5h PE=1 SV=3
397	sp|Q8JZQ9|EIF3B_MOUSE	93	91712	3 (3)	3 (3)	0.11	Eukaryotic translation initiation factor 3 subunit B OS=Mus musculus GN=Eif3b PE=1 SV=1
398	sp|Q8VCZ9|HYPDH_MOUSE	93	51432	7 (6)	6 (5)	0.45	Hydroxyproline dehydrogenase OS=Mus musculus GN=Prodh2 PE=1 SV=1
399	tr|Q5D098|Q5D098_MOUSE	93	30083	3 (3)	2 (2)	0.37	Proteasome subunit beta type (Fragment) OS=Mus musculus GN=Psmb7 PE=2 SV=1
400	sp|P37040|NCPR_MOUSE	93	77394	10 (8)	10 (8)	0.39	NADPH--cytochrome P450 reductase OS=Mus musculus GN=Por PE=1 SV=2
401	tr|A2A5N2|A2A5N2_MOUSE	93	28183	5 (3)	5 (3)	0.4	Tyrosine 3-monooxygenase/tryptophan 5-monooxygenase activation protein, beta polypeptide OS=Mus musculus GN=Ywhab PE=2 SV=1
402.1	tr|A0A0N4SV00|A0A0N4SV00_MOUSE	93	55536	6 (4)	4 (3)	0.19	T-complex protein 1 subunit eta OS=Mus musculus GN=Cct7 PE=1 SV=1
402.2	tr|Q3UIJ0|Q3UIJ0_MOUSE	73	60123	6 (4)	4 (3)	0.17	Uncharacterized protein OS=Mus musculus GN=Cct7 PE=2 SV=1
403	tr|Q3U561|Q3U561_MOUSE	92	24971	3 (2)	3 (2)	0.29	Ribosomal protein OS=Mus musculus GN=Rpl10a PE=2 SV=1
404	tr|B1AQR8|B1AQR8_MOUSE	92	40281	5 (5)	5 (5)	0.48	Galectin OS=Mus musculus GN=Lgals9 PE=1 SV=1
405	tr|D3YVC1|D3YVC1_MOUSE	92	28868	5 (4)	5 (4)	0.55	40S ribosomal protein S2 (Fragment) OS=Mus musculus GN=Rps2 PE=1 SV=1
406	tr|A0A0N4SUN8|A0A0N4SUN8_MOUSE	92	17083	2 (2)	2 (2)	0.43	Plasminogen activator inhibitor 1 RNA-binding protein OS=Mus musculus GN=Serbp1 PE=1 SV=1
407	tr|A0A1L1STE6|A0A1L1STE6_MOUSE	92	41949	2 (2)	1 (1)	0.16	Isocitrate dehydrogenase [NAD] subunit, mitochondrial OS=Mus musculus GN=Idh3a PE=1 SV=1
408	sp|Q8JZU2|TXTP_MOUSE	91	34252	7 (4)	5 (3)	0.45	Tricarboxylate transport protein, mitochondrial OS=Mus musculus GN=Slc25a1 PE=1 SV=1
409	sp|Q8BL66|EEA1_MOUSE	91	161958	4 (3)	4 (3)	0.06	Early endosome antigen 1 OS=Mus musculus GN=Eea1 PE=1 SV=2
410	sp|Q9EP69|SAC1_MOUSE	90	67471	3 (3)	2 (2)	0.1	Phosphatidylinositide phosphatase SAC1 OS=Mus musculus GN=Sacm1l PE=1 SV=1
411	sp|P24527|LKHA4_MOUSE	90	69634	1 (1)	1 (1)	0.05	Leukotriene A-4 hydrolase OS=Mus musculus GN=Lta4h PE=1 SV=4
412	tr|A0A0R4J0I9|A0A0R4J0I9_MOUSE	90	523372	2 (2)	2 (2)	0.01	Low density lipoprotein receptor-related protein 1 OS=Mus musculus GN=Lrp1 PE=1 SV=1
413	tr|Q3U7K7|Q3U7K7_MOUSE	89	54320	3 (3)	1 (1)	0.19	E3 ubiquitin-protein ligase TRIM21 OS=Mus musculus GN=Trim21 PE=1 SV=1
414	tr|Q3U772|Q3U772_MOUSE	89	39178	2 (2)	1 (1)	0.18	Uncharacterized protein OS=Mus musculus GN=Csnk1a1 PE=2 SV=1
415	sp|Q99LC3|NDUAA_MOUSE	89	40863	2 (2)	1 (1)	0.08	NADH dehydrogenase [ubiquinone] 1 alpha subcomplex subunit 10, mitochondrial OS=Mus musculus GN=Ndufa10 PE=1 SV=1
416	tr|Q543K9|Q543K9_MOUSE	89	32527	3 (3)	3 (3)	0.34	Purine nucleoside phosphorylase OS=Mus musculus GN=Pnp PE=1 SV=1
417	tr|Q3V2D0|Q3V2D0_MOUSE	89	106980	4 (3)	4 (3)	0.09	Lon protease homolog, mitochondrial OS=Mus musculus GN=Lonp1 PE=2 SV=1
418	tr|Q3TGN5|Q3TGN5_MOUSE	88	77152	2 (2)	2 (2)	0.09	Uncharacterized protein OS=Mus musculus GN=Hnrnpu PE=2 SV=1
419	tr|F6UFB9|F6UFB9_MOUSE	88	6826	3 (3)	2 (2)	2.56	ADP-ribosylation factor 4 (Fragment) OS=Mus musculus GN=Arf4 PE=1 SV=1
420	sp|Q9Z2I0|LETM1_MOUSE	88	83621	3 (2)	3 (2)	0.08	Mitochondrial proton/calcium exchanger protein OS=Mus musculus GN=Letm1 PE=1 SV=1
421.1	tr|A1L333|A1L333_MOUSE	87	69750	3 (3)	3 (3)	0.15	DEAD (Asp-Glu-Ala-Asp) box polypeptide 5 OS=Mus musculus GN=Ddx5 PE=2 SV=1
421.2	sp|Q501J6|DDX17_MOUSE	58	72981	2 (2)	2 (2)	0.09	Probable ATP-dependent RNA helicase DDX17 OS=Mus musculus GN=Ddx17 PE=1 SV=1
422	tr|A0A140LHG8|A0A140LHG8_MOUSE	87	28780	2 (2)	1 (1)	0.25	Signal peptidase complex subunit 2 OS=Mus musculus GN=Spcs2 PE=1 SV=1
423	sp|Q9D0F3|LMAN1_MOUSE	87	58038	4 (3)	4 (3)	0.18	Protein ERGIC-53 OS=Mus musculus GN=Lman1 PE=1 SV=1
424	tr|Q3U5B1|Q3U5B1_MOUSE	86	34539	1 (1)	1 (1)	0.1	Uncharacterized protein OS=Mus musculus GN=Mavs PE=2 SV=1
425	tr|B2M1R6|B2M1R6_MOUSE	86	48760	2 (2)	2 (2)	0.14	Heterogeneous nuclear ribonucleoprotein K OS=Mus musculus GN=Hnrnpk PE=1 SV=1
426	tr|Q9DCY1|Q9DCY1_MOUSE	86	23699	4 (4)	4 (4)	0.69	Peptidyl-prolyl cis-trans isomerase OS=Mus musculus GN=Ppib PE=1 SV=1
427	sp|Q2VLH6|C163A_MOUSE	86	125062	4 (3)	4 (3)	0.08	Scavenger receptor cysteine-rich type 1 protein M130 OS=Mus musculus GN=Cd163 PE=1 SV=2
428	tr|Q9DD05|Q9DD05_MOUSE	85	36472	2 (2)	2 (2)	0.19	Delta-aminolevulinic acid dehydratase OS=Mus musculus GN=Alad PE=2 SV=1
429	sp|Q9D051|ODPB_MOUSE	84	39254	3 (3)	3 (3)	0.27	Pyruvate dehydrogenase E1 component subunit beta, mitochondrial OS=Mus musculus GN=Pdhb PE=1 SV=1
430	tr|A0A0R4J052|A0A0R4J052_MOUSE	84	29187	5 (4)	5 (4)	0.54	Hydroxyacylglutathione hydrolase, mitochondrial OS=Mus musculus GN=Hagh PE=1 SV=1
431	tr|Z4YK42|Z4YK42_MOUSE	84	45243	3 (3)	3 (3)	0.24	NAD kinase 2, mitochondrial OS=Mus musculus GN=Nadk2 PE=1 SV=1
432	sp|Q91WT9|CBS_MOUSE	83	62246	3 (3)	3 (3)	0.17	Cystathionine beta-synthase OS=Mus musculus GN=Cbs PE=1 SV=3
433	sp|Q9D8E6|RL4_MOUSE	82	47409	8 (7)	8 (7)	0.6	60S ribosomal protein L4 OS=Mus musculus GN=Rpl4 PE=1 SV=3
434	tr|Q3U5P8|Q3U5P8_MOUSE	82	30036	7 (3)	5 (3)	0.37	40S ribosomal protein S3a OS=Mus musculus GN=Rps3a1 PE=2 SV=1
435	tr|A0A140LIT2|A0A140LIT2_MOUSE	82	54926	3 (3)	3 (3)	0.19	7-dehydrocholesterol reductase OS=Mus musculus GN=Dhcr7 PE=1 SV=1
436	tr|Q3UFJ3|Q3UFJ3_MOUSE	82	43888	3 (2)	3 (2)	0.16	Pyruvate dehydrogenase E1 component subunit alpha OS=Mus musculus GN=Pdha1 PE=1 SV=1
437	sp|Q3TBD2|HMHA1_MOUSE	82	124194	1 (1)	1 (1)	0.03	Rho GTPase-activating protein 45 OS=Mus musculus GN=Arhgap45 PE=1 SV=2
438	sp|Q9DB29|IAH1_MOUSE	82	28412	2 (2)	2 (2)	0.25	Isoamyl acetate-hydrolyzing esterase 1 homolog OS=Mus musculus GN=Iah1 PE=1 SV=1
439	tr|A2ALV6|A2ALV6_MOUSE	81	105346	1 (1)	1 (1)	0.03	Expressed sequence AI314180 OS=Mus musculus GN=AI314180 PE=1 SV=1
440	tr|Q3U967|Q3U967_MOUSE	81	33589	1 (1)	1 (1)	0.1	Uncharacterized protein OS=Mus musculus GN=Cd47 PE=2 SV=1
441	sp|Q64727|VINC_MOUSE	81	117215	4 (3)	4 (3)	0.09	Vinculin OS=Mus musculus GN=Vcl PE=1 SV=4
442	tr|Q3TLX1|Q3TLX1_MOUSE	81	55714	2 (2)	2 (2)	0.12	Uncharacterized protein OS=Mus musculus GN=Nampt PE=2 SV=1
443	tr|A0A075B5P6|A0A075B5P6_MOUSE	81	50708	1 (1)	1 (1)	0.06	Ig mu chain C region (Fragment) OS=Mus musculus GN=Ighm PE=1 SV=1
444	tr|Q920X5|Q920X5_MOUSE	80	12086	2 (2)	2 (2)	0.65	Cathelicidin (Fragment) OS=Mus musculus GN=Cramp PE=3 SV=1
445	tr|Q3THC7|Q3THC7_MOUSE	80	28249	3 (2)	3 (2)	0.25	Uncharacterized protein OS=Mus musculus GN=Rpl8 PE=2 SV=1
446	tr|Q3UEE8|Q3UEE8_MOUSE	80	41260	1 (1)	1 (1)	0.08	Hydroxyacid oxidase 1, liver OS=Mus musculus GN=Hao1 PE=1 SV=1
447	sp|P67778|PHB_MOUSE	80	29859	5 (4)	5 (4)	0.53	Prohibitin OS=Mus musculus GN=Phb PE=1 SV=1
448	tr|A0A0R4IZZ5|A0A0R4IZZ5_MOUSE	80	61616	3 (3)	3 (3)	0.17	C-type lectin domain family 4 member F OS=Mus musculus GN=Clec4f PE=1 SV=1
449	tr|A1A4T2|A1A4T2_MOUSE	79	109791	6 (5)	5 (4)	0.16	Alpha glucosidase 2 alpha neutral subunit OS=Mus musculus GN=Ganab PE=2 SV=1
450	tr|Q3TKR5|Q3TKR5_MOUSE	79	34476	4 (4)	4 (4)	0.44	Ribosomal protein L5 OS=Mus musculus GN=Rpl5 PE=2 SV=1
451	tr|Q3UUF0|Q3UUF0_MOUSE	79	59366	6 (5)	5 (5)	0.31	Uncharacterized protein (Fragment) OS=Mus musculus GN=Faah PE=2 SV=1
452	sp|Q99J39|DCMC_MOUSE	79	55272	4 (3)	4 (3)	0.19	Malonyl-CoA decarboxylase, mitochondrial OS=Mus musculus GN=Mlycd PE=1 SV=1
453	sp|Q9Z1Z0|USO1_MOUSE	79	108000	2 (2)	2 (2)	0.06	General vesicular transport factor p115 OS=Mus musculus GN=Uso1 PE=1 SV=2
454	sp|Q9JKX3|TFR2_MOUSE	79	88689	1 (1)	1 (1)	0.04	Transferrin receptor protein 2 OS=Mus musculus GN=Tfr2 PE=1 SV=2
455	tr|Q5PR09|Q5PR09_MOUSE	78	15978	2 (2)	2 (2)	0.47	Ribosomal protein L32 OS=Mus musculus GN=Rpl32 PE=2 SV=1
456	tr|B1ASZ3|B1ASZ3_MOUSE	78	60593	4 (3)	4 (3)	0.17	Glycerol kinase OS=Mus musculus GN=Gk PE=1 SV=1
457	sp|Q8CHQ9|CMLO2_MOUSE	77	26578	4 (3)	4 (3)	0.43	Probable N-acetyltransferase CML2 OS=Mus musculus GN=Cml2 PE=1 SV=1
458	tr|E9PYT3|E9PYT3_MOUSE	77	60649	2 (2)	1 (1)	0.05	Atlastin-3 OS=Mus musculus GN=Atl3 PE=1 SV=1
459	sp|Q9CW42|MARC1_MOUSE	77	38525	4 (4)	4 (4)	0.39	Mitochondrial amidoxime-reducing component 1 OS=Mus musculus GN=Marc1 PE=1 SV=2
460	tr|A4FUS1|A4FUS1_MOUSE	77	16549	4 (4)	3 (3)	0.75	MCG123443 OS=Mus musculus GN=Rps16 PE=1 SV=1
461	sp|Q9JM62|REEP6_MOUSE	77	22361	2 (2)	2 (2)	0.32	Receptor expression-enhancing protein 6 OS=Mus musculus GN=Reep6 PE=1 SV=1
462	tr|B0V388|B0V388_MOUSE	77	20926	4 (2)	3 (2)	0.35	Novel member of the major urinary protein (Mup) gene family OS=Mus musculus GN=CU041261.1-001 PE=3 SV=1
463	tr|Q3UNS8|Q3UNS8_MOUSE	77	48695	3 (3)	3 (3)	0.22	Kynurenine/alpha-aminoadipate aminotransferase, mitochondrial OS=Mus musculus GN=Aadat PE=1 SV=1
464	tr|B2RXY7|B2RXY7_MOUSE	76	30907	4 (2)	4 (2)	0.23	Carbonyl reductase 1 OS=Mus musculus GN=Cbr1 PE=1 SV=1
465	sp|O88569|ROA2_MOUSE	74	37437	3 (3)	2 (2)	0.18	Heterogeneous nuclear ribonucleoproteins A2/B1 OS=Mus musculus GN=Hnrnpa2b1 PE=1 SV=2
466	tr|Q3TVP4|Q3TVP4_MOUSE	76	46013	1 (1)	1 (1)	0.07	Uncharacterized protein (Fragment) OS=Mus musculus GN=Cybb PE=2 SV=1
467	tr|Q9EP98|Q9EP98_MOUSE	75	138175	4 (4)	3 (3)	0.1	Receptor protein-tyrosine kinase OS=Mus musculus GN=Egfr PE=2 SV=1
468	sp|Q922Q1|MARC2_MOUSE	75	38797	5 (4)	4 (3)	0.28	Mitochondrial amidoxime reducing component 2 OS=Mus musculus GN=Marc2 PE=1 SV=1
469	tr|A0A0R4J1Y7|A0A0R4J1Y7_MOUSE	75	36631	1 (1)	1 (1)	0.09	Thioredoxin domain-containing protein 5 OS=Mus musculus GN=Txndc5 PE=1 SV=1
470	tr|Q5M9J8|Q5M9J8_MOUSE	74	15781	5 (4)	5 (4)	1.18	MCG13936 OS=Mus musculus GN=Rpl28 PE=1 SV=1
471	tr|Q3TJ39|Q3TJ39_MOUSE	74	23626	3 (2)	3 (2)	0.3	RAB5C, member RAS oncogene family, isoform CRA_a OS=Mus musculus GN=Rab5c PE=1 SV=1
472	tr|Q3TCE7|Q3TCE7_MOUSE	74	41864	1 (1)	1 (1)	0.08	Uncharacterized protein OS=Mus musculus GN=Arpc1b PE=2 SV=1
473	sp|Q9Z1P6|NDUA7_MOUSE	74	12625	2 (2)	1 (1)	0.27	NADH dehydrogenase [ubiquinone] 1 alpha subcomplex subunit 7 OS=Mus musculus GN=Ndufa7 PE=1 SV=3
474	tr|Q3UXC8|Q3UXC8_MOUSE	74	19899	2 (2)	1 (1)	0.37	Uncharacterized protein (Fragment) OS=Mus musculus GN=Hnrnpd PE=2 SV=1
475	tr|A0A1B0GR11|A0A1B0GR11_MOUSE	74	42638	5 (5)	5 (5)	0.45	Transaldolase OS=Mus musculus GN=Taldo1 PE=1 SV=1
476	tr|A0A0G2JE99|A0A0G2JE99_MOUSE	73	11850	1 (1)	1 (1)	0.29	Immunoglobulin lambda constant 1 (Fragment) OS=Mus musculus GN=Iglc1 PE=4 SV=1
477	sp|Q8VC28|AK1CD_MOUSE	73	37604	4 (4)	4 (4)	0.4	Aldo-keto reductase family 1 member C13 OS=Mus musculus GN=Akr1c13 PE=1 SV=2
478	sp|Q8BGT5|ALAT2_MOUSE	73	58705	6 (5)	6 (5)	0.31	Alanine aminotransferase 2 OS=Mus musculus GN=Gpt2 PE=1 SV=1
479	sp|Q8CHR6|DPYD_MOUSE	73	113177	5 (4)	5 (4)	0.12	Dihydropyrimidine dehydrogenase [NADP(+)] OS=Mus musculus GN=Dpyd PE=1 SV=1
480	tr|Q3UR26|Q3UR26_MOUSE	72	19344	2 (2)	2 (2)	0.38	Uncharacterized protein (Fragment) OS=Mus musculus GN=Hnrnph2 PE=2 SV=1
481	tr|Q3UMT7|Q3UMT7_MOUSE	72	64719	4 (3)	3 (3)	0.16	Uncharacterized protein OS=Mus musculus GN=Hnrnpl PE=2 SV=1
482	sp|Q61768|KINH_MOUSE	72	110225	2 (1)	2 (1)	0.03	Kinesin-1 heavy chain OS=Mus musculus GN=Kif5b PE=1 SV=3
483	sp|Q6A0A9|F120A_MOUSE	72	122766	1 (1)	1 (1)	0.03	Constitutive coactivator of PPAR-gamma-like protein 1 OS=Mus musculus GN=FAM120A PE=1 SV=2
484	sp|P80316|TCPE_MOUSE	72	60042	2 (2)	1 (1)	0.05	T-complex protein 1 subunit epsilon OS=Mus musculus GN=Cct5 PE=1 SV=1
485	tr|D3YUQ9|D3YUQ9_MOUSE	72	21465	3 (3)	3 (3)	0.55	Elongation factor 1-delta (Fragment) OS=Mus musculus GN=Eef1d PE=1 SV=8
486	tr|Q3TGQ3|Q3TGQ3_MOUSE	72	100698	3 (3)	3 (3)	0.1	Uncharacterized protein OS=Mus musculus GN=Ctnna1 PE=2 SV=1
487	tr|Q3T9L1|Q3T9L1_MOUSE	71	51669	2 (2)	2 (2)	0.13	Coronin OS=Mus musculus GN=Coro1a PE=2 SV=1
488	tr|A0JLT5|A0JLT5_MOUSE	71	134533	3 (3)	3 (3)	0.07	Mybbp1a protein (Fragment) OS=Mus musculus GN=Mybbp1a PE=2 SV=1
489	tr|Q3U9U5|Q3U9U5_MOUSE	71	28026	2 (2)	2 (2)	0.25	Uncharacterized protein OS=Mus musculus GN=Bcap31 PE=2 SV=1
490	tr|A0A0A6YVU8|A0A0A6YVU8_MOUSE	71	42406	1 (1)	1 (1)	0.08	MCG119397 OS=Mus musculus GN=Gm9774 PE=4 SV=1
491	tr|Q6ZQK2|Q6ZQK2_MOUSE	71	191991	3 (3)	3 (3)	0.05	MKIAA0051 protein (Fragment) OS=Mus musculus GN=Iqgap1 PE=2 SV=1
492	tr|Q3U344|Q3U344_MOUSE	71	20645	3 (2)	2 (2)	0.35	ADP-ribosylation factor 3 OS=Mus musculus GN=Arf3 PE=2 SV=1
493	tr|A0A087WRC0|A0A087WRC0_MOUSE	71	97951	2 (2)	2 (2)	0.07	Tripeptidyl-peptidase 2 OS=Mus musculus GN=Tpp2 PE=1 SV=1
494	tr|Q3U9V4|Q3U9V4_MOUSE	70	38048	2 (2)	2 (2)	0.18	Guanine nucleotide binding protein, beta 2, isoform CRA_a OS=Mus musculus GN=Gnb2 PE=1 SV=1
495	tr|E9Q3V2|E9Q3V2_MOUSE	70	21732	1 (1)	1 (1)	0.15	UDP-N-acetylglucosamine transporter (Fragment) OS=Mus musculus GN=Slc35a3 PE=1 SV=1
496	sp|Q9CRC0|VKOR1_MOUSE	70	18156	1 (1)	1 (1)	0.19	Vitamin K epoxide reductase complex subunit 1 OS=Mus musculus GN=Vkorc1 PE=1 SV=1
497	tr|A2A6U3|A2A6U3_MOUSE	70	64075	1 (1)	1 (1)	0.05	Septin-9 OS=Mus musculus GN=Sept9 PE=1 SV=1
498.1	tr|B1ARP0|B1ARP0_MOUSE	70	20677	2 (2)	2 (2)	0.35	3 beta-hydroxysteroid dehydrogenase/Delta 5-->4-isomerase type 3 (Fragment) OS=Mus musculus GN=Hsd3b3 PE=1 SV=1
498.2	sp|Q61694|3BHS5_MOUSE	53	42265	2 (2)	2 (2)	0.16	3 beta-hydroxysteroid dehydrogenase type 5 OS=Mus musculus GN=Hsd3b5 PE=1 SV=4
499	tr|Q3TN44|Q3TN44_MOUSE	70	16384	1 (1)	1 (1)	0.21	Uncharacterized protein OS=Mus musculus GN=Cyb5b PE=2 SV=1
500	tr|Q8CEG7|Q8CEG7_MOUSE	69	65214	1 (1)	1 (1)	0.05	Uncharacterized protein OS=Mus musculus GN=Exoc4 PE=2 SV=1
501	tr|A5GZX3|A5GZX3_MOUSE	69	20967	3 (3)	2 (2)	0.35	Lactoylglutathione lyase OS=Mus musculus GN=Glo1 PE=1 SV=1
502	sp|Q9DBG1|CP27A_MOUSE	69	60910	6 (4)	6 (4)	0.23	Sterol 26-hydroxylase, mitochondrial OS=Mus musculus GN=Cyp27a1 PE=1 SV=1
503	sp|P60335|PCBP1_MOUSE	69	37987	3 (3)	3 (3)	0.29	Poly(rC)-binding protein 1 OS=Mus musculus GN=Pcbp1 PE=1 SV=1
504	sp|Q9ET22|DPP2_MOUSE	68	56788	2 (2)	2 (2)	0.12	Dipeptidyl peptidase 2 OS=Mus musculus GN=Dpp7 PE=1 SV=2
505	tr|Q3TI05|Q3TI05_MOUSE	68	58424	3 (3)	3 (3)	0.18	Chaperonin containing Tcp1, subunit 6a (Zeta) OS=Mus musculus GN=Cct6a PE=2 SV=1
506	sp|Q3TLP5|ECHD2_MOUSE	68	32174	2 (2)	2 (2)	0.22	Enoyl-CoA hydratase domain-containing protein 2, mitochondrial OS=Mus musculus GN=Echdc2 PE=1 SV=2
507	tr|Q3TIF1|Q3TIF1_MOUSE	68	53145	3 (3)	3 (3)	0.2	Uncharacterized protein OS=Mus musculus GN=Ctsc PE=2 SV=1
508	tr|B1AR34|B1AR34_MOUSE	67	29891	2 (1)	2 (1)	0.11	Asialoglycoprotein receptor 1 OS=Mus musculus GN=Asgr1 PE=1 SV=1
509	tr|Q3URM4|Q3URM4_MOUSE	66	47059	1 (1)	1 (1)	0.07	Uncharacterized protein OS=Mus musculus GN=Erp44 PE=2 SV=1
510	sp|Q9WUU7|CATZ_MOUSE	66	34658	3 (2)	2 (2)	0.2	Cathepsin Z OS=Mus musculus GN=Ctsz PE=1 SV=1
511	tr|Q3T984|Q3T984_MOUSE	66	57098	4 (3)	4 (3)	0.18	Uncharacterized protein OS=Mus musculus GN=Ptbp1 PE=2 SV=1
512	tr|Q3U7C0|Q3U7C0_MOUSE	66	89932	2 (2)	2 (2)	0.07	Uncharacterized protein OS=Mus musculus GN=Afg3l2 PE=2 SV=1
513	tr|Q3U6F6|Q3U6F6_MOUSE	66	58835	1 (1)	1 (1)	0.06	Uncharacterized protein OS=Mus musculus GN=Sars PE=2 SV=1
514	sp|Q8K370|ACD10_MOUSE	66	119816	1 (1)	1 (1)	0.03	Acyl-CoA dehydrogenase family member 10 OS=Mus musculus GN=Acad10 PE=1 SV=1
515	tr|Q3TEU8|Q3TEU8_MOUSE	66	53758	1 (1)	1 (1)	0.06	Coronin OS=Mus musculus GN=Coro1c PE=2 SV=1
516	sp|Q9CQ92|FIS1_MOUSE	66	17055	1 (1)	1 (1)	0.2	Mitochondrial fission 1 protein OS=Mus musculus GN=Fis1 PE=1 SV=1
517	sp|P26151|FCGR1_MOUSE	65	45259	1 (1)	1 (1)	0.07	High affinity immunoglobulin gamma Fc receptor I OS=Mus musculus GN=Fcgr1 PE=1 SV=1
518	tr|A0A0R4J050|A0A0R4J050_MOUSE	65	45994	1 (1)	1 (1)	0.07	Aminoacylase-1 OS=Mus musculus GN=Acy1 PE=1 SV=1
519	tr|A2A813|A2A813_MOUSE	65	18691	2 (2)	1 (1)	0.39	Protein DJ-1 OS=Mus musculus GN=Park7 PE=1 SV=1
520	tr|X5J5N0|X5J5N0_MOUSE	65	12410	3 (2)	2 (1)	0.63	IgM heavy chain VDJ region (Fragment) OS=Mus musculus PE=2 SV=1
521	tr|Q3U8U8|Q3U8U8_MOUSE	65	70824	4 (4)	4 (4)	0.2	Polyadenylate-binding protein OS=Mus musculus GN=Pabpc1 PE=2 SV=1
522	tr|Q3TZ32|Q3TZ32_MOUSE	65	107649	4 (4)	3 (3)	0.09	Uncharacterized protein OS=Mus musculus GN=Aars PE=2 SV=1
523	tr|Q8BK80|Q8BK80_MOUSE	64	47048	1 (1)	1 (1)	0.07	Lon protease homolog 2, peroxisomal OS=Mus musculus GN=Lonp2 PE=1 SV=1
524	tr|A2A547|A2A547_MOUSE	64	23347	2 (2)	2 (2)	0.31	Ribosomal protein L19 OS=Mus musculus GN=Rpl19 PE=1 SV=1
525	tr|A0A0R4J0P1|A0A0R4J0P1_MOUSE	64	45861	3 (2)	3 (2)	0.15	Acyl-Coenzyme A dehydrogenase family, member 8 OS=Mus musculus GN=Acad8 PE=1 SV=1
526	tr|A0A1B0GR60|A0A1B0GR60_MOUSE	64	18045	1 (1)	1 (1)	0.19	Ferritin OS=Mus musculus GN=Ftl1 PE=1 SV=1
527	tr|Q3U4U6|Q3U4U6_MOUSE	64	61162	4 (2)	4 (2)	0.11	T-complex protein 1 subunit gamma OS=Mus musculus GN=Cct3 PE=1 SV=1
528	sp|Q8BGC4|PTGR3_MOUSE	64	40788	2 (2)	2 (2)	0.17	Prostaglandin reductase-3 OS=Mus musculus GN=Zadh2 PE=1 SV=1
529	tr|A0A0U1RNN5|A0A0U1RNN5_MOUSE	64	14650	1 (1)	1 (1)	0.23	Leukosialin (Fragment) OS=Mus musculus GN=Spn PE=1 SV=1
530	tr|D3YUM1|D3YUM1_MOUSE	64	50566	3 (3)	3 (3)	0.21	NADH dehydrogenase [ubiquinone] flavoprotein 1, mitochondrial OS=Mus musculus GN=Ndufv1 PE=1 SV=1
531	sp|Q02105|C1QC_MOUSE	64	26374	2 (1)	2 (1)	0.13	Complement C1q subcomponent subunit C OS=Mus musculus GN=C1qc PE=1 SV=2
532	tr|Q3U3L3|Q3U3L3_MOUSE	64	42883	5 (4)	5 (4)	0.35	Uncharacterized protein OS=Mus musculus GN=Serpinb6a PE=2 SV=1
533	tr|A0A075B5S6|A0A075B5S6_MOUSE	64	13215	1 (1)	1 (1)	0.26	Immunoglobulin heavy variable 3-1 (Fragment) OS=Mus musculus GN=Ighv3-1 PE=4 SV=1
534	tr|A0A1D5RLI1|A0A1D5RLI1_MOUSE	64	52539	4 (4)	3 (3)	0.28	Cytochrome P450, family 2, subfamily c, polypeptide 44 OS=Mus musculus GN=Cyp2c44 PE=1 SV=1
535	sp|Q9Z2D6|MECP2_MOUSE	63	52447	2 (2)	2 (2)	0.13	Methyl-CpG-binding protein 2 OS=Mus musculus GN=Mecp2 PE=1 SV=1
536	sp|Q8K224|NAT10_MOUSE	63	116258	1 (1)	1 (1)	0.03	RNA cytidine acetyltransferase OS=Mus musculus GN=Nat10 PE=1 SV=1
537	tr|Q3U645|Q3U645_MOUSE	63	75840	6 (5)	5 (5)	0.24	Uncharacterized protein OS=Mus musculus GN=Abcd3 PE=2 SV=1
538	tr|A3KML3|A3KML3_MOUSE	63	28046	2 (1)	2 (1)	0.12	MCG126220 OS=Mus musculus GN=Ywhaq PE=2 SV=1
539	tr|Q3TL95|Q3TL95_MOUSE	63	28155	1 (1)	1 (1)	0.12	Proteasome subunit alpha type (Fragment) OS=Mus musculus GN=Psma4 PE=2 SV=1
540	tr|F8WHP8|F8WHP8_MOUSE	62	9057	3 (3)	2 (2)	0.91	ATP synthase subunit f, mitochondrial OS=Mus musculus GN=Atp5j2 PE=1 SV=1
541	tr|G3UXL2|G3UXL2_MOUSE	62	35315	2 (2)	2 (2)	0.2	Phosphoribosyl pyrophosphate synthetase 1-like 3 OS=Mus musculus GN=Prps1l3 PE=3 SV=1
542	sp|Q9DBR1|XRN2_MOUSE	62	109588	1 (1)	1 (1)	0.03	5'-3' exoribonuclease 2 OS=Mus musculus GN=Xrn2 PE=1 SV=1
543	tr|A0A087WR97|A0A087WR97_MOUSE	62	26983	2 (2)	2 (2)	0.26	TAR DNA-binding protein 43 (Fragment) OS=Mus musculus GN=Tardbp PE=1 SV=1
544	tr|B2RY51|B2RY51_MOUSE	62	226877	1 (1)	1 (1)	0.01	Thyroid hormone receptor interactor 11 OS=Mus musculus GN=Trip11 PE=2 SV=1
545	sp|Q8R0F9|S14L4_MOUSE	62	46423	2 (2)	2 (2)	0.15	SEC14-like protein 4 OS=Mus musculus GN=Sec14l4 PE=1 SV=1
546	tr|E0CXB2|E0CXB2_MOUSE	62	73146	1 (1)	1 (1)	0.04	Importin-9 OS=Mus musculus GN=Ipo9 PE=1 SV=1
547	tr|Q3TVV7|Q3TVV7_MOUSE	62	52673	2 (2)	1 (1)	0.13	Uncharacterized protein OS=Mus musculus GN=Umps PE=2 SV=1
548	tr|G3UYV7|G3UYV7_MOUSE	62	6397	1 (1)	1 (1)	0.56	40S ribosomal protein S28 (Fragment) OS=Mus musculus GN=Rps28 PE=1 SV=1
549	sp|Q8CG76|ARK72_MOUSE	61	41042	3 (3)	3 (3)	0.26	Aflatoxin B1 aldehyde reductase member 2 OS=Mus musculus GN=Akr7a2 PE=1 SV=3
550	sp|Q61102|ABCB7_MOUSE	61	82871	3 (3)	2 (2)	0.08	ATP-binding cassette sub-family B member 7, mitochondrial OS=Mus musculus GN=Abcb7 PE=1 SV=3
551	tr|Q3TEE6|Q3TEE6_MOUSE	61	76157	1 (1)	1 (1)	0.04	Uncharacterized protein OS=Mus musculus GN=Fermt3 PE=1 SV=1
552	tr|A2A977|A2A977_MOUSE	61	57495	4 (4)	3 (3)	0.18	Cytochrome P450 4A10 OS=Mus musculus GN=Cyp4a10 PE=1 SV=1
553	tr|B2RSR0|B2RSR0_MOUSE	61	61356	1 (1)	1 (1)	0.05	Cytochrome P450, family 4, subfamily v, polypeptide 3 OS=Mus musculus GN=Cyp4v3 PE=1 SV=1
554	sp|Q61838|PZP_MOUSE	61	167116	5 (5)	5 (5)	0.1	Pregnancy zone protein OS=Mus musculus GN=Pzp PE=1 SV=3
555	sp|O08705|NTCP_MOUSE	61	39843	2 (1)	2 (1)	0.08	Sodium/bile acid cotransporter OS=Mus musculus GN=Slc10a1 PE=1 SV=1
556	sp|P61458|PHS_MOUSE	61	12035	3 (3)	2 (2)	0.66	Pterin-4-alpha-carbinolamine dehydratase OS=Mus musculus GN=Pcbd1 PE=1 SV=2
557	tr|Q3UEJ8|Q3UEJ8_MOUSE	61	44446	5 (4)	3 (3)	0.24	Pipecolic acid oxidase OS=Mus musculus GN=Pipox PE=1 SV=1
558	tr|Q3TDD8|Q3TDD8_MOUSE	60	68783	3 (2)	3 (2)	0.1	Uncharacterized protein OS=Mus musculus GN=Eif4b PE=2 SV=1
559	sp|O55234|PSB5_MOUSE	60	28685	1 (1)	1 (1)	0.12	Proteasome subunit beta type-5 OS=Mus musculus GN=Psmb5 PE=1 SV=3
560	sp|O35744|CHIL3_MOUSE	60	44772	2 (1)	2 (1)	0.07	Chitinase-like protein 3 OS=Mus musculus GN=Chil3 PE=1 SV=2
561	tr|D3Z0Z6|D3Z0Z6_MOUSE	60	8462	2 (2)	1 (1)	0.42	Elongation of very long chain fatty acids protein (Fragment) OS=Mus musculus GN=Elovl5 PE=1 SV=1
562.1	tr|A0A140T8N5|A0A140T8N5_MOUSE	60	12893	3 (3)	2 (2)	1.03	Immunoglobulin kappa variable 6-23 (Fragment) OS=Mus musculus GN=Igkv6-23 PE=4 SV=2
562.2	tr|A0A140T8N7|A0A140T8N7_MOUSE	57	12845	2 (2)	2 (2)	0.6	Immunoglobulin kappa chain variable 6-25 (Fragment) OS=Mus musculus GN=Igkv6-25 PE=4 SV=2
562.3	tr|A0A140T8M5|A0A140T8M5_MOUSE	32	12863	2 (2)	2 (2)	0.6	Immunoglobulin kappa variable 6-15 (Fragment) OS=Mus musculus GN=Igkv6-15 PE=1 SV=2
563	tr|A2ARD7|A2ARD7_MOUSE	60	36839	2 (2)	2 (2)	0.19	Kynureninase OS=Mus musculus GN=Kynu PE=1 SV=1
564	tr|A0A1S6GWH1|A0A1S6GWH1_MOUSE	60	46819	1 (1)	1 (1)	0.07	Uncharacterized protein OS=Mus musculus GN=Psmc5 PE=2 SV=1
565	tr|Q3U9P0|Q3U9P0_MOUSE	60	18919	3 (3)	1 (1)	0.18	Uncharacterized protein OS=Mus musculus GN=Rps10 PE=2 SV=1
566	tr|A0A077S2U6|A0A077S2U6_MOUSE	60	17134	2 (2)	2 (2)	0.43	Lysozyme OS=Mus musculus GN=Lyz2 PE=1 SV=1
567	tr|Q3TXK9|Q3TXK9_MOUSE	59	53103	2 (2)	2 (2)	0.13	Uncharacterized protein (Fragment) OS=Mus musculus GN=Gsr PE=2 SV=1
568	sp|Q60817|NACA_MOUSE	59	23370	1 (1)	1 (1)	0.14	Nascent polypeptide-associated complex subunit alpha OS=Mus musculus GN=Naca PE=1 SV=1
569	tr|A0A0R4J1T9|A0A0R4J1T9_MOUSE	59	57211	3 (3)	2 (2)	0.18	Proline dehydrogenase OS=Mus musculus GN=Prodh PE=1 SV=1
570	tr|Q3UXS6|Q3UXS6_MOUSE	59	14692	2 (2)	1 (1)	0.52	Uncharacterized protein OS=Mus musculus GN=Rps15 PE=2 SV=1
571	tr|A0A075B5M3|A0A075B5M3_MOUSE	59	10401	2 (2)	2 (2)	0.77	Immunoglobulin kappa variable 4-58 OS=Mus musculus GN=Igkv4-58 PE=1 SV=1
572	tr|A0A1B0GT66|A0A1B0GT66_MOUSE	59	29791	2 (2)	2 (2)	0.24	Uncharacterized protein (Fragment) OS=Mus musculus PE=1 SV=1
573	sp|Q9D883|U2AF1_MOUSE	59	28311	1 (1)	1 (1)	0.12	Splicing factor U2AF 35 kDa subunit OS=Mus musculus GN=U2af1 PE=1 SV=4
574	tr|Q3TBM1|Q3TBM1_MOUSE	58	115118	2 (2)	1 (1)	0.03	Alpha-mannosidase OS=Mus musculus GN=Man2b1 PE=2 SV=1
575	tr|A0A1Y7VL14|A0A1Y7VL14_MOUSE	58	24408	1 (1)	1 (1)	0.14	Solute carrier family 25 member 47 OS=Mus musculus GN=Slc25a47 PE=4 SV=1
576	sp|Q8VEK0|CC50A_MOUSE	58	41377	1 (1)	1 (1)	0.08	Cell cycle control protein 50A OS=Mus musculus GN=Tmem30a PE=1 SV=1
577	tr|Q6PBC0|Q6PBC0_MOUSE	58	15036	3 (3)	3 (3)	0.85	Cds2 protein OS=Mus musculus GN=Cds2 PE=1 SV=1
578	sp|O55029|COPB2_MOUSE	58	103240	3 (3)	3 (3)	0.1	Coatomer subunit beta' OS=Mus musculus GN=Copb2 PE=1 SV=2
579	sp|Q9QZD8|DIC_MOUSE	58	32150	5 (3)	5 (3)	0.34	Mitochondrial dicarboxylate carrier OS=Mus musculus GN=Slc25a10 PE=1 SV=2
580	tr|B1AXY0|B1AXY0_MOUSE	58	23672	2 (2)	2 (2)	0.3	DnaJ homolog subfamily A member 1 (Fragment) OS=Mus musculus GN=Dnaja1 PE=1 SV=1
581	tr|Q8BPA1|Q8BPA1_MOUSE	58	31744	1 (1)	1 (1)	0.1	Uncharacterized protein OS=Mus musculus GN=Stom PE=2 SV=1
582	tr|H3BL49|H3BL49_MOUSE	58	53391	2 (2)	2 (2)	0.13	T-complex protein 1 subunit theta OS=Mus musculus GN=Cct8 PE=1 SV=1
583	tr|A2AR07|A2AR07_MOUSE	58	21456	1 (1)	1 (1)	0.16	Lupus La protein homolog (Fragment) OS=Mus musculus GN=Ssb PE=1 SV=1
584	tr|A0A0R4J0B2|A0A0R4J0B2_MOUSE	58	63377	4 (3)	4 (3)	0.16	Phospholipase B-like 1 OS=Mus musculus GN=Plbd1 PE=1 SV=1
585	tr|Q1HL32|Q1HL32_MOUSE	57	141867	1 (1)	1 (1)	0.02	Structural maintenance of chromosomes protein OS=Mus musculus GN=Smc3 PE=1 SV=1
586	sp|Q9D1M0|SEC13_MOUSE	57	36056	1 (1)	1 (1)	0.09	Protein SEC13 homolog OS=Mus musculus GN=Sec13 PE=1 SV=3
587	tr|Q3TVN4|Q3TVN4_MOUSE	57	104638	4 (2)	4 (2)	0.06	AP complex subunit beta OS=Mus musculus GN=Ap1b1 PE=2 SV=1
588	tr|D3Z3E6|D3Z3E6_MOUSE	57	15484	1 (1)	1 (1)	0.22	Transmembrane protein 56 (Fragment) OS=Mus musculus GN=Tmem56 PE=1 SV=1
589	tr|Q7TMX2|Q7TMX2_MOUSE	57	66023	2 (2)	2 (2)	0.1	Protein phosphatase 2 (Formerly 2A), regulatory subunit A (PR 65), alpha isoform OS=Mus musculus GN=Ppp2r1a PE=2 SV=1
590	sp|A2AS89|SPEB_MOUSE	57	38744	2 (2)	2 (2)	0.18	Agmatinase, mitochondrial OS=Mus musculus GN=Agmat PE=1 SV=1
591	tr|G5E8Z4|G5E8Z4_MOUSE	57	70793	1 (1)	1 (1)	0.05	Transporter OS=Mus musculus GN=Slc6a12 PE=1 SV=1
592	sp|Q60692|PSB6_MOUSE	57	25591	2 (2)	2 (2)	0.28	Proteasome subunit beta type-6 OS=Mus musculus GN=Psmb6 PE=1 SV=3
593	tr|Q3U7D2|Q3U7D2_MOUSE	57	24245	2 (2)	2 (2)	0.3	Ribosomal protein L15 OS=Mus musculus GN=Rpl15 PE=2 SV=1
594	tr|Q4FK74|Q4FK74_MOUSE	57	17589	1 (1)	1 (1)	0.19	ATP synthase, H+ transporting, mitochondrial F1 complex, delta subunit, isoform CRA_c OS=Mus musculus GN=Atp5d PE=1 SV=1
595	sp|Q3TRM8|HXK3_MOUSE	57	101747	3 (2)	2 (1)	0.07	Hexokinase-3 OS=Mus musculus GN=Hk3 PE=1 SV=2
596	tr|D3YYA5|D3YYA5_MOUSE	57	23691	1 (1)	1 (1)	0.14	Ubiquitin carboxyl-terminal hydrolase 5 (Fragment) OS=Mus musculus GN=Usp5 PE=1 SV=1
597	tr|Q3TWT5|Q3TWT5_MOUSE	56	45028	2 (2)	2 (2)	0.15	Uncharacterized protein OS=Mus musculus GN=Asah1 PE=2 SV=1
598	tr|A2AC16|A2AC16_MOUSE	56	25202	1 (1)	1 (1)	0.13	Dicarbonyl L-xylulose reductase, isoform CRA_a OS=Mus musculus GN=Dcxr PE=1 SV=1
599	sp|Q8R0W0|EPIPL_MOUSE	56	726989	1 (1)	1 (1)		Epiplakin OS=Mus musculus GN=Eppk1 PE=1 SV=2
600	tr|A2NVE9|A2NVE9_MOUSE	56	12002	2 (2)	2 (2)	0.66	Immnuoglobulin kappa light chain (Fragment) OS=Mus musculus PE=4 SV=1
601	tr|D3YX34|D3YX34_MOUSE	56	127370	1 (1)	1 (1)	0.03	Dynactin subunit 1 OS=Mus musculus GN=Dctn1 PE=1 SV=1
602	tr|A0A1B0GSW3|A0A1B0GSW3_MOUSE	56	123282	1 (1)	1 (1)	0.03	Nuclear mitotic apparatus protein 1 (Fragment) OS=Mus musculus GN=Numa1 PE=1 SV=1
603	tr|Q3UZT7|Q3UZT7_MOUSE	56	86069	2 (2)	2 (2)	0.08	Uncharacterized protein OS=Mus musculus GN=Ctnnb1 PE=2 SV=1
604	tr|Q3UIG0|Q3UIG0_MOUSE	56	52587	1 (1)	1 (1)	0.06	Eukaryotic translation initiation factor 3 subunit E OS=Mus musculus GN=Eif3e PE=1 SV=1
605	tr|Q3UL78|Q3UL78_MOUSE	56	16721	2 (2)	1 (1)	0.2	Uncharacterized protein OS=Mus musculus GN=Cdc42 PE=2 SV=1
606	sp|Q3U9G9|LBR_MOUSE	56	71965	2 (2)	2 (2)	0.09	Lamin-B receptor OS=Mus musculus GN=Lbr PE=1 SV=2
607	tr|Q3TCV9|Q3TCV9_MOUSE	55	56757	4 (3)	3 (3)	0.18	Uncharacterized protein OS=Mus musculus GN=Npepl1 PE=2 SV=1
608	tr|Q8BH78|Q8BH78_MOUSE	55	38380	1 (1)	1 (1)	0.09	Reticulon OS=Mus musculus GN=Rtn4 PE=1 SV=1
609	tr|A0A075B5P5|A0A075B5P5_MOUSE	55	36743	4 (2)	4 (2)	0.19	Immunoglobulin heavy constant gamma 3 (Fragment) OS=Mus musculus GN=Ighg3 PE=4 SV=1
610	tr|Q3U8W4|Q3U8W4_MOUSE	55	24832	2 (2)	2 (2)	0.29	Superoxide dismutase OS=Mus musculus GN=Sod2 PE=2 SV=1
611	tr|A0A0G2JGC1|A0A0G2JGC1_MOUSE	55	32031	3 (2)	2 (2)	0.22	Serine/threonine-protein phosphatase OS=Mus musculus GN=Ppp1cc PE=1 SV=1
612	tr|Q3TB69|Q3TB69_MOUSE	55	80576	2 (2)	2 (2)	0.08	Uncharacterized protein OS=Mus musculus GN=Anpep PE=2 SV=1
613	tr|A2AAW9|A2AAW9_MOUSE	55	37627	2 (2)	2 (2)	0.18	Eukaryotic translation initiation factor 2 subunit 3, X-linked OS=Mus musculus GN=Eif2s3x PE=1 SV=1
614	tr|Q3UD26|Q3UD26_MOUSE	55	34696	1 (1)	1 (1)	0.1	Uncharacterized protein OS=Mus musculus GN=Psmd14 PE=2 SV=1
615	tr|F7D1R5|F7D1R5_MOUSE	55	23588	1 (1)	1 (1)	0.14	Phospholipase A-2-activating protein (Fragment) OS=Mus musculus GN=Plaa PE=1 SV=1
616	tr|Q3TGU7|Q3TGU7_MOUSE	55	44013	4 (3)	4 (3)	0.24	Proliferation-associated 2G4 OS=Mus musculus GN=Pa2g4 PE=1 SV=1
617	tr|Q4FK36|Q4FK36_MOUSE	55	18852	2 (1)	2 (1)	0.18	Destrin OS=Mus musculus GN=Dstn PE=1 SV=1
618	tr|G3X8X1|G3X8X1_MOUSE	55	66339	1 (1)	1 (1)	0.05	RIKEN cDNA 2810439F02 OS=Mus musculus GN=Ttc39c PE=1 SV=1
619	tr|Q3TIU8|Q3TIU8_MOUSE	54	68141	2 (1)	1 (1)	0.05	Uncharacterized protein OS=Mus musculus GN=Abce1 PE=2 SV=1
620	tr|Q6P2K2|Q6P2K2_MOUSE	54	49838	1 (1)	1 (1)	0.07	Acyl-CoA thioesterase 2 OS=Mus musculus GN=Acot2 PE=2 SV=1
621	tr|Q3U3M5|Q3U3M5_MOUSE	54	64708	1 (1)	1 (1)	0.05	Cyclin-K OS=Mus musculus GN=Ccnk PE=1 SV=1
622	tr|A0A0U1RP81|A0A0U1RP81_MOUSE	54	53969	1 (1)	1 (1)	0.06	MICOS complex subunit MIC60 OS=Mus musculus GN=Immt PE=1 SV=1
623	tr|A0A087WPL5|A0A087WPL5_MOUSE	54	150836	3 (1)	3 (1)	0.02	ATP-dependent RNA helicase A OS=Mus musculus GN=Dhx9 PE=1 SV=1
624	tr|A2RSV8|A2RSV8_MOUSE	54	19575	2 (1)	2 (1)	0.17	Cytochrome c oxidase subunit IV isoform 1 OS=Mus musculus GN=Cox4i1 PE=1 SV=1
625	tr|Q3TWE1|Q3TWE1_MOUSE	54	46237	1 (1)	1 (1)	0.07	Uncharacterized protein OS=Mus musculus GN=Lamp2 PE=2 SV=1
626	tr|A0A075B5Q1|A0A075B5Q1_MOUSE	53	12822	1 (1)	1 (1)	0.27	Immunoglobulin heavy variable V2-4 (Fragment) OS=Mus musculus GN=Ighv2-4 PE=4 SV=1
627	tr|A0A0R4J0P7|A0A0R4J0P7_MOUSE	53	43803	2 (2)	2 (2)	0.16	Solute carrier family 22 member 18 OS=Mus musculus GN=Slc22a18 PE=1 SV=1
628	sp|Q9WVJ3|CBPQ_MOUSE	53	51837	2 (2)	2 (2)	0.13	Carboxypeptidase Q OS=Mus musculus GN=Cpq PE=1 SV=1
629	sp|Q3UNZ8|QORL2_MOUSE	53	38298	3 (2)	3 (2)	0.18	Quinone oxidoreductase-like protein 2 OS=Mus musculus PE=1 SV=1
630	tr|D3YVF4|D3YVF4_MOUSE	53	12874	1 (1)	1 (1)	0.27	40S ribosomal protein S14 (Fragment) OS=Mus musculus GN=Rps14 PE=1 SV=1
631	tr|Q3TJ49|Q3TJ49_MOUSE	53	50196	3 (1)	2 (1)	0.07	Annexin OS=Mus musculus GN=Anxa7 PE=2 SV=1
632	tr|Q3THX5|Q3THX5_MOUSE	53	96984	3 (3)	3 (3)	0.1	Uncharacterized protein OS=Mus musculus GN=Mvp PE=2 SV=1
633	sp|P50427|STS_MOUSE	53	67233	1 (1)	1 (1)	0.05	Steryl-sulfatase OS=Mus musculus GN=Sts PE=1 SV=1
634	sp|A3KMP2|TTC38_MOUSE	53	52703	1 (1)	1 (1)	0.06	Tetratricopeptide repeat protein 38 OS=Mus musculus GN=Ttc38 PE=1 SV=2
635	sp|Q8JZZ0|UD3A2_MOUSE	52	59805	2 (2)	2 (2)	0.11	UDP-glucuronosyltransferase 3A2 OS=Mus musculus GN=Ugt3a2 PE=1 SV=2
636	sp|Q6P5E4|UGGG1_MOUSE	52	177007	3 (2)	3 (2)	0.04	UDP-glucose:glycoprotein glucosyltransferase 1 OS=Mus musculus GN=Uggt1 PE=1 SV=4
637	tr|A0A0R4J007|A0A0R4J007_MOUSE	52	97786	2 (1)	2 (1)	0.03	Paladin OS=Mus musculus GN=Pald1 PE=1 SV=1
638	tr|A0A0R4J0N7|A0A0R4J0N7_MOUSE	52	58181	3 (1)	3 (1)	0.06	7-alpha-hydroxycholest-4-en-3-one 12-alpha-hydroxylase OS=Mus musculus GN=Cyp8b1 PE=1 SV=1
639	sp|O35295|PURB_MOUSE	52	33995	1 (1)	1 (1)	0.1	Transcriptional activator protein Pur-beta OS=Mus musculus GN=Purb PE=1 SV=3
640	tr|C5NSA7|C5NSA7_MOUSE	52	45927	1 (1)	1 (1)	0.07	Tryptophan 2,3-dioxygenase OS=Mus musculus GN=Tdo2 PE=1 SV=1
641	tr|A2RS23|A2RS23_MOUSE	52	55962	1 (1)	1 (1)	0.06	Peptidase D OS=Mus musculus GN=Pepd PE=1 SV=1
642	tr|B1AYU4|B1AYU4_MOUSE	52	83328	1 (1)	1 (1)	0.04	Pre-mRNA-splicing factor CWC22 homolog OS=Mus musculus GN=Cwc22 PE=1 SV=1
643	sp|Q9CQU3|RER1_MOUSE	52	23087	1 (1)	1 (1)	0.15	Protein RER1 OS=Mus musculus GN=Rer1 PE=1 SV=1
644	tr|D3YUG4|D3YUG4_MOUSE	52	15338	2 (1)	2 (1)	0.22	Acyl-protein thioesterase 1 (Fragment) OS=Mus musculus GN=Lypla1 PE=1 SV=1
645	tr|Q5SX46|Q5SX46_MOUSE	51	20973	2 (2)	2 (2)	0.35	Mitochondrial 2-oxoglutarate/malate carrier protein (Fragment) OS=Mus musculus GN=Slc25a11 PE=1 SV=1
646	tr|E9QB02|E9QB02_MOUSE	51	103676	2 (2)	2 (2)	0.06	Methionine--tRNA ligase, cytoplasmic OS=Mus musculus GN=Mars PE=1 SV=1
647	sp|Q8JZN5|ACAD9_MOUSE	51	69192	3 (3)	2 (2)	0.15	Acyl-CoA dehydrogenase family member 9, mitochondrial OS=Mus musculus GN=Acad9 PE=1 SV=2
648	tr|A0A075B5M7|A0A075B5M7_MOUSE	51	10453	1 (1)	1 (1)	0.33	Immunoglobulin kappa variable 5-39 OS=Mus musculus GN=Igkv5-39 PE=1 SV=7
649	sp|O08692|NGP_MOUSE	51	19662	4 (3)	3 (2)	0.61	Neutrophilic granule protein OS=Mus musculus GN=Ngp PE=1 SV=1
650	sp|P18528|HVM57_MOUSE	51	11114	2 (1)	2 (1)	0.31	Ig heavy chain V region 6.96 OS=Mus musculus PE=4 SV=1
651	tr|A0A1Y7VM54|A0A1Y7VM54_MOUSE	51	13919	2 (2)	2 (2)	0.55	Transmembrane emp24 domain-containing protein 10 OS=Mus musculus GN=Tmed10 PE=4 SV=1
652	tr|F8VQC1|F8VQC1_MOUSE	51	75181	1 (1)	1 (1)	0.04	Signal recognition particle subunit SRP72 OS=Mus musculus GN=Srp72 PE=1 SV=1
653	tr|Q1XG79|Q1XG79_MOUSE	51	28854	4 (2)	4 (2)	0.24	UbiE1 OS=Mus musculus GN=Mettl7a1 PE=2 SV=1
654	tr|Q3TQX5|Q3TQX5_MOUSE	51	73455	2 (1)	2 (1)	0.04	Uncharacterized protein OS=Mus musculus GN=Ddx3x PE=1 SV=1
655	sp|P50516|VATA_MOUSE	51	68625	1 (1)	1 (1)	0.05	V-type proton ATPase catalytic subunit A OS=Mus musculus GN=Atp6v1a PE=1 SV=2
656	tr|Q3TDY6|Q3TDY6_MOUSE	50	61746	2 (2)	2 (2)	0.11	Uncharacterized protein OS=Mus musculus GN=Tpp1 PE=2 SV=1
657	sp|O70194|EIF3D_MOUSE	50	64576	1 (1)	1 (1)	0.05	Eukaryotic translation initiation factor 3 subunit D OS=Mus musculus GN=Eif3d PE=1 SV=2
658	tr|Q4FJL8|Q4FJL8_MOUSE	50	35127	1 (1)	1 (1)	0.09	Cd38 protein OS=Mus musculus GN=Cd38 PE=1 SV=1
659	tr|A0A1B0GSG5|A0A1B0GSG5_MOUSE	50	55659	1 (1)	1 (1)	0.06	Ribonuclease inhibitor OS=Mus musculus GN=Rnh1 PE=1 SV=1
660	tr|D3YTN4|D3YTN4_MOUSE	50	38362	1 (1)	1 (1)	0.09	GTPase IMAP family member 4 OS=Mus musculus GN=Gimap4 PE=1 SV=1
661	sp|P97364|SPS2_MOUSE	50	48203	2 (2)	2 (2)	0.14	Selenide, water dikinase 2 OS=Mus musculus GN=Sephs2 PE=1 SV=3
662	tr|Q9DCD8|Q9DCD8_MOUSE	50	28700	1 (1)	1 (1)	0.12	Proteasome subunit alpha type OS=Mus musculus GN=Psma3 PE=2 SV=1
663	sp|Q6ZQH8|NU188_MOUSE	50	198965	1 (1)	1 (1)	0.02	Nucleoporin NUP188 homolog OS=Mus musculus GN=Nup188 PE=1 SV=2
664	tr|Q3TX72|Q3TX72_MOUSE	50	51495	1 (1)	1 (1)	0.06	Peptidylprolyl isomerase OS=Mus musculus GN=Fkbp5 PE=2 SV=1
665	tr|A0A0A6YW67|A0A0A6YW67_MOUSE	50	8723	5 (2)	4 (2)	0.96	MCG23377, isoform CRA_b OS=Mus musculus GN=Gm8797 PE=4 SV=1
666	tr|Q3TNC5|Q3TNC5_MOUSE	50	58032	1 (1)	1 (1)	0.06	Cytochrome P450, family 2, subfamily j, polypeptide 5 OS=Mus musculus GN=Cyp2j5 PE=1 SV=1
667	tr|A0A0G2JEW6|A0A0G2JEW6_MOUSE	49	9808	1 (1)	1 (1)	0.36	Cyclin-G-associated kinase OS=Mus musculus GN=Gak PE=1 SV=1
668	sp|Q3U1J4|DDB1_MOUSE	49	128027	1 (1)	1 (1)	0.03	DNA damage-binding protein 1 OS=Mus musculus GN=Ddb1 PE=1 SV=2
669	sp|Q80W22|THNS2_MOUSE	49	54952	1 (1)	1 (1)	0.06	Threonine synthase-like 2 OS=Mus musculus GN=Thnsl2 PE=1 SV=1
670	tr|Q3TJ43|Q3TJ43_MOUSE	49	92430	3 (2)	2 (2)	0.07	Vacuolar protein sorting-associated protein 35 OS=Mus musculus GN=Vps35 PE=2 SV=1
671	tr|Q5NCJ9|Q5NCJ9_MOUSE	49	7441	2 (2)	1 (1)	1.18	RIKEN cDNA 1110020P15, isoform CRA_b OS=Mus musculus GN=Uqcr10 PE=1 SV=1
672	tr|Q5SVF7|Q5SVF7_MOUSE	49	33570	6 (5)	5 (4)	0.6	4-nitrophenylphosphatase domain and non-neuronal SNAP25-like protein homolog 1 (C. elegans), isoform CRA_f OS=Mus musculus GN=Nipsnap1 PE=1 SV=1
673	tr|A0A140LHB4|A0A140LHB4_MOUSE	49	16068	1 (1)	1 (1)	0.21	Putative L-aspartate dehydrogenase (Fragment) OS=Mus musculus GN=Aspdh PE=1 SV=1
674	tr|A0MNP4|A0MNP4_MOUSE	49	33923	1 (1)	1 (1)	0.1	CDW13/WDR61 OS=Mus musculus GN=Wdr61 PE=1 SV=1
675	tr|Q5F2B1|Q5F2B1_MOUSE	49	16255	1 (1)	1 (1)	0.21	Mannose-P-dolichol utilization defect 1 protein (Fragment) OS=Mus musculus GN=Mpdu1 PE=1 SV=8
676	tr|Q3U4Y0|Q3U4Y0_MOUSE	49	20834	3 (3)	2 (2)	0.56	Uncharacterized protein OS=Mus musculus GN=H1f0 PE=2 SV=1
677	tr|A0A140LJB7|A0A140LJB7_MOUSE	49	55570	2 (1)	2 (1)	0.06	COP9 signalosome complex subunit 1 OS=Mus musculus GN=Gps1 PE=1 SV=1
678	sp|Q8R5C5|ACTY_MOUSE	49	42369	1 (1)	1 (1)	0.08	Beta-centractin OS=Mus musculus GN=Actr1b PE=1 SV=1
679	tr|A0A1L1SSJ7|A0A1L1SSJ7_MOUSE	49	33079	1 (1)	1 (1)	0.1	Beta-galactosidase OS=Mus musculus GN=Glb1 PE=1 SV=1
680	tr|A0A0U1RPY6|A0A0U1RPY6_MOUSE	48	12983	1 (1)	1 (1)	0.26	ADP-ribosylation factor-like protein 6-interacting protein 1 (Fragment) OS=Mus musculus GN=Arl6ip1 PE=1 SV=1
681	tr|A0A1Y7VJA2|A0A1Y7VJA2_MOUSE	48	46122	1 (1)	1 (1)	0.07	Ena/VASP-like protein (Fragment) OS=Mus musculus GN=Evl PE=4 SV=1
682	tr|A0A140LHZ5|A0A140LHZ5_MOUSE	48	38582	1 (1)	1 (1)	0.09	Glutaminyl-tRNA synthetase (Fragment) OS=Mus musculus GN=Qars PE=1 SV=1
683	tr|Q9JJD8|Q9JJD8_MOUSE	48	52664	3 (2)	3 (2)	0.13	Brain cDNA, clone MNCb-1272, similar to Mus musculus chaperonin subunit 2 (beta) (Cct2), mRNA OS=Mus musculus GN=Cct2 PE=2 SV=1
684	tr|D3YVK1|D3YVK1_MOUSE	48	22753	1 (1)	1 (1)	0.15	Glutamine synthetase (Fragment) OS=Mus musculus GN=Glul PE=1 SV=8
685	tr|A0A140LJL0|A0A140LJL0_MOUSE	48	13624	1 (1)	1 (1)	0.25	CD81 antigen (Fragment) OS=Mus musculus GN=Cd81 PE=1 SV=1
686	tr|A0A0G2JG10|A0A0G2JG10_MOUSE	48	69219	1 (1)	1 (1)	0.05	Pre-mRNA-splicing factor ATP-dependent RNA helicase DHX15 OS=Mus musculus GN=Dhx15 PE=1 SV=1
687	tr|K4DI63|K4DI63_MOUSE	48	11127	2 (2)	1 (1)	0.31	Cellular repressor of E1A-stimulated genes 1, isoform CRA_a OS=Mus musculus GN=Creg1 PE=1 SV=1
688	tr|Q8K073|Q8K073_MOUSE	48	21691	1 (1)	1 (1)	0.16	Tbpl1 protein OS=Mus musculus GN=Tbpl1 PE=2 SV=1
689	sp|Q6ZWN5|RS9_MOUSE	48	22635	1 (1)	1 (1)	0.15	40S ribosomal protein S9 OS=Mus musculus GN=Rps9 PE=1 SV=3
690	tr|D3Z494|D3Z494_MOUSE	48	32896	1 (1)	1 (1)	0.1	Aldo-keto reductase family 1, member B10 (aldose reductase) OS=Mus musculus GN=Akr1b10 PE=1 SV=1
691	tr|A0A0N4SV57|A0A0N4SV57_MOUSE	47	29356	1 (1)	1 (1)	0.11	Annexin (Fragment) OS=Mus musculus GN=Anxa4 PE=1 SV=1
692	sp|Q3TNA1|XYLB_MOUSE	47	60304	2 (2)	2 (2)	0.11	Xylulose kinase OS=Mus musculus GN=Xylb PE=1 SV=1
693	tr|A0A1D5RLW5|A0A1D5RLW5_MOUSE	47	17607	2 (2)	2 (2)	0.42	60S ribosomal protein L18a OS=Mus musculus GN=Rpl18a PE=1 SV=1
694	tr|A0A140T8N2|A0A140T8N2_MOUSE	47	12721	1 (1)	1 (1)	0.27	Protein Igkv5-48 (Fragment) OS=Mus musculus GN=Igkv5-48 PE=1 SV=2
695	tr|Q99KF5|Q99KF5_MOUSE	47	24757	1 (1)	1 (1)	0.14	Hypoxanthine guanine phosphoribosyl transferase 1 OS=Mus musculus GN=Hprt PE=2 SV=1
696	tr|Q3TWG2|Q3TWG2_MOUSE	47	59626	2 (2)	2 (2)	0.11	Uncharacterized protein OS=Mus musculus GN=Prkcsh PE=2 SV=1
697	sp|Q78JT3|3HAO_MOUSE	47	32955	3 (2)	3 (2)	0.21	3-hydroxyanthranilate 3,4-dioxygenase OS=Mus musculus GN=Haao PE=1 SV=1
698	tr|Q5M9P3|Q5M9P3_MOUSE	47	16651	1 (1)	1 (1)	0.2	Rps19 protein (Fragment) OS=Mus musculus GN=Rps19 PE=2 SV=1
699	tr|A0A068BIT8|A0A068BIT8_MOUSE	47	30625	1 (1)	1 (1)	0.11	Proteasome subunit beta type OS=Mus musculus GN=Psmb8 PE=2 SV=1
700	tr|D3Z124|D3Z124_MOUSE	47	19518	1 (1)	1 (1)	0.17	DNA-(apurinic or apyrimidinic site) lyase (Fragment) OS=Mus musculus GN=Apex1 PE=1 SV=1
701	sp|P14246|GTR2_MOUSE	47	57469	2 (2)	2 (2)	0.12	Solute carrier family 2, facilitated glucose transporter member 2 OS=Mus musculus GN=Slc2a2 PE=1 SV=3
702	tr|G5E8T3|G5E8T3_MOUSE	47	13783	1 (1)	1 (1)	0.25	Signal recognition particle 19 kDa protein OS=Mus musculus GN=Srp19 PE=1 SV=1
703	sp|Q9CR68|UCRI_MOUSE	46	29634	3 (2)	2 (2)	0.24	Cytochrome b-c1 complex subunit Rieske, mitochondrial OS=Mus musculus GN=Uqcrfs1 PE=1 SV=1
704	sp|O70570|PIGR_MOUSE	46	86257	1 (1)	1 (1)	0.04	Polymeric immunoglobulin receptor OS=Mus musculus GN=Pigr PE=1 SV=1
705	tr|A3KGR9|A3KGR9_MOUSE	46	38378	1 (1)	1 (1)	0.09	Histocompatibility 13 (Fragment) OS=Mus musculus GN=H13 PE=1 SV=1
706	tr|B2RXX6|B2RXX6_MOUSE	46	285803	3 (3)	3 (3)	0.03	Spna2 protein OS=Mus musculus GN=Sptan1 PE=2 SV=1
707	tr|Q3TIF8|Q3TIF8_MOUSE	46	15385	2 (2)	1 (1)	0.22	40S ribosomal protein S24 OS=Mus musculus GN=Rps24 PE=2 SV=1
708	tr|Q8BJX0|Q8BJX0_MOUSE	46	23023	1 (1)	1 (1)	0.15	Proteasome subunit beta type OS=Mus musculus GN=Psmb2 PE=2 SV=1
709	sp|Q8CC86|PNCB_MOUSE	46	58799	1 (1)	1 (1)	0.06	Nicotinate phosphoribosyltransferase OS=Mus musculus GN=Naprt PE=1 SV=1
710	sp|Q9R1T2|SAE1_MOUSE	46	39052	1 (1)	1 (1)	0.08	SUMO-activating enzyme subunit 1 OS=Mus musculus GN=Sae1 PE=1 SV=1
711	tr|A0A075B666|A0A075B666_MOUSE	46	12872	1 (1)	1 (1)	0.27	Immunoglobulin kappa chain variable 13-85 (Fragment) OS=Mus musculus GN=Igkv13-85 PE=4 SV=5
712	sp|Q9CQ88|TSN31_MOUSE	46	23306	1 (1)	1 (1)	0.14	Tetraspanin-31 OS=Mus musculus GN=Tspan31 PE=1 SV=1
713	tr|E9Q4K7|E9Q4K7_MOUSE	46	205817	2 (2)	1 (1)	0.03	Kinesin family member 13B OS=Mus musculus GN=Kif13b PE=1 SV=1
714	tr|Q80TT4|Q80TT4_MOUSE	46	70228	2 (1)	2 (1)	0.05	MKIAA0719 protein (Fragment) OS=Mus musculus GN=Tomm70a PE=2 SV=1
715	tr|G3UXZ5|G3UXZ5_MOUSE	45	27565	2 (2)	2 (2)	0.26	Proteasome activator complex subunit 1 (Fragment) OS=Mus musculus GN=Psme1 PE=1 SV=1
716	tr|Q3U9Y3|Q3U9Y3_MOUSE	45	44741	1 (1)	1 (1)	0.07	Uncharacterized protein OS=Mus musculus GN=Ncf1 PE=2 SV=1
717	sp|Q91VT4|CBR4_MOUSE	45	25570	1 (1)	1 (1)	0.13	Carbonyl reductase family member 4 OS=Mus musculus GN=Cbr4 PE=1 SV=2
718	sp|Q9CQI6|COTL1_MOUSE	45	16048	2 (2)	2 (2)	0.47	Coactosin-like protein OS=Mus musculus GN=Cotl1 PE=1 SV=3
719	sp|A2AN08|UBR4_MOUSE	45	578883	1 (1)	1 (1)	0.01	E3 ubiquitin-protein ligase UBR4 OS=Mus musculus GN=Ubr4 PE=1 SV=1
720	tr|Q4FZE6|Q4FZE6_MOUSE	45	22113	2 (1)	2 (1)	0.15	Ribosomal protein S7 OS=Mus musculus GN=Rps7 PE=2 SV=1
721	tr|Q3TMZ8|Q3TMZ8_MOUSE	45	35687	1 (1)	1 (1)	0.09	Uncharacterized protein OS=Mus musculus GN=Hnrnpab PE=2 SV=1
722	tr|A0A0A6YWP6|A0A0A6YWP6_MOUSE	45	51235	1 (1)	1 (1)	0.06	V-type proton ATPase subunit H OS=Mus musculus GN=Atp6v1h PE=1 SV=1
723	tr|A0A1Y7VMA0|A0A1Y7VMA0_MOUSE	45	21143	1 (1)	1 (1)	0.16	Ribosyldihydronicotinamide dehydrogenase [quinone] (Fragment) OS=Mus musculus GN=Nqo2 PE=4 SV=1
724	tr|A0A140LHA2|A0A140LHA2_MOUSE	45	37142	1 (1)	1 (1)	0.09	Mitotic checkpoint protein BUB3 OS=Mus musculus GN=Bub3 PE=1 SV=1
725	tr|A0A1L1SSA8|A0A1L1SSA8_MOUSE	45	19828	1 (1)	1 (1)	0.17	Transmembrane protein 205 (Fragment) OS=Mus musculus GN=Tmem205 PE=1 SV=1
726	tr|B6VGH4|B6VGH4_MOUSE	45	58489	3 (3)	3 (3)	0.18	Cytochrome P450 OS=Mus musculus GN=Cyp1a2 PE=1 SV=1
727	tr|Q3UFV9|Q3UFV9_MOUSE	45	57884	1 (1)	1 (1)	0.06	DnaJ (Hsp40) homolog, subfamily C, member 3 OS=Mus musculus GN=Dnajc3 PE=1 SV=1
728	tr|Q3U5N9|Q3U5N9_MOUSE	44	38936	2 (2)	2 (2)	0.18	Annexin OS=Mus musculus GN=Anxa1 PE=2 SV=1
729	tr|Q3TE88|Q3TE88_MOUSE	44	12579	1 (1)	1 (1)	0.27	Transcription initiation factor IIA subunit 2 OS=Mus musculus GN=Gtf2a2 PE=1 SV=1
730	tr|A0A0G2JEW1|A0A0G2JEW1_MOUSE	44	10484	1 (1)	1 (1)	0.33	G protein-coupled receptor kinase 3 OS=Mus musculus GN=Grk3 PE=4 SV=1
731	tr|A0A075B5Q4|A0A075B5Q4_MOUSE	44	13238	1 (1)	1 (1)	0.26	Immunoglobulin heavy variable 5-12 (Fragment) OS=Mus musculus GN=Ighv5-12 PE=4 SV=1
732	tr|A2AA71|A2AA71_MOUSE	44	119321	3 (2)	2 (1)	0.06	Protein transport protein Sec24A OS=Mus musculus GN=Sec24a PE=1 SV=1
733	sp|Q9QXY6|EHD3_MOUSE	44	60840	2 (2)	2 (2)	0.11	EH domain-containing protein 3 OS=Mus musculus GN=Ehd3 PE=1 SV=2
734	tr|A0A0R4J092|A0A0R4J092_MOUSE	44	101468	1 (1)	1 (1)	0.03	Beta-mannosidase OS=Mus musculus GN=Manba PE=1 SV=1
735	tr|F6SMH4|F6SMH4_MOUSE	44	32479	1 (1)	1 (1)	0.1	Sterol O-acyltransferase 2 (Fragment) OS=Mus musculus GN=Soat2 PE=1 SV=1
736	tr|Q3TCS0|Q3TCS0_MOUSE	44	81600	1 (1)	1 (1)	0.04	Uncharacterized protein OS=Mus musculus GN=Prep PE=2 SV=1
737	tr|Q3TV94|Q3TV94_MOUSE	44	32031	1 (1)	1 (1)	0.1	Uncharacterized protein OS=Mus musculus GN=Ssr1 PE=2 SV=1
738	tr|Q0VDM9|Q0VDM9_MOUSE	43	55415	3 (3)	2 (2)	0.19	Krt78 protein (Fragment) OS=Mus musculus GN=Krt78 PE=2 SV=1
739	sp|Q8VBZ3|CLPT1_MOUSE	43	75585	2 (2)	2 (2)	0.09	Cleft lip and palate transmembrane protein 1 homolog OS=Mus musculus GN=Clptm1 PE=1 SV=1
740	tr|A0A140T8K2|A0A140T8K2_MOUSE	43	23452	1 (1)	1 (1)	0.14	Ribosomal protein 13A, pseudogene 1 OS=Mus musculus GN=Rpl13a-ps1 PE=3 SV=1
741	tr|A2AQN7|A2AQN7_MOUSE	43	22205	1 (1)	1 (1)	0.15	Glutathione synthetase (Fragment) OS=Mus musculus GN=Gss PE=1 SV=1
742	sp|Q30KP5|DFB18_MOUSE	43	10279	2 (1)	1 (1)	0.34	Beta-defensin 18 OS=Mus musculus GN=Defb18 PE=3 SV=1
743	sp|Q8BLF1|NCEH1_MOUSE	43	45939	1 (1)	1 (1)	0.07	Neutral cholesterol ester hydrolase 1 OS=Mus musculus GN=Nceh1 PE=1 SV=1
744	tr|Q6PEV0|Q6PEV0_MOUSE	43	51099	4 (4)	4 (4)	0.28	Epoxide hydrolase OS=Mus musculus GN=Ephx1 PE=2 SV=1
745	tr|Q3TYS9|Q3TYS9_MOUSE	43	92528	2 (1)	2 (1)	0.04	Uncharacterized protein (Fragment) OS=Mus musculus GN=Oplah PE=2 SV=1
746	sp|Q9CQS8|SC61B_MOUSE	43	10009	2 (2)	2 (2)	0.82	Protein transport protein Sec61 subunit beta OS=Mus musculus GN=Sec61b PE=1 SV=3
747	tr|A2RS53|A2RS53_MOUSE	43	22804	2 (2)	2 (2)	0.32	Transmembrane emp24 domain trafficking protein 2 OS=Mus musculus GN=Tmed2 PE=1 SV=1
748	tr|B1AWZ5|B1AWZ5_MOUSE	43	22987	1 (1)	1 (1)	0.15	Protein NipSnap homolog 3B OS=Mus musculus GN=Nipsnap3b PE=1 SV=1
749	tr|D3Z275|D3Z275_MOUSE	43	23556	1 (1)	1 (1)	0.14	Prenylcysteine oxidase (Fragment) OS=Mus musculus GN=Pcyox1 PE=1 SV=7
750	tr|Q0VGQ1|Q0VGQ1_MOUSE	43	34948	2 (2)	1 (1)	0.09	Hydroxysteroid (17-beta) dehydrogenase 12 OS=Mus musculus GN=Hsd17b12 PE=2 SV=1
751	tr|A2AC13|A2AC13_MOUSE	43	21064	1 (1)	1 (1)	0.16	RAS-related C3 botulinum substrate 3, isoform CRA_a (Fragment) OS=Mus musculus GN=Rac3 PE=1 SV=1
752	tr|Q0WXH7|Q0WXH7_MOUSE	42	19669	1 (1)	1 (1)	0.17	MHC class I like protein GS10 (Fragment) OS=Mus musculus GN=H2-Q4 PE=2 SV=2
753	sp|Q9DBH5|LMAN2_MOUSE	42	40746	1 (1)	1 (1)	0.08	Vesicular integral-membrane protein VIP36 OS=Mus musculus GN=Lman2 PE=1 SV=2
754	tr|Q3TA96|Q3TA96_MOUSE	42	44293	1 (1)	1 (1)	0.07	Lysosomal membrane glycoprotein 1, isoform CRA_c OS=Mus musculus GN=Lamp1 PE=1 SV=1
755	tr|V9GXV0|V9GXV0_MOUSE	42	8632	2 (2)	1 (1)	0.4	Isocitrate dehydrogenase 3 (NAD+) beta (Fragment) OS=Mus musculus GN=Idh3b PE=1 SV=1
756	tr|Q05DA2|Q05DA2_MOUSE	42	16168	2 (1)	1 (1)	0.21	Sec62 protein (Fragment) OS=Mus musculus GN=Sec62 PE=2 SV=1
757	sp|Q9QYF1|RDH11_MOUSE	42	35525	1 (1)	1 (1)	0.09	Retinol dehydrogenase 11 OS=Mus musculus GN=Rdh11 PE=1 SV=2
758	tr|Q3U5L3|Q3U5L3_MOUSE	42	58559	2 (2)	2 (2)	0.12	Uncharacterized protein OS=Mus musculus GN=Snx2 PE=2 SV=1
759	sp|Q8R1G2|CMBL_MOUSE	42	28226	2 (2)	2 (2)	0.25	Carboxymethylenebutenolidase homolog OS=Mus musculus GN=Cmbl PE=1 SV=1
760	sp|Q9WUR2|ECI2_MOUSE	41	43639	2 (2)	2 (2)	0.16	Enoyl-CoA delta isomerase 2, mitochondrial OS=Mus musculus GN=Eci2 PE=1 SV=2
761	tr|A0A1L1SQM2|A0A1L1SQM2_MOUSE	42	21586	1 (1)	1 (1)	0.16	Interferon gamma-inducible protein 47 (Fragment) OS=Mus musculus GN=Ifi47 PE=1 SV=1
762	tr|B1ARA5|B1ARA5_MOUSE	42	17020	3 (2)	3 (2)	0.44	60S ribosomal protein L26 OS=Mus musculus GN=Rpl26 PE=1 SV=1
763	tr|A0A0R4J0B6|A0A0R4J0B6_MOUSE	42	73545	1 (1)	1 (1)	0.04	ATP-binding cassette sub-family G member 2 OS=Mus musculus GN=Abcg2 PE=1 SV=1
764	sp|Q9D0M3|CY1_MOUSE	41	35533	1 (1)	1 (1)	0.09	Cytochrome c1, heme protein, mitochondrial OS=Mus musculus GN=Cyc1 PE=1 SV=1
765	tr|A0A0R4J140|A0A0R4J140_MOUSE	41	153223	1 (1)	1 (1)	0.02	Clustered mitochondria protein homolog OS=Mus musculus GN=Cluh PE=1 SV=1
766	sp|Q9JMH6|TRXR1_MOUSE	41	68239	1 (1)	1 (1)	0.05	Thioredoxin reductase 1, cytoplasmic OS=Mus musculus GN=Txnrd1 PE=1 SV=3
767	tr|Q4QRK2|Q4QRK2_MOUSE	41	45240	2 (1)	2 (1)	0.07	Fech protein (Fragment) OS=Mus musculus GN=Fech PE=2 SV=1
768	tr|A0A0F6AIX5|A0A0F6AIX5_MOUSE	41	37733	1 (1)	1 (1)	0.09	Lipid droplet-associated hydrolase OS=Mus musculus GN=Ldah PE=1 SV=1
769	tr|Q3TE06|Q3TE06_MOUSE	41	64065	2 (1)	2 (1)	0.05	Uncharacterized protein (Fragment) OS=Mus musculus GN=Wdr1 PE=2 SV=1
770	tr|Q3U0Y9|Q3U0Y9_MOUSE	41	20776	1 (1)	1 (1)	0.16	Uncharacterized protein OS=Mus musculus PE=2 SV=1
771	tr|Q3U5K1|Q3U5K1_MOUSE	41	27386	1 (1)	1 (1)	0.12	Uncharacterized protein (Fragment) OS=Mus musculus GN=Ctss PE=2 SV=1
772	tr|G3UX23|G3UX23_MOUSE	41	72134	1 (1)	1 (1)	0.05	Bifunctional UDP-N-acetylglucosamine 2-epimerase/N-acetylmannosamine kinase OS=Mus musculus GN=Gne PE=1 SV=1
773	sp|Q8K441|ABCA6_MOUSE	41	184876	1 (1)	1 (1)	0.02	ATP-binding cassette sub-family A member 6 OS=Mus musculus GN=Abca6 PE=1 SV=2
774	tr|Q3UHW9|Q3UHW9_MOUSE	41	18812	1 (1)	1 (1)	0.18	Uncharacterized protein OS=Mus musculus GN=Cfl2 PE=1 SV=1
775	sp|Q9CT10|RANB3_MOUSE	41	52826	1 (1)	1 (1)	0.06	Ran-binding protein 3 OS=Mus musculus GN=Ranbp3 PE=1 SV=2
776	tr|A2AUR3|A2AUR3_MOUSE	41	36174	1 (1)	1 (1)	0.09	Phosphotriesterase-related protein (Fragment) OS=Mus musculus GN=Pter PE=1 SV=2
777	tr|G3UYH2|G3UYH2_MOUSE	40	23762	1 (1)	1 (1)	0.14	26S proteasome non-ATPase regulatory subunit 11 (Fragment) OS=Mus musculus GN=Psmd11 PE=1 SV=1
778	tr|Q3US15|Q3US15_MOUSE	40	40945	1 (1)	1 (1)	0.08	NAD(P) dependent steroid dehydrogenase-like OS=Mus musculus GN=Nsdhl PE=1 SV=1
779	tr|A0A140LIZ5|A0A140LIZ5_MOUSE	40	43637	1 (1)	1 (1)	0.08	26S proteasome regulatory subunit 6B OS=Mus musculus GN=Psmc4 PE=1 SV=1
780	tr|Q3V2G1|Q3V2G1_MOUSE	40	30666	1 (1)	1 (1)	0.11	Uncharacterized protein OS=Mus musculus GN=Apoa1 PE=2 SV=1
781	tr|A0A0N4SVS6|A0A0N4SVS6_MOUSE	40	20041	1 (1)	1 (1)	0.17	Cellular nucleic acid-binding protein OS=Mus musculus GN=Cnbp PE=1 SV=1
782	tr|Q6RI64|Q6RI64_MOUSE	40	26583	2 (2)	2 (2)	0.27	Proteasome subunit beta type OS=Mus musculus GN=Psmb1 PE=1 SV=1
783	sp|Q8VCT3|AMPB_MOUSE	40	73054	1 (1)	1 (1)	0.04	Aminopeptidase B OS=Mus musculus GN=Rnpep PE=1 SV=2
784	sp|P61804|DAD1_MOUSE	40	12660	1 (1)	1 (1)	0.27	Dolichyl-diphosphooligosaccharide--protein glycosyltransferase subunit DAD1 OS=Mus musculus GN=Dad1 PE=1 SV=3
785	sp|Q5FW60|MUP20_MOUSE	40	21145	2 (2)	2 (2)	0.34	Major urinary protein 20 OS=Mus musculus GN=Mup20 PE=1 SV=1
786	tr|Q3TDU1|Q3TDU1_MOUSE	39	32032	2 (2)	2 (2)	0.22	Coatomer subunit delta (Fragment) OS=Mus musculus GN=Arcn1 PE=2 SV=1
787	sp|Q9DCL9|PUR6_MOUSE	39	47717	2 (2)	2 (2)	0.14	Multifunctional protein ADE2 OS=Mus musculus GN=Paics PE=1 SV=4
788	tr|A0A075DCW1|A0A075DCW1_MOUSE	39	13199	1 (1)	1 (1)	0.26	NADH-ubiquinone oxidoreductase chain 3 OS=Mus musculus GN=ND3 PE=3 SV=1
789	tr|Q3TIU3|Q3TIU3_MOUSE	39	38072	1 (1)	1 (1)	0.09	Uncharacterized protein OS=Mus musculus GN=Ahsg PE=2 SV=1
790	tr|A0A0R4J119|A0A0R4J119_MOUSE	39	146477	1 (1)	1 (1)	0.02	Cytoplasmic FMR1-interacting protein 1 OS=Mus musculus GN=Cyfip1 PE=1 SV=1
791	tr|Q14AC4|Q14AC4_MOUSE	39	11203	30 (1)	1 (1)	0.31	Gonadoliberin OS=Mus musculus GN=Gnrh1 PE=2 SV=1
792	tr|B1ATI0|B1ATI0_MOUSE	39	59809	1 (1)	1 (1)	0.05	Aldehyde dehydrogenase OS=Mus musculus GN=Aldh3a2 PE=1 SV=1
793	sp|Q91WU5|AS3MT_MOUSE	39	42451	1 (1)	1 (1)	0.08	Arsenite methyltransferase OS=Mus musculus GN=As3mt PE=1 SV=2
794	tr|G3X9Y6|G3X9Y6_MOUSE	39	37535	1 (1)	1 (1)	0.09	Aldo-keto reductase family 1, member C19 OS=Mus musculus GN=Akr1c19 PE=1 SV=1
795	tr|Q8BTS6|Q8BTS6_MOUSE	39	8779	1 (1)	1 (1)	0.4	Uncharacterized protein (Fragment) OS=Mus musculus GN=Leprot PE=2 SV=1
796	tr|D3YYZ0|D3YYZ0_MOUSE	39	58671	1 (1)	1 (1)	0.06	Cytochrome P450, family 3, subfamily a, polypeptide 57 OS=Mus musculus GN=Cyp3a57 PE=3 SV=1
797	sp|Q8R4Y8|RTTN_MOUSE	39	251865	1 (1)	1 (1)	0.01	Rotatin OS=Mus musculus GN=Rttn PE=1 SV=2
798	tr|A2AE15|A2AE15_MOUSE	39	52802	1 (1)	1 (1)	0.06	Complement factor properdin OS=Mus musculus GN=Cfp PE=2 SV=1
799	sp|P18527|HVM56_MOUSE	38	10768	1 (1)	1 (1)	0.32	Ig heavy chain V region 914 OS=Mus musculus PE=1 SV=1
800	tr|F7B8J4|F7B8J4_MOUSE	38	11425	1 (1)	1 (1)	0.3	N-fatty-acyl-amino acid synthase/hydrolase PM20D1 (Fragment) OS=Mus musculus GN=Pm20d1 PE=1 SV=1
801	sp|Q6ZQ38|CAND1_MOUSE	38	137955	3 (2)	3 (2)	0.05	Cullin-associated NEDD8-dissociated protein 1 OS=Mus musculus GN=Cand1 PE=1 SV=2
802	tr|A0A1L1SUI3|A0A1L1SUI3_MOUSE	38	48796	1 (1)	1 (1)	0.07	Solute carrier family 37 (glucose-6-phosphate transporter), member 4 OS=Mus musculus GN=Slc37a4 PE=1 SV=1
803	tr|Q3TJN9|Q3TJN9_MOUSE	38	56286	1 (1)	1 (1)	0.06	Uncharacterized protein OS=Mus musculus GN=Ptgs1 PE=2 SV=1
804	tr|Q8R3X4|Q8R3X4_MOUSE	38	51199	1 (1)	1 (1)	0.06	Timm44 protein (Fragment) OS=Mus musculus GN=Timm44 PE=2 SV=1
805	sp|P0DOV2|IFI4_MOUSE	38	70136	3 (2)	3 (2)	0.1	Interferon-activable protein 204 OS=Mus musculus GN=Ifi204 PE=1 SV=1
806	tr|A0A0J9YUK0|A0A0J9YUK0_MOUSE	38	35836	1 (1)	1 (1)	0.09	Ubiquitin-protein ligase E3A (Fragment) OS=Mus musculus GN=Ube3a PE=1 SV=1
807	tr|Q3UW66|Q3UW66_MOUSE	38	33305	1 (1)	1 (1)	0.1	Sulfurtransferase OS=Mus musculus GN=Mpst PE=1 SV=1
808	sp|Q9CWJ9|PUR9_MOUSE	38	64690	2 (2)	2 (2)	0.1	Bifunctional purine biosynthesis protein PURH OS=Mus musculus GN=Atic PE=1 SV=2
809	tr|A0A1B0GRV0|A0A1B0GRV0_MOUSE	38	35294	1 (1)	1 (1)	0.09	3'(2'),5'-bisphosphate nucleotidase 1 OS=Mus musculus GN=Bpnt1 PE=1 SV=1
810	tr|Q5DTJ5|Q5DTJ5_MOUSE	37	85113	1 (1)	1 (1)	0.04	MKIAA4177 protein (Fragment) OS=Mus musculus GN=Pex6 PE=2 SV=1
811	sp|Q8K183|PDXK_MOUSE	37	35278	1 (1)	1 (1)	0.09	Pyridoxal kinase OS=Mus musculus GN=Pdxk PE=1 SV=1
812	sp|Q9DBL7|COASY_MOUSE	37	62213	1 (1)	1 (1)	0.05	Bifunctional coenzyme A synthase OS=Mus musculus GN=Coasy PE=1 SV=2
813	sp|Q62418|DBNL_MOUSE	37	48955	1 (1)	1 (1)	0.07	Drebrin-like protein OS=Mus musculus GN=Dbnl PE=1 SV=2
814	tr|Q3TF40|Q3TF40_MOUSE	37	60654	2 (2)	2 (2)	0.11	Uncharacterized protein (Fragment) OS=Mus musculus GN=Nono PE=2 SV=1
815	sp|Q8K0C4|CP51A_MOUSE	37	57139	1 (1)	1 (1)	0.06	Lanosterol 14-alpha demethylase OS=Mus musculus GN=Cyp51a1 PE=1 SV=1
816	tr|Q3ULC7|Q3ULC7_MOUSE	37	94164	1 (1)	1 (1)	0.03	Uncharacterized protein OS=Mus musculus GN=Ddx21 PE=2 SV=1
817	sp|Q80YC5|FA12_MOUSE	37	67939	1 (1)	1 (1)	0.05	Coagulation factor XII OS=Mus musculus GN=F12 PE=1 SV=2
818	sp|P62315|SMD1_MOUSE	37	13273	1 (1)	1 (1)	0.26	Small nuclear ribonucleoprotein Sm D1 OS=Mus musculus GN=Snrpd1 PE=1 SV=1
819	sp|Q8VI47|MRP2_MOUSE	37	174872	2 (1)	1 (1)	0.02	Canalicular multispecific organic anion transporter 1 OS=Mus musculus GN=Abcc2 PE=1 SV=2
820	tr|A0A0R4J259|A0A0R4J259_MOUSE	37	62733	1 (1)	1 (1)	0.05	Heterogeneous nuclear ribonucleoprotein Q OS=Mus musculus GN=Syncrip PE=1 SV=1
821	tr|Q3UEF3|Q3UEF3_MOUSE	37	69607	1 (1)	1 (1)	0.05	Transporter OS=Mus musculus GN=Slc6a13 PE=2 SV=1
822	sp|Q99J27|ACATN_MOUSE	37	61549	1 (1)	1 (1)	0.05	Acetyl-coenzyme A transporter 1 OS=Mus musculus GN=Slc33a1 PE=1 SV=1
823	tr|A0A0R4J1Z3|A0A0R4J1Z3_MOUSE	37	28256	1 (1)	1 (1)	0.12	Transmembrane protein 33 OS=Mus musculus GN=Tmem33 PE=1 SV=1
824	tr|Q3UJQ2|Q3UJQ2_MOUSE	37	11909	1 (1)	1 (1)	0.29	Uncharacterized protein (Fragment) OS=Mus musculus GN=Hmgcs1 PE=2 SV=1
825	tr|Q3UBS3|Q3UBS3_MOUSE	37	39241	1 (1)	1 (1)	0.08	Haptoglobin OS=Mus musculus GN=Hp PE=1 SV=1
826	sp|P08030|APT_MOUSE	37	19883	1 (1)	1 (1)	0.17	Adenine phosphoribosyltransferase OS=Mus musculus GN=Aprt PE=1 SV=2
827	tr|A0A1L1STZ1|A0A1L1STZ1_MOUSE	37	21071	1 (1)	1 (1)	0.16	Cysteine and histidine-rich domain-containing protein 1 OS=Mus musculus GN=Chordc1 PE=1 SV=1
828	tr|A0A075B5M1|A0A075B5M1_MOUSE	37	10265	1 (1)	1 (1)	0.34	Immunoglobulin kappa variable 4-63 OS=Mus musculus GN=Igkv4-63 PE=1 SV=1
829	tr|A2AQY8|A2AQY8_MOUSE	37	42607	1 (1)	1 (1)	0.08	Kynurenine--oxoglutarate transaminase 1 OS=Mus musculus GN=Kyat1 PE=1 SV=1
830	tr|A0A140T8K8|A0A140T8K8_MOUSE	37	24050	1 (1)	1 (1)	0.14	60S ribosomal protein L13 OS=Mus musculus GN=Rpl13-ps3 PE=3 SV=1
831	sp|A2AJL3|FGGY_MOUSE	37	60982	1 (1)	1 (1)	0.05	FGGY carbohydrate kinase domain-containing protein OS=Mus musculus GN=Fggy PE=1 SV=1
832	tr|Q3TG37|Q3TG37_MOUSE	36	38862	1 (1)	1 (1)	0.09	Na(+)/H(+) exchange regulatory cofactor NHE-RF OS=Mus musculus GN=Slc9a3r1 PE=2 SV=1
833	tr|J3QN31|J3QN31_MOUSE	36	53088	1 (1)	1 (1)	0.06	Adenylosuccinate synthetase isozyme 1 OS=Mus musculus GN=Adssl1 PE=1 SV=1
834	sp|P10493|NID1_MOUSE	36	139302	1 (1)	1 (1)	0.02	Nidogen-1 OS=Mus musculus GN=Nid1 PE=1 SV=2
835	tr|A0A0A0MQM0|A0A0A0MQM0_MOUSE	36	16520	1 (1)	1 (1)	0.2	Eukaryotic translation initiation factor 5A (Fragment) OS=Mus musculus GN=Eif5a PE=1 SV=1
836	sp|Q8R1Q9|RBSK_MOUSE	36	34610	1 (1)	1 (1)	0.1	Ribokinase OS=Mus musculus GN=Rbks PE=1 SV=1
837	tr|Q5M8M8|Q5M8M8_MOUSE	36	17633	1 (1)	1 (1)	0.19	60S ribosomal protein L29 OS=Mus musculus GN=Rpl29 PE=1 SV=1
838	tr|B7ZP20|B7ZP20_MOUSE	36	130209	2 (2)	2 (2)	0.05	Ankyrin repeat and FYVE domain containing 1 OS=Mus musculus GN=Ankfy1 PE=2 SV=1
839	tr|G5E8X1|G5E8X1_MOUSE	36	22470	1 (1)	1 (1)	0.15	Methyltransferase-like 26 OS=Mus musculus GN=Mettl26 PE=1 SV=1
840	tr|A0A0R4J275|A0A0R4J275_MOUSE	36	17679	1 (1)	1 (1)	0.19	NADH dehydrogenase [ubiquinone] 1 alpha subcomplex subunit 12 OS=Mus musculus GN=Ndufa12 PE=1 SV=1
841	tr|A0A0J9YUD5|A0A0J9YUD5_MOUSE	36	235288	1 (1)	1 (1)	0.01	Nucleoporin 205 OS=Mus musculus GN=Nup205 PE=1 SV=1
842	tr|Q3TG75|Q3TG75_MOUSE	36	48723	1 (1)	1 (1)	0.07	Ornithine aminotransferase, isoform CRA_b OS=Mus musculus GN=Oat PE=1 SV=1
843	tr|Q3UB60|Q3UB60_MOUSE	36	41116	1 (1)	1 (1)	0.08	Uncharacterized protein OS=Mus musculus GN=Ppid PE=2 SV=1
844	tr|Q8K0E9|Q8K0E9_MOUSE	36	36960	2 (2)	2 (2)	0.19	Dhdh protein (Fragment) OS=Mus musculus GN=Dhdh PE=2 SV=1
845	tr|Q3UW87|Q3UW87_MOUSE	36	57797	2 (1)	2 (1)	0.06	CYP3A13 OS=Mus musculus GN=Cyp3a13 PE=1 SV=1
846	tr|Q3UEK4|Q3UEK4_MOUSE	35	44479	1 (1)	1 (1)	0.07	Ureidopropionase, beta, isoform CRA_a OS=Mus musculus GN=Upb1 PE=1 SV=1
847	sp|Q99JB2|STML2_MOUSE	35	38475	1 (1)	1 (1)	0.09	Stomatin-like protein 2, mitochondrial OS=Mus musculus GN=Stoml2 PE=1 SV=1
848	tr|F6ZTG3|F6ZTG3_MOUSE	35	23906	2 (2)	2 (2)	0.3	Glyoxalase domain-containing protein 4 (Fragment) OS=Mus musculus GN=Glod4 PE=1 SV=1
849	tr|A0A0A6YW83|A0A0A6YW83_MOUSE	35	10415	1 (1)	1 (1)	0.33	Nuclear pore complex protein Nup214 (Fragment) OS=Mus musculus GN=Nup214 PE=1 SV=1
850	tr|F6VF36|F6VF36_MOUSE	35	16799	1 (1)	1 (1)	0.2	Signal recognition particle receptor ('docking protein') (Fragment) OS=Mus musculus GN=Srpr PE=1 SV=1
851	tr|A0A1B0GQU8|A0A1B0GQU8_MOUSE	35	18147	2 (1)	2 (1)	0.19	60S ribosomal protein L18 OS=Mus musculus GN=Rpl18 PE=1 SV=1
852	tr|Q3TW82|Q3TW82_MOUSE	35	74681	2 (2)	2 (2)	0.09	Beta-glucuronidase OS=Mus musculus GN=Gusb PE=2 SV=1
853	tr|A0A1Y7VLY2|A0A1Y7VLY2_MOUSE	35	224215	1 (1)	1 (1)	0.01	Dedicator of cytokinesis protein 4 OS=Mus musculus GN=Dock4 PE=4 SV=1
854	tr|Q542I8|Q542I8_MOUSE	35	88031	2 (1)	2 (1)	0.04	Integrin beta OS=Mus musculus GN=Itgb2 PE=1 SV=1
855	tr|Q7TPD9|Q7TPD9_MOUSE	35	19708	2 (1)	2 (1)	0.17	Actin-related protein 2/3 complex subunit 4 OS=Mus musculus GN=Arpc4 PE=2 SV=1
856	tr|Q5BLK2|Q5BLK2_MOUSE	35	13478	2 (2)	2 (2)	0.57	MCG3574 OS=Mus musculus GN=Rps20 PE=1 SV=1
857	tr|A0A1B0GRR3|A0A1B0GRR3_MOUSE	35	15302	1 (1)	1 (1)	0.22	40S ribosomal protein S11 OS=Mus musculus GN=Rps11 PE=1 SV=1
858	sp|Q3ULM6|USPL1_MOUSE	35	120652	1 (1)	1 (1)	0.03	SUMO-specific isopeptidase USPL1 OS=Mus musculus GN=Uspl1 PE=2 SV=2
859	sp|Q9DBE0|CSAD_MOUSE	35	55737	1 (1)	1 (1)	0.06	Cysteine sulfinic acid decarboxylase OS=Mus musculus GN=Csad PE=1 SV=1
860	tr|A0A0N4SUV6|A0A0N4SUV6_MOUSE	35	58663	1 (1)	1 (1)	0.06	Selenocysteine-specific elongation factor OS=Mus musculus GN=Eefsec PE=1 SV=1
861	sp|Q3B7Z2|OSBP1_MOUSE	35	89596	1 (1)	1 (1)	0.04	Oxysterol-binding protein 1 OS=Mus musculus GN=Osbp PE=1 SV=3
862	sp|Q8QZS1|HIBCH_MOUSE	35	43295	3 (2)	3 (2)	0.16	3-hydroxyisobutyryl-CoA hydrolase, mitochondrial OS=Mus musculus GN=Hibch PE=1 SV=1
863	sp|Q9D7J9|ECHD3_MOUSE	35	32667	1 (1)	1 (1)	0.1	Enoyl-CoA hydratase domain-containing protein 3, mitochondrial OS=Mus musculus GN=Echdc3 PE=1 SV=1
864	tr|A0A0A6YX73|A0A0A6YX73_MOUSE	35	43481	1 (1)	1 (1)	0.08	cAMP-dependent protein kinase type II-alpha regulatory subunit OS=Mus musculus GN=Prkar2a PE=1 SV=1
865	sp|Q8BG07|PLD4_MOUSE	35	56460	1 (1)	1 (1)	0.06	Phospholipase D4 OS=Mus musculus GN=Pld4 PE=1 SV=1
866	tr|A0A0A6YWH7|A0A0A6YWH7_MOUSE	35	32380	1 (1)	1 (1)	0.1	Antithrombin-III (Fragment) OS=Mus musculus GN=Serpinc1 PE=1 SV=1
867	sp|P27046|MA2A1_MOUSE	34	132289	2 (2)	2 (2)	0.05	Alpha-mannosidase 2 OS=Mus musculus GN=Man2a1 PE=1 SV=2
868	tr|Q9Z1R9|Q9Z1R9_MOUSE	34	26802	4 (2)	1 (1)	0.26	MCG124046 OS=Mus musculus GN=Prss1 PE=1 SV=1
869	tr|A2AC29|A2AC29_MOUSE	34	13848	2 (2)	2 (2)	0.55	3-beta-hydroxysteroid-Delta(8),Delta(7)-isomerase (Fragment) OS=Mus musculus GN=Ebp PE=1 SV=1
870	tr|B2RWW2|B2RWW2_MOUSE	34	371310	1 (1)	1 (1)	0.01	Golgb1 protein OS=Mus musculus GN=Golgb1 PE=2 SV=1
871	sp|Q3U0J8|TBD2B_MOUSE	34	110565	1 (1)	1 (1)	0.03	TBC1 domain family member 2B OS=Mus musculus GN=Tbc1d2b PE=1 SV=2
872	sp|Q9DCM0|ETHE1_MOUSE	34	28234	2 (2)	2 (2)	0.25	Persulfide dioxygenase ETHE1, mitochondrial OS=Mus musculus GN=Ethe1 PE=1 SV=2
873	sp|Q2TPA8|HSDL2_MOUSE	32	54516	2 (2)	2 (2)	0.12	Hydroxysteroid dehydrogenase-like protein 2 OS=Mus musculus GN=Hsdl2 PE=1 SV=1
874	sp|Q8BMF4|ODP2_MOUSE	34	68469	1 (1)	1 (1)	0.05	Dihydrolipoyllysine-residue acetyltransferase component of pyruvate dehydrogenase complex, mitochondrial OS=Mus musculus GN=Dlat PE=1 SV=2
875	tr|Q5SS40|Q5SS40_MOUSE	34	29326	1 (1)	1 (1)	0.11	Tyrosine 3-monooxygenase/tryptophan 5-monooxygenase activation protein, epsilon polypeptide, isoform CRA_c OS=Mus musculus GN=Ywhae PE=1 SV=1
876	tr|D3YYS6|D3YYS6_MOUSE	34	36973	1 (1)	1 (1)	0.09	Monoglyceride lipase OS=Mus musculus GN=Mgll PE=1 SV=1
877	tr|D3YXG6|D3YXG6_MOUSE	34	32606	1 (1)	1 (1)	0.1	Arp2/3 complex 34 kDa subunit OS=Mus musculus GN=Arpc2 PE=1 SV=1
878	tr|A0A1S6GWH2|A0A1S6GWH2_MOUSE	34	55349	1 (1)	1 (1)	0.06	Uncharacterized protein OS=Mus musculus GN=Ddx39b PE=2 SV=1
879	tr|A0A1Y7VKY1|A0A1Y7VKY1_MOUSE	34	17738	2 (2)	2 (2)	0.42	MCG116671 OS=Mus musculus GN=mCG_116671 PE=4 SV=1
880	sp|Q9ERK4|XPO2_MOUSE	34	111183	1 (1)	1 (1)	0.03	Exportin-2 OS=Mus musculus GN=Cse1l PE=1 SV=1
881	sp|Q9QYB1|CLIC4_MOUSE	34	28939	1 (1)	1 (1)	0.11	Chloride intracellular channel protein 4 OS=Mus musculus GN=Clic4 PE=1 SV=3
882	sp|Q99KR3|LACB2_MOUSE	33	33019	1 (1)	1 (1)	0.1	Endoribonuclease LACTB2 OS=Mus musculus GN=Lactb2 PE=1 SV=1
883	tr|Q3TUS8|Q3TUS8_MOUSE	33	41937	1 (1)	1 (1)	0.08	Uncharacterized protein OS=Mus musculus GN=Amacr PE=2 SV=1
884	tr|A0A0A6YY89|A0A0A6YY89_MOUSE	33	4511	2 (2)	1 (1)	0.81	Mitochondrial pyruvate carrier 2 OS=Mus musculus GN=Mpc2 PE=1 SV=1
885	tr|Q7TPW6|Q7TPW6_MOUSE	33	33286	2 (1)	2 (1)	0.1	Solute carrier family 25 (Mitochondrial carnitine/acylcarnitine translocase), member 20 OS=Mus musculus GN=Slc25a20 PE=2 SV=1
886	tr|F6TUL9|F6TUL9_MOUSE	33	31846	1 (1)	1 (1)	0.1	V-set and immunoglobulin domain-containing 4 OS=Mus musculus GN=Vsig4 PE=1 SV=1
887	tr|Q3TIV6|Q3TIV6_MOUSE	33	68253	2 (1)	2 (1)	0.05	Lysine--tRNA ligase OS=Mus musculus GN=Kars PE=1 SV=1
888	tr|Q3TSZ4|Q3TSZ4_MOUSE	33	38037	3 (3)	3 (3)	0.28	Aldose 1-epimerase OS=Mus musculus GN=Galm PE=2 SV=1
889	sp|Q9R099|TBL2_MOUSE	33	50179	1 (1)	1 (1)	0.07	Transducin beta-like protein 2 OS=Mus musculus GN=Tbl2 PE=1 SV=2
890	tr|Q3TG71|Q3TG71_MOUSE	33	37709	2 (1)	2 (1)	0.09	CNDP dipeptidase 2 (Metallopeptidase M20 family), isoform CRA_a OS=Mus musculus GN=Cndp2 PE=2 SV=1
891	tr|E0CX74|E0CX74_MOUSE	33	43765	1 (1)	1 (1)	0.08	Delta(14)-sterol reductase OS=Mus musculus GN=Tm7sf2 PE=1 SV=1
892	tr|A0A0G2JDW7|A0A0G2JDW7_MOUSE	33	9569	2 (1)	2 (1)	0.36	40S ribosomal protein S27 (Fragment) OS=Mus musculus GN=Rps27 PE=1 SV=1
893	tr|A8DUV3|A8DUV3_MOUSE	33	15133	2 (2)	2 (2)	0.5	Alpha-globin OS=Mus musculus GN=Hbat1 PE=3 SV=1
894	tr|A0A0N4SVT3|A0A0N4SVT3_MOUSE	33	7250	1 (1)	1 (1)	0.49	Guanine nucleotide-binding protein subunit gamma (Fragment) OS=Mus musculus GN=Gng12 PE=1 SV=1
895	sp|Q91XV3|BASP1_MOUSE	33	22074	2 (2)	2 (2)	0.33	Brain acid soluble protein 1 OS=Mus musculus GN=Basp1 PE=1 SV=3
896	tr|Q3TJA9|Q3TJA9_MOUSE	33	50139	1 (1)	1 (1)	0.07	DnaJ (Hsp40) homolog, subfamily A, member 3, isoform CRA_b OS=Mus musculus GN=Dnaja3 PE=2 SV=1
897	tr|A0A0R4J1H2|A0A0R4J1H2_MOUSE	33	55585	2 (1)	2 (1)	0.06	Glycerate kinase OS=Mus musculus GN=Glyctk PE=1 SV=1
898	tr|Q3ULW0|Q3ULW0_MOUSE	33	24507	1 (1)	1 (1)	0.14	GTP-binding nuclear protein Ran OS=Mus musculus GN=Ran PE=2 SV=1
899	tr|E9PXF8|E9PXF8_MOUSE	33	212322	1 (1)	1 (1)	0.02	SET-binding factor 2 OS=Mus musculus GN=Sbf2 PE=1 SV=1
900	sp|Q9D404|OXSM_MOUSE	33	49224	1 (1)	1 (1)	0.07	3-oxoacyl-[acyl-carrier-protein] synthase, mitochondrial OS=Mus musculus GN=Oxsm PE=1 SV=1
901	tr|Q3U0S1|Q3U0S1_MOUSE	33	81309	1 (1)	1 (1)	0.04	Uncharacterized protein OS=Mus musculus GN=Parp12 PE=2 SV=1
902	tr|G3UZM4|G3UZM4_MOUSE	32	47772	1 (1)	1 (1)	0.07	Cell adhesion molecule 2 (Fragment) OS=Mus musculus GN=Cadm2 PE=1 SV=1
903	tr|A2BGG7|A2BGG7_MOUSE	32	24726	2 (1)	2 (1)	0.14	Nuclease-sensitive element-binding protein 1 (Fragment) OS=Mus musculus GN=Ybx1 PE=1 SV=1
904	sp|Q9JLJ4|ELOV2_MOUSE	32	34470	2 (2)	1 (1)	0.2	Elongation of very long chain fatty acids protein 2 OS=Mus musculus GN=Elovl2 PE=1 SV=1
905	tr|Q3U029|Q3U029_MOUSE	32	42829	2 (1)	2 (1)	0.08	Uncharacterized protein OS=Mus musculus GN=Cpox PE=2 SV=1
906	tr|Q3TK12|Q3TK12_MOUSE	32	15630	1 (1)	1 (1)	0.22	Uncharacterized protein OS=Mus musculus GN=Rps17 PE=2 SV=1
907	sp|Q8VE95|CH082_MOUSE	32	24656	1 (1)	1 (1)	0.14	UPF0598 protein C8orf82 homolog OS=Mus musculus PE=1 SV=1
908	tr|Q5XK33|Q5XK33_MOUSE	32	18597	3 (1)	2 (1)	0.18	Succinate dehydrogenase complex, subunit C, integral membrane protein OS=Mus musculus GN=Sdhc PE=2 SV=1
909	tr|Q3TCZ2|Q3TCZ2_MOUSE	32	50898	1 (1)	1 (1)	0.06	Solute carrier family 29 (Nucleoside transporters), member 1, isoform CRA_a OS=Mus musculus GN=Slc29a1 PE=2 SV=1
910	tr|Q3TGR2|Q3TGR2_MOUSE	32	55402	1 (1)	1 (1)	0.06	Fibrinogen, B beta polypeptide, isoform CRA_a OS=Mus musculus GN=Fgb PE=1 SV=1
911	tr|D3YW25|D3YW25_MOUSE	32	22757	1 (1)	1 (1)	0.15	Ninjurin 1, isoform CRA_a OS=Mus musculus GN=Ninj1 PE=1 SV=1
912	sp|Q6PGH4|F222A_MOUSE	32	47830	1 (1)	1 (1)	0.07	Protein FAM222A OS=Mus musculus GN=Fam222a PE=2 SV=1
913	sp|P14733|LMNB1_MOUSE	32	66973	3 (1)	3 (1)	0.05	Lamin-B1 OS=Mus musculus GN=Lmnb1 PE=1 SV=3
914	tr|A0A1W2P7P6|A0A1W2P7P6_MOUSE	32	32529	1 (1)	1 (1)	0.1	Transmembrane protein 19 OS=Mus musculus GN=Tmem19 PE=1 SV=1
915	tr|M0QWY0|M0QWY0_MOUSE	32	14706	1 (1)	1 (1)	0.23	ER membrane protein complex subunit 8 (Fragment) OS=Mus musculus GN=Emc8 PE=1 SV=1
916	tr|D3YVJ7|D3YVJ7_MOUSE	32	19762	1 (1)	1 (1)	0.17	Aldo-keto reductase family 1, member B3 (aldose reductase) (Fragment) OS=Mus musculus GN=Akr1b3 PE=1 SV=1
917	sp|B1AR13|CISD3_MOUSE	31	16065	1 (1)	1 (1)	0.21	CDGSH iron-sulfur domain-containing protein 3, mitochondrial OS=Mus musculus GN=Cisd3 PE=1 SV=1
918	tr|Q497N1|Q497N1_MOUSE	31	13292	1 (1)	1 (1)	0.26	40S ribosomal protein S26 OS=Mus musculus GN=Rps26 PE=1 SV=1
919	tr|A0A0U1RPI1|A0A0U1RPI1_MOUSE	31	7825	1 (1)	1 (1)	0.45	Phospholemman OS=Mus musculus GN=Fxyd1 PE=1 SV=1
920	tr|A0A1B0GS70|A0A1B0GS70_MOUSE	31	26764	1 (1)	1 (1)	0.12	Proteasome endopeptidase complex OS=Mus musculus GN=Psma1 PE=1 SV=1
921	tr|A0A1L1SQA8|A0A1L1SQA8_MOUSE	31	10360	1 (1)	1 (1)	0.34	40S ribosomal protein S25 OS=Mus musculus GN=Rps25 PE=1 SV=1
922	tr|A0A1B0GQZ6|A0A1B0GQZ6_MOUSE	31	42886	1 (1)	1 (1)	0.08	Ubiquitin thioesterase Zranb1 OS=Mus musculus GN=Zranb1 PE=4 SV=1
923	tr|F2YMC1|F2YMC1_MOUSE	31	140359	1 (1)	1 (1)	0.02	Moloney leukemia virus 10-like 1 OS=Mus musculus GN=Mov10l1 PE=2 SV=1
924	tr|Q3UW40|Q3UW40_MOUSE	31	18355	1 (1)	1 (1)	0.18	Uncharacterized protein OS=Mus musculus GN=Rpl24 PE=2 SV=1
925	tr|D3YVW0|D3YVW0_MOUSE	31	48357	1 (1)	1 (1)	0.07	Metaxin-1 OS=Mus musculus GN=Mtx1 PE=1 SV=2
926	tr|Q8CD51|Q8CD51_MOUSE	31	81808	1 (1)	1 (1)	0.04	Uncharacterized protein (Fragment) OS=Mus musculus GN=Enpep PE=2 SV=1
927	tr|A0A0R4IZW8|A0A0R4IZW8_MOUSE	31	28502	1 (1)	1 (1)	0.12	Calpain small subunit 1 OS=Mus musculus GN=Capns1 PE=1 SV=1
928	tr|Q3UEN8|Q3UEN8_MOUSE	31	58159	2 (2)	2 (2)	0.12	MCG15287 OS=Mus musculus GN=Cyp3a11 PE=1 SV=1
929	tr|Q3V1Z7|Q3V1Z7_MOUSE	31	83475	1 (1)	1 (1)	0.04	Uncharacterized protein OS=Mus musculus GN=Ddx1 PE=2 SV=1
930	sp|Q3TCJ1|ABRX2_MOUSE	30	47142	1 (1)	1 (1)	0.07	BRISC complex subunit Abraxas 2 OS=Mus musculus GN=Abraxas2 PE=1 SV=1
931	sp|Q8N7N5|DCAF8_MOUSE	30	66675	1 (1)	1 (1)	0.05	DDB1- and CUL4-associated factor 8 OS=Mus musculus GN=Dcaf8 PE=1 SV=1
932	sp|Q9R1S7|MRP6_MOUSE	30	166463	1 (1)	1 (1)	0.02	Multidrug resistance-associated protein 6 OS=Mus musculus GN=Abcc6 PE=1 SV=3
933	tr|Q5BLJ7|Q5BLJ7_MOUSE	30	17212	2 (1)	2 (1)	0.2	MCG10205 OS=Mus musculus GN=Rps13 PE=1 SV=1
934	tr|Q3U026|Q3U026_MOUSE	30	91973	1 (1)	1 (1)	0.04	Uncharacterized protein OS=Mus musculus GN=Mogs PE=2 SV=1
935	tr|A0A0J9YUD8|A0A0J9YUD8_MOUSE	30	19932	1 (1)	1 (1)	0.17	High mobility group protein B1 OS=Mus musculus GN=Hmgb1 PE=1 SV=1
936	sp|Q3TXS7|PSMD1_MOUSE	30	106689	3 (3)	3 (3)	0.09	26S proteasome non-ATPase regulatory subunit 1 OS=Mus musculus GN=Psmd1 PE=1 SV=1
937	tr|Q3V1L5|Q3V1L5_MOUSE	30	144686	1 (1)	1 (1)	0.02	Uncharacterized protein (Fragment) OS=Mus musculus GN=Tpr PE=2 SV=1
938	sp|Q9CPQ8|ATP5L_MOUSE	30	11417	2 (2)	1 (1)	0.69	ATP synthase subunit g, mitochondrial OS=Mus musculus GN=Atp5l PE=1 SV=1
939	tr|Q3U6G1|Q3U6G1_MOUSE	30	22297	4 (3)	4 (3)	0.52	Biliverdin reductase B (Flavin reductase (NADPH)) OS=Mus musculus GN=Blvrb PE=1 SV=1
940	tr|Q3UZG4|Q3UZG4_MOUSE	30	35544	1 (1)	1 (1)	0.09	Aminoacyl tRNA synthase complex-interacting multifunctional protein 1 OS=Mus musculus GN=Aimp1 PE=1 SV=1
941	sp|Q3UW53|NIBAN_MOUSE	30	103440	1 (1)	1 (1)	0.03	Protein Niban OS=Mus musculus GN=Fam129a PE=1 SV=2
942	sp|Q6GQT9|NOMO1_MOUSE	30	134362	2 (1)	2 (1)	0.02	Nodal modulator 1 OS=Mus musculus GN=Nomo1 PE=1 SV=1
943	sp|Q91X91|NADC_MOUSE	30	31852	3 (1)	3 (1)	0.1	Nicotinate-nucleotide pyrophosphorylase [carboxylating] OS=Mus musculus GN=Qprt PE=1 SV=1
944	sp|Q925I1|ATAD3_MOUSE	30	66872	1 (1)	1 (1)	0.05	ATPase family AAA domain-containing protein 3 OS=Mus musculus GN=Atad3 PE=1 SV=1
945	sp|Q8VHE0|SEC63_MOUSE	30	88214	1 (1)	1 (1)	0.04	Translocation protein SEC63 homolog OS=Mus musculus GN=Sec63 PE=1 SV=4
946	tr|A0A0G2JEJ0|A0A0G2JEJ0_MOUSE	30	26983	1 (1)	1 (1)	0.12	PDZ and LIM domain protein 5 (Fragment) OS=Mus musculus GN=Pdlim5 PE=1 SV=1
947	tr|A0A0N4SVQ1|A0A0N4SVQ1_MOUSE	29	5873	2 (1)	2 (1)	0.61	Cytochrome c oxidase subunit NDUFA4 OS=Mus musculus GN=Ndufa4 PE=1 SV=1
948	tr|A0A087WQ15|A0A087WQ15_MOUSE	29	7054	1 (1)	1 (1)	0.5	Phenylalanine--tRNA ligase beta subunit OS=Mus musculus GN=Farsb PE=1 SV=1
949	tr|B2RTM0|B2RTM0_MOUSE	29	11360	1 (1)	1 (1)	0.3	Histone H4 OS=Mus musculus GN=Hist2h4 PE=1 SV=1
950	tr|Q3THQ5|Q3THQ5_MOUSE	29	63089	1 (1)	1 (1)	0.05	Uncharacterized protein OS=Mus musculus GN=Stip1 PE=2 SV=1
951	tr|H3BKJ1|H3BKJ1_MOUSE	29	46384	1 (1)	1 (1)	0.07	Predicted gene 20683 (Fragment) OS=Mus musculus GN=Gm20683 PE=4 SV=1
952	tr|B1ATP7|B1ATP7_MOUSE	29	93200	2 (1)	1 (1)	0.04	Zinc phosphodiesterase ELAC protein 2 OS=Mus musculus GN=Elac2 PE=1 SV=1
953	tr|A2A7A7|A2A7A7_MOUSE	29	90423	2 (1)	2 (1)	0.04	GDH/6PGL endoplasmic bifunctional protein OS=Mus musculus GN=H6pd PE=1 SV=1
954	sp|Q8R0X7|SGPL1_MOUSE	28	64263	2 (2)	2 (2)	0.1	Sphingosine-1-phosphate lyase 1 OS=Mus musculus GN=Sgpl1 PE=1 SV=1
955	tr|Q5M9J2|Q5M9J2_MOUSE	29	17366	2 (2)	2 (2)	0.43	Histidine triad nucleotide binding protein 2 OS=Mus musculus GN=Hint2 PE=1 SV=1
956	sp|A2ADY9|DDI2_MOUSE	29	45019	1 (1)	1 (1)	0.07	Protein DDI1 homolog 2 OS=Mus musculus GN=Ddi2 PE=1 SV=1
957	sp|Q6P6J9|TXD15_MOUSE	29	38464	1 (1)	1 (1)	0.09	Thioredoxin domain-containing protein 15 OS=Mus musculus GN=Txndc15 PE=1 SV=1
958	sp|Q3TL44|NLRX1_MOUSE	29	108789	1 (1)	1 (1)	0.03	NLR family member X1 OS=Mus musculus GN=Nlrx1 PE=1 SV=1
959	tr|Q3UDN8|Q3UDN8_MOUSE	28	69555	1 (1)	1 (1)	0.05	Uncharacterized protein (Fragment) OS=Mus musculus GN=Trim28 PE=2 SV=1
960	tr|A0A0G2JF71|A0A0G2JF71_MOUSE	28	16467	1 (1)	1 (1)	0.21	Methionine aminopeptidase 1 OS=Mus musculus GN=Metap1 PE=1 SV=1
961	tr|A0A1D5RLD0|A0A1D5RLD0_MOUSE	28	20267	1 (1)	1 (1)	0.17	Cytochrome P450, family 4, subfamily f, polypeptide 18 (Fragment) OS=Mus musculus GN=Cyp4f18 PE=1 SV=1
962	sp|Q8R1B4|EIF3C_MOUSE	28	106149	2 (1)	2 (1)	0.03	Eukaryotic translation initiation factor 3 subunit C OS=Mus musculus GN=Eif3c PE=1 SV=1
963	tr|A0A140LJH7|A0A140LJH7_MOUSE	28	9227	1 (1)	1 (1)	0.38	Solute carrier organic anion transporter family member 2B1 (Fragment) OS=Mus musculus GN=Slco2b1 PE=1 SV=1
964	sp|Q8K3K7|PLCB_MOUSE	28	31332	1 (1)	1 (1)	0.11	1-acyl-sn-glycerol-3-phosphate acyltransferase beta OS=Mus musculus GN=Agpat2 PE=1 SV=1
965	tr|Q3U7X9|Q3U7X9_MOUSE	28	104898	1 (1)	1 (1)	0.03	Uncharacterized protein OS=Mus musculus GN=Ap2a2 PE=2 SV=1
966	tr|F6SFF5|F6SFF5_MOUSE	28	30434	1 (1)	1 (1)	0.11	Ubiquinone biosynthesis protein COQ9, mitochondrial (Fragment) OS=Mus musculus GN=Coq9 PE=1 SV=2
967	tr|Q99JS7|Q99JS7_MOUSE	28	11992	1 (1)	1 (1)	0.29	Pon3 protein OS=Mus musculus GN=Pon3 PE=2 SV=1
968	tr|Q4FJY3|Q4FJY3_MOUSE	28	37826	1 (1)	1 (1)	0.09	MCG129299 OS=Mus musculus GN=Tgoln1 PE=1 SV=1
969	sp|Q9DCM2|GSTK1_MOUSE	28	25801	2 (2)	2 (2)	0.28	Glutathione S-transferase kappa 1 OS=Mus musculus GN=Gstk1 PE=1 SV=3
970	tr|Q3U3A8|Q3U3A8_MOUSE	28	80605	1 (1)	1 (1)	0.04	Uncharacterized protein OS=Mus musculus GN=Capn2 PE=2 SV=1
971	tr|Q6A0D1|Q6A0D1_MOUSE	27	35083	1 (1)	1 (1)	0.09	MKIAA0103 protein (Fragment) OS=Mus musculus GN=Emc2 PE=1 SV=1
972	tr|A0A1S6GWG6|A0A1S6GWG6_MOUSE	27	59754	2 (1)	2 (1)	0.06	Uncharacterized protein OS=Mus musculus GN=Atp6v1b2 PE=2 SV=1
973	tr|Q3TVJ8|Q3TVJ8_MOUSE	27	19153	2 (2)	2 (2)	0.38	Signal sequence receptor, delta, isoform CRA_b OS=Mus musculus GN=Ssr4 PE=1 SV=1
974	tr|Q3V460|Q3V460_MOUSE	27	12013	1 (1)	1 (1)	0.29	Gene model 561, (NCBI) OS=Mus musculus GN=Smim26 PE=1 SV=1
975	tr|Q4FJQ0|Q4FJQ0_MOUSE	27	23760	1 (1)	1 (1)	0.14	MCG130610 OS=Mus musculus GN=Rab7 PE=1 SV=1
976	sp|P99026|PSB4_MOUSE	27	29211	1 (1)	1 (1)	0.11	Proteasome subunit beta type-4 OS=Mus musculus GN=Psmb4 PE=1 SV=1
977	tr|Q5SWJ8|Q5SWJ8_MOUSE	27	7793	1 (1)	1 (1)	0.45	MCG116534 OS=Mus musculus GN=mCG_116534 PE=2 SV=1
978	tr|Q3V040|Q3V040_MOUSE	27	54946	1 (1)	1 (1)	0.06	Uncharacterized protein OS=Mus musculus GN=Gm6588 PE=2 SV=1
979	tr|A0A1L1SSF2|A0A1L1SSF2_MOUSE	27	54225	1 (1)	1 (1)	0.06	ADP-dependent glucokinase OS=Mus musculus GN=Adpgk PE=1 SV=1
980	sp|Q8VDP4|CCAR2_MOUSE	27	103566	1 (1)	1 (1)	0.03	Cell cycle and apoptosis regulator protein 2 OS=Mus musculus GN=Ccar2 PE=1 SV=2
981	tr|Q5BL09|Q5BL09_MOUSE	27	28481	1 (1)	1 (1)	0.12	Npm1 protein OS=Mus musculus GN=Npm1 PE=2 SV=1
982	tr|A0A0A6YXF6|A0A0A6YXF6_MOUSE	27	18983	2 (2)	2 (2)	0.39	Transforming protein RhoA (Fragment) OS=Mus musculus GN=Rhoa PE=1 SV=1
983	tr|C9K0Z7|C9K0Z7_MOUSE	27	38844	1 (1)	1 (1)	0.09	Peptidylprolyl isomerase OS=Mus musculus GN=Fkbp8 PE=2 SV=1
984	tr|Q3UA53|Q3UA53_MOUSE	26	33101	1 (1)	1 (1)	0.1	Uncharacterized protein OS=Mus musculus GN=Ppa1 PE=2 SV=1
985	tr|D6RGB2|D6RGB2_MOUSE	26	9078	1 (1)	1 (1)	0.38	GATOR complex protein NPRL3 OS=Mus musculus GN=Nprl3 PE=4 SV=1
986	tr|D3Z2H2|D3Z2H2_MOUSE	26	99337	1 (1)	1 (1)	0.03	Catenin delta-1 OS=Mus musculus GN=Ctnnd1 PE=1 SV=1
987	tr|D3YZB2|D3YZB2_MOUSE	26	155644	2 (1)	2 (1)	0.02	Synaptojanin-2 OS=Mus musculus GN=Synj2 PE=1 SV=1
988	sp|Q6P3E7|HDA10_MOUSE	26	73089	1 (1)	1 (1)	0.04	Histone deacetylase 10 OS=Mus musculus GN=Hdac10 PE=2 SV=2
989	tr|Q3U0U7|Q3U0U7_MOUSE	26	75186	1 (1)	1 (1)	0.04	Uncharacterized protein OS=Mus musculus GN=Cd180 PE=2 SV=1
990	tr|Q640Q4|Q640Q4_MOUSE	26	144855	1 (1)	1 (1)	0.02	Gcn1l1 protein (Fragment) OS=Mus musculus GN=Gcn1l1 PE=2 SV=1
991	tr|Q3TJN6|Q3TJN6_MOUSE	26	47054	1 (1)	1 (1)	0.07	Sorting nexin OS=Mus musculus GN=Snx5 PE=2 SV=1
992	tr|G3X8P9|G3X8P9_MOUSE	26	148892	2 (1)	2 (1)	0.02	Aldehyde oxidase 1 OS=Mus musculus GN=Aox1 PE=1 SV=1
993	tr|Q3UNX7|Q3UNX7_MOUSE	26	34619	2 (1)	2 (1)	0.1	Dimethylaniline monooxygenase [N-oxide-forming] 1 (Fragment) OS=Mus musculus GN=Fmo1 PE=1 SV=1
994	tr|Q3UP42|Q3UP42_MOUSE	26	13211	1 (1)	1 (1)	0.26	S100 calcium binding protein A9 (Calgranulin B), isoform CRA_a OS=Mus musculus GN=S100a9 PE=1 SV=1
995	tr|Q4VA28|Q4VA28_MOUSE	26	18636	1 (1)	1 (1)	0.18	Ribosomal protein L21 OS=Mus musculus GN=Rpl21 PE=2 SV=1
996	tr|Q3TVV4|Q3TVV4_MOUSE	26	13693	1 (1)	1 (1)	0.25	Uncharacterized protein OS=Mus musculus GN=Hmox1 PE=2 SV=1
997	sp|Q91W64|CP270_MOUSE	26	56440	1 (1)	1 (1)	0.06	Cytochrome P450 2C70 OS=Mus musculus GN=Cyp2c70 PE=1 SV=2
998	sp|Q8BI72|CARF_MOUSE	25	60221	1 (1)	1 (1)	0.05	CDKN2A-interacting protein OS=Mus musculus GN=Cdkn2aip PE=1 SV=1
999	tr|I7HPX6|I7HPX6_MOUSE	25	4482	2 (1)	2 (1)	0.84	Cytochrome b-c1 complex subunit 8 OS=Mus musculus GN=Uqcrq PE=1 SV=1
1000	sp|Q8C0E2|VP26B_MOUSE	25	39157	1 (1)	1 (1)	0.08	Vacuolar protein sorting-associated protein 26B OS=Mus musculus GN=Vps26b PE=1 SV=1
1001	tr|Q69ZG4|Q69ZG4_MOUSE	25	96964	1 (1)	1 (1)	0.03	MKIAA1560 protein (Fragment) OS=Mus musculus GN=Gpam PE=2 SV=1
1002	tr|B2RWI2|B2RWI2_MOUSE	25	60895	1 (1)	1 (1)	0.05	Lactamase, beta OS=Mus musculus GN=Lactb PE=1 SV=1
1003	tr|Q3TT04|Q3TT04_MOUSE	25	93756	1 (1)	1 (1)	0.03	Uncharacterized protein OS=Mus musculus GN=Ipo5 PE=2 SV=1
1004	sp|Q91X72|HEMO_MOUSE	25	52026	1 (1)	1 (1)	0.06	Hemopexin OS=Mus musculus GN=Hpx PE=1 SV=2
1005	sp|Q60749|KHDR1_MOUSE	25	48511	1 (1)	1 (1)	0.07	KH domain-containing, RNA-binding, signal transduction-associated protein 1 OS=Mus musculus GN=Khdrbs1 PE=1 SV=2
1006	sp|P08228|SODC_MOUSE	25	16104	2 (1)	1 (1)	0.21	Superoxide dismutase [Cu-Zn] OS=Mus musculus GN=Sod1 PE=1 SV=2
1007	sp|Q6PGC1|DHX29_MOUSE	25	155020	1 (1)	1 (1)	0.02	ATP-dependent RNA helicase DHX29 OS=Mus musculus GN=Dhx29 PE=1 SV=1
1008	sp|Q63918|CAVN2_MOUSE	25	46792	1 (1)	1 (1)	0.07	Caveolae-associated protein 2 OS=Mus musculus GN=Cavin2 PE=1 SV=3
1009	sp|P33175|KIF5A_MOUSE	25	117745	2 (2)	2 (2)	0.06	Kinesin heavy chain isoform 5A OS=Mus musculus GN=Kif5a PE=1 SV=3
1010	tr|M0QWI1|M0QWI1_MOUSE	25	9943	1 (1)	1 (1)	0.35	X-linked retinitis pigmentosa GTPase regulator-interacting protein 1 (Fragment) OS=Mus musculus GN=Rpgrip1 PE=4 SV=1
1011	tr|B2RWX2|B2RWX2_MOUSE	25	194461	1 (1)	1 (1)	0.02	Complement component 4B (Childo blood group) OS=Mus musculus GN=C4b PE=2 SV=1
1012	tr|J3QMX2|J3QMX2_MOUSE	25	20331	1 (1)	1 (1)	0.17	Transportin-1 (Fragment) OS=Mus musculus GN=Tnpo1 PE=1 SV=1
1013	tr|G3X972|G3X972_MOUSE	25	120045	1 (1)	1 (1)	0.03	SEC24 related gene family, member C (S. cerevisiae), isoform CRA_a OS=Mus musculus GN=Sec24c PE=1 SV=1
1014	tr|A0A075DCG2|A0A075DCG2_MOUSE	25	29988	1 (1)	1 (1)	0.11	Cytochrome c oxidase subunit 3 OS=Mus musculus GN=COX3 PE=3 SV=1
1015	tr|G3X9W0|G3X9W0_MOUSE	24	36356	1 (1)	1 (1)	0.09	Heterogeneous nuclear ribonucleoprotein D, isoform CRA_a OS=Mus musculus GN=Hnrnpd PE=1 SV=1
1016	tr|Q3TLC1|Q3TLC1_MOUSE	24	10498	1 (1)	1 (1)	0.33	Uncharacterized protein OS=Mus musculus GN=Rpl37a PE=2 SV=1
1017	tr|F6QH25|F6QH25_MOUSE	24	38763	1 (1)	1 (1)	0.09	CD166 antigen (Fragment) OS=Mus musculus GN=Alcam PE=1 SV=1
1018	sp|Q91XE4|ACY3_MOUSE	24	35720	1 (1)	1 (1)	0.09	N-acyl-aromatic-L-amino acid amidohydrolase (carboxylate-forming) OS=Mus musculus GN=Acy3 PE=1 SV=1
1019	tr|A0A087WP46|A0A087WP46_MOUSE	24	131370	1 (1)	1 (1)	0.02	cDNA sequence BC034090 OS=Mus musculus GN=BC034090 PE=1 SV=1
1020	tr|Q6ZWX1|Q6ZWX1_MOUSE	24	12660	1 (1)	1 (1)	0.27	MCG1036414 OS=Mus musculus GN=Rpl35a PE=1 SV=1
1021	tr|Q5M9M4|Q5M9M4_MOUSE	24	14944	2 (1)	2 (1)	0.23	Ribosomal protein S15A OS=Mus musculus GN=Rps15a PE=1 SV=1
1022	sp|Q7TSH7|KCNF1_MOUSE	24	56410	1 (1)	1 (1)	0.06	Potassium voltage-gated channel subfamily F member 1 OS=Mus musculus GN=Kcnf1 PE=1 SV=1
1023	tr|Q3U382|Q3U382_MOUSE	24	130141	1 (1)	1 (1)	0.03	Uncharacterized protein OS=Mus musculus GN=Ptprc PE=2 SV=1
1024	tr|Q3TXH6|Q3TXH6_MOUSE	24	59318	1 (1)	1 (1)	0.06	Uncharacterized protein OS=Mus musculus GN=Smarcd2 PE=2 SV=1
1025	tr|Q3TF84|Q3TF84_MOUSE	24	20738	1 (1)	1 (1)	0.16	Uncharacterized protein OS=Mus musculus GN=Lrrc59 PE=2 SV=1
1026	tr|Q3TVK3|Q3TVK3_MOUSE	24	53003	1 (1)	1 (1)	0.06	Aspartyl aminopeptidase OS=Mus musculus GN=Dnpep PE=1 SV=1
1027	tr|Q3UIH5|Q3UIH5_MOUSE	24	49046	1 (1)	1 (1)	0.07	Uncharacterized protein OS=Mus musculus GN=Psmc2 PE=2 SV=1
1028	tr|A0A075DCB1|A0A075DCB1_MOUSE	23	68799	1 (1)	1 (1)	0.05	NADH-ubiquinone oxidoreductase chain 5 OS=Mus musculus GN=ND5 PE=3 SV=1
1029	tr|F6TZU3|F6TZU3_MOUSE	23	68690	1 (1)	1 (1)	0.05	Gigaxonin (Fragment) OS=Mus musculus GN=Gan PE=1 SV=1
1030	sp|Q6PHZ5|RB15B_MOUSE	23	97246	2 (1)	2 (1)	0.03	Putative RNA-binding protein 15B OS=Mus musculus GN=Rbm15b PE=1 SV=2
1031	sp|Q5SSH8|NEUFC_MOUSE	23	29543	1 (1)	1 (1)	0.11	Neuferricin OS=Mus musculus GN=Cyb5d2 PE=1 SV=1
1032	sp|Q99J95|CDK9_MOUSE	23	43133	1 (1)	1 (1)	0.08	Cyclin-dependent kinase 9 OS=Mus musculus GN=Cdk9 PE=1 SV=1
1033	tr|A2AWN8|A2AWN8_MOUSE	23	63975	1 (1)	1 (1)	0.05	YTH domain family 1, isoform CRA_a OS=Mus musculus GN=Ythdf1 PE=1 SV=1
1034	sp|Q91XU3|PI42C_MOUSE	23	47477	1 (1)	1 (1)	0.07	Phosphatidylinositol 5-phosphate 4-kinase type-2 gamma OS=Mus musculus GN=Pip4k2c PE=1 SV=1
1035	tr|Q9CTF6|Q9CTF6_MOUSE	23	11001	1 (1)	1 (1)	0.31	Uncharacterized protein (Fragment) OS=Mus musculus GN=Rras2 PE=2 SV=1
1036	tr|A0A0G2JG95|A0A0G2JG95_MOUSE	23	20339	1 (1)	1 (1)	0.17	Serine/threonine-protein phosphatase PGAM5, mitochondrial (Fragment) OS=Mus musculus GN=Pgam5 PE=1 SV=1
1037	sp|P51658|DHB2_MOUSE	23	42436	1 (1)	1 (1)	0.08	Estradiol 17-beta-dehydrogenase 2 OS=Mus musculus GN=Hsd17b2 PE=1 SV=2
1038	tr|G3X8T3|G3X8T3_MOUSE	23	56318	2 (1)	1 (1)	0.06	Carboxypeptidase OS=Mus musculus GN=Ctsa PE=1 SV=1
1039	sp|Q3UNX5|ACSM3_MOUSE	23	66151	1 (1)	1 (1)	0.05	Acyl-coenzyme A synthetase ACSM3, mitochondrial OS=Mus musculus GN=Acsm3 PE=1 SV=2
1040	tr|Q0VGU0|Q0VGU0_MOUSE	23	22482	1 (1)	1 (1)	0.15	SAR1 gene homolog B (S. cerevisiae) OS=Mus musculus GN=Sar1b PE=1 SV=1
1041	tr|D3YWI3|D3YWI3_MOUSE	23	11688	1 (1)	1 (1)	0.3	Rho guanine nucleotide exchange factor 18 (Fragment) OS=Mus musculus GN=Arhgef18 PE=4 SV=1
1042	tr|A0A075B5T6|A0A075B5T6_MOUSE	23	13707	1 (1)	1 (1)	0.25	Immunoglobulin heavy variable V10-3 (Fragment) OS=Mus musculus GN=Ighv10-3 PE=4 SV=1
1043	sp|Q9CQD1|RAB5A_MOUSE	23	23812	2 (1)	2 (1)	0.14	Ras-related protein Rab-5A OS=Mus musculus GN=Rab5a PE=1 SV=1
1044	tr|D3YY53|D3YY53_MOUSE	23	26732	2 (1)	1 (1)	0.12	Nitrilase homolog 1 OS=Mus musculus GN=Nit1 PE=1 SV=1
1045	tr|A0A0A6YX05|A0A0A6YX05_MOUSE	23	15472	1 (1)	1 (1)	0.22	Sodium/potassium-transporting ATPase subunit beta (Fragment) OS=Mus musculus GN=Atp1b1 PE=1 SV=1
1046	tr|Q542I9|Q542I9_MOUSE	23	49325	1 (1)	1 (1)	0.07	MCG122657 OS=Mus musculus GN=Psmc1 PE=1 SV=1
1047	tr|Q3UFD9|Q3UFD9_MOUSE	23	9325	1 (1)	1 (1)	0.37	Uncharacterized protein OS=Mus musculus GN=Gm10861 PE=2 SV=1
1048	tr|A0A1S6GWG5|A0A1S6GWG5_MOUSE	23	45920	1 (1)	1 (1)	0.07	Mitochondrial ribosomal protein S9, isoform CRA_b OS=Mus musculus GN=Mrps9 PE=2 SV=1
1049	tr|Q3UDS4|Q3UDS4_MOUSE	23	50634	1 (1)	1 (1)	0.07	Uncharacterized protein OS=Mus musculus GN=Sqor PE=2 SV=1
1050	sp|Q8CFG0|SULF2_MOUSE	23	101688	1 (1)	1 (1)	0.03	Extracellular sulfatase Sulf-2 OS=Mus musculus GN=Sulf2 PE=2 SV=2
1051	tr|A0A0G2JEM6|A0A0G2JEM6_MOUSE	22	11406	1 (1)	1 (1)	0.3	Paired immunoglobulin-like type 2 receptor beta-2 (Fragment) OS=Mus musculus GN=Pilrb2 PE=4 SV=1
1052	sp|Q8CBF3|EPHB1_MOUSE	22	111350	1 (1)	1 (1)	0.03	Ephrin type-B receptor 1 OS=Mus musculus GN=Ephb1 PE=1 SV=1
1053	sp|Q9D7I8|FA83D_MOUSE	22	64740	1 (1)	1 (1)	0.05	Protein FAM83D OS=Mus musculus GN=Fam83d PE=2 SV=1
1054	sp|Q9DCC4|P5CR3_MOUSE	22	29159	1 (1)	1 (1)	0.11	Pyrroline-5-carboxylate reductase 3 OS=Mus musculus GN=Pycr3 PE=1 SV=2
1055	tr|A2AQN4|A2AQN4_MOUSE	22	81590	1 (1)	1 (1)	0.04	Acetyl-coenzyme A synthetase, cytoplasmic OS=Mus musculus GN=Acss2 PE=1 SV=1
1056	tr|A2ACD2|A2ACD2_MOUSE	22	22300	1 (1)	1 (1)	0.15	V-set and transmembrane domain-containing protein 2-like protein OS=Mus musculus GN=Vstm2l PE=1 SV=1
1057	sp|Q9WU02|V1BR_MOUSE	22	47136	1 (1)	1 (1)	0.07	Vasopressin V1b receptor OS=Mus musculus GN=Avpr1b PE=3 SV=1
1058	tr|Q6R5C6|Q6R5C6_MOUSE	22	23434	1 (1)	1 (1)	0.14	Predicted gene 10277 OS=Mus musculus GN=Gm10277 PE=2 SV=1
1059	sp|Q8QZY1|EIF3L_MOUSE	22	66798	2 (1)	2 (1)	0.05	Eukaryotic translation initiation factor 3 subunit L OS=Mus musculus GN=Eif3l PE=1 SV=1
1060	tr|A0A1B0GR69|A0A1B0GR69_MOUSE	22	13045	1 (1)	1 (1)	0.26	U1 small nuclear ribonucleoprotein 70 kDa (Fragment) OS=Mus musculus GN=Snrnp70 PE=1 SV=1
1061	sp|C0HKE1|H2A1B_MOUSE	22	14127	1 (1)	1 (1)	0.24	Histone H2A type 1-B OS=Mus musculus GN=Hist1h2ab PE=1 SV=1
1062	tr|A0A087WRE7|A0A087WRE7_MOUSE	21	49575	1 (1)	1 (1)	0.07	Hydroxyacid-oxoacid transhydrogenase, mitochondrial (Fragment) OS=Mus musculus GN=Adhfe1 PE=1 SV=1
1063	tr|B0QZI8|B0QZI8_MOUSE	21	17034	1 (1)	1 (1)	0.2	CDK5 regulatory subunit-associated protein 3 (Fragment) OS=Mus musculus GN=Cdk5rap3 PE=1 SV=1
1064	tr|Q6RFG4|Q6RFG4_MOUSE	21	81929	1 (1)	1 (1)	0.04	Myeloperoxidase OS=Mus musculus GN=Mpo PE=2 SV=1
1065	sp|Q8K2C9|HACD3_MOUSE	21	43274	1 (1)	1 (1)	0.08	Very-long-chain (3R)-3-hydroxyacyl-CoA dehydratase 3 OS=Mus musculus GN=Hacd3 PE=1 SV=2
1066	tr|Q3TFP8|Q3TFP8_MOUSE	21	19848	1 (1)	1 (1)	0.17	Uncharacterized protein OS=Mus musculus GN=Pgrmc1 PE=2 SV=1
1067	tr|Q3U2P5|Q3U2P5_MOUSE	21	39931	1 (1)	1 (1)	0.08	Uncharacterized protein OS=Mus musculus GN=Vwa8 PE=2 SV=1
1068	tr|Q3TF87|Q3TF87_MOUSE	21	57580	1 (1)	1 (1)	0.06	Uncharacterized protein OS=Mus musculus GN=Dars PE=2 SV=1
1069	tr|A0A0B4J1K5|A0A0B4J1K5_MOUSE	21	13579	1 (1)	1 (1)	0.25	Immunoglobulin lambda variable 3 (Fragment) OS=Mus musculus GN=Iglv3 PE=4 SV=1
1070	tr|M0QWK4|M0QWK4_MOUSE	21	38314	1 (1)	1 (1)	0.09	Glypican-2 OS=Mus musculus GN=Gpc2 PE=1 SV=1
1071	sp|P05125|ANF_MOUSE	21	16675	1 (1)	1 (1)	0.2	Natriuretic peptides A OS=Mus musculus GN=Nppa PE=1 SV=2
1072	sp|Q8R5J9|PRAF3_MOUSE	20	21543	1 (1)	1 (1)	0.16	PRA1 family protein 3 OS=Mus musculus GN=Arl6ip5 PE=1 SV=2
1073	tr|Q543N3|Q543N3_MOUSE	20	30374	1 (1)	1 (1)	0.11	LIM and SH3 protein 1, isoform CRA_b OS=Mus musculus GN=Lasp1 PE=1 SV=1
1074	tr|E0CXB1|E0CXB1_MOUSE	20	25704	1 (1)	1 (1)	0.13	Proteasome endopeptidase complex OS=Mus musculus GN=Psma6 PE=1 SV=1
1075	tr|A0A1B0GRS5|A0A1B0GRS5_MOUSE	20	24242	1 (1)	1 (1)	0.14	Macrophage scavenger receptor types I and II (Fragment) OS=Mus musculus GN=Msr1 PE=1 SV=1
1076	tr|A0A076N9U7|A0A076N9U7_MOUSE	20	363854	1 (1)	1 (1)	0.01	Celsr3 OS=Mus musculus GN=Celsr3 PE=2 SV=1
1077	tr|Q3UWT6|Q3UWT6_MOUSE	20	27663	1 (1)	1 (1)	0.12	Proteasome subunit alpha type OS=Mus musculus GN=Psma2 PE=2 SV=1
1078	sp|Q52KR3|PRUN2_MOUSE	20	341188	1 (1)	1 (1)	0.01	Protein prune homolog 2 OS=Mus musculus GN=Prune2 PE=1 SV=2
1079	tr|A2ATS4|A2ATS4_MOUSE	20	66182	1 (1)	1 (1)	0.05	Large neutral amino acids transporter small subunit 3 OS=Mus musculus GN=Slc43a1 PE=1 SV=1
